# Supplementary material for: tert-Butylphenylthiazoles with an oxadiazole linker: a novel orally bioavailable class of antibiotics exhibiting antibiofilm activity
Source: Royal Society of Chemistry journal article supplement (doi:10.1039/c8ra10525a), 2019-01-01
Supplement: c8ra10525a1.xlsx [file c8ra10525a1.xlsx]

## Sheet: Sheet1
Given data
		Dose (mg)	25
	Time (hr)	Cp (mg/mL)
	0	0
	0.6	6.03
	0.8	6.9
	1	7.4
	1.4	8.1
	1.8	8.3
	3	7.8
	4	7.1
	6	6.1
	8	5.1
	12	3.5
	24	0.7
Calculation area
		Dose (mg)	25
Givin data
	Time (hr)	Cp (mg/mL)		LN SCALE			Cp'=I*(e-k*t)		Isolating Distribution Exponent
CONDITION				Time (hr)	ln Cp		Time	Cp'	Time	Cp'-Cp	LnCp'-Cp		Time	LnCp'	LnCp-Cp'
	0	0		0	#NUM!		0	14.821	0	14.821	2.69605		0	2.69605	2.69605
	0.6	6.03		0.6	1.79675		0.6	13.7383	0.6	7.70832	2.0423		0.6	2.62019	2.0423
	0.8	6.9		0.8	1.93152		0.8	13.3953	0.8	6.49529	1.87108		0.8	2.5949	1.87108
	1	7.4		1	2.00148		1	13.0608	1	5.66083	1.73357		1	2.56962	1.73357
	1.4	8.1		1.4	2.09186		1.4	12.4168	1.4	4.31676	1.4625		1.4	2.51905	1.4625
	1.8	8.3		1.8	2.11626		1.8	11.8044	1.8	3.50444	1.25403		1.8	2.46848	1.25403
	3	7.8		2	2.05412		3	10.1428	3	2.34279	0.851342		3	2.31676	0.851342
	4	7.1		2.6	1.96009		4	8.93821	4	1.83821	0.608793		4	2.19034	0.608793
	6	6.1		3	1.80829		6	6.94124	6	0.841241	-0.172877		6	1.93748
	8	5.1		4	1.62924		8	5.39043	8	0.290433	-1.23638		8	1.68463
	12	3.5		7	1.25276		12	3.25085	12	-0.249152	#NUM!		12	1.17892
	24	0.7		12	-0.356675		24	0.713043	24	0.0130432	-4.33948		24	-0.338213
			ElinSlope (1/hr)	-0.126427					Absp Slope (1/hr)	-1.04468				Parameters
			k (1/hr)	0.126427					ka (1/hr)	1.04468				T1/2	5.48141		T1/2	5.5 h
			LnI	2.69605					LnI	2.69066				Vd/F L	1.92941		Vd L	1.9 L
			I mg/mL	14.821					I mg/mL	14.7414				AUC	102.489		AUC	102.5
														Cl/F L/hr AUC	0.24393		CL L/hr	0.24 L/h
														Cmax			Cmax	8.3 mg/mL
														Tmax			Tmax	1.8 h
