# Supplementary material for: tert-Butylphenylthiazoles with an oxadiazole linker: a novel orally bioavailable class of antibiotics exhibiting antibiofilm activity
Source: Royal Society of Chemistry journal article supplement (doi:10.1039/c8ra10525a), 2019-01-01
Supplement: c8ra10525a2.pdf [file c8ra10525a2.pdf]

Supporting information

***tert*-Butylphenylthiazoles with Oxadiazole Linker: A Novel Orally  
Bioavailable Class of Antibiotics Exhibiting Antibiofilm Activity**

Ahmed Kotb<sup>a†</sup>, Nader S. Abutaleb<sup>b†</sup>, Mohamed Hagrass<sup>a</sup>, Ashraf Bayoumi<sup>a</sup>, Mahmoud Mohamed AbdRabo Moustafa<sup>c</sup>, Adel Ghiaty<sup>a</sup>, Mohamed N. Seleem<sup>b, d\*</sup> and Abdelrahman S. Mayhoub<sup>a, e\*</sup>

<sup>a</sup> Department of Pharmaceutical Organic Chemistry, College of Pharmacy, Al-Azhar University, Cairo 11884, Egypt

<sup>b</sup> Department of Comparative Pathobiology, College of Veterinary Medicine, Purdue University, West Lafayette, IN, USA 47907

<sup>c</sup> Department of Pharmaceutical Chemistry, Imam Abdulrahman Bin Faisal University, Dammam 31441, Saudi Arabia

<sup>d</sup> Purdue Institute of Inflammation, Immunology, and Infectious Disease, West Lafayette, IN, USA, 47907

<sup>e</sup> University of Science and Technology, Zewail City of Science and Technology, Giza, Egypt

†These two authors contributed equally

\*Corresponding Authors e-mail: mseleem@purdue.edu, amayhoub@azhar.edu.eg

***In vitro* cytotoxicity analysis of compound 20 against fibroblast-like monkey kidney cells (Vero cells) and human colorectal adenocarcinoma (Caco-2)**

**Method:**

Compound **20** was assayed against a fibroblast-like monkey kidney cells (Vero cells) and human colorectal adenocarcinoma (Caco-2) (figure 1S & 2S) to determine its *in vitro* potential toxic effect, as described elsewhere [1, 2]. Briefly, Vero cells were cultured in Minimum Essential Medium (MEM) supplemented with 10% fetal bovine serum (FBS), 1 mM sodium pyruvate, and penicillin-streptomycin at 37 °C with CO<sub>2</sub> (5%). Caco-2 cells were cultured in Dulbecco's Modified Eagle Medium (DMEM) supplemented with 20% fetal bovine serum (FBS), non-essential amino acids (1X), penicillin-streptomycin at 37 °C with CO<sub>2</sub> (5%). Compound **20** and DMSO (in triplicates) were added to the cells. The cells were incubated with the compound at 37 °C with CO<sub>2</sub> (5%) for two hours. The assay reagent MTS 3-(4,5-dimethylthiazol-2-yl)-5-(3-carboxymethoxyphenyl)-2-(4-sulfophenyl)-2H-tetrazolium) (Promega, Madison, WI, USA) was subsequently added and the plate was incubated for four hours. Absorbance readings (at OD<sub>490</sub>) were measured using a kinetic microplate reader (Molecular Devices, Sunnyvale, CA, USA). The quantity of viable cells after treatment with the compound was expressed as a percentage of the viability relative to DMSO (average of triplicate wells ± standard deviation).

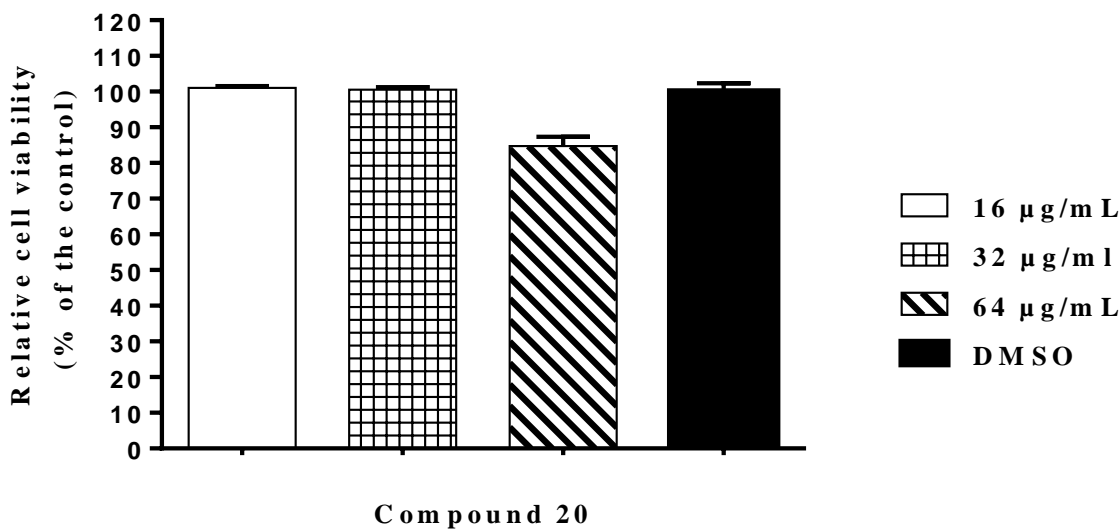

**Figure 1S:** *In vitro* cytotoxicity analysis of compound 20 against fibroblast-like monkey kidney cells (Vero cells) using the MTS 3-(4,5-dimethylthiazol-2-yl)-5-(3-carboxymethoxyphenyl)-2-(4-sulfophenyl)-2H-tetrazolium) assay. Results are presented as percent viable mammalian cells (measured as average absorbance ratio relative to DMSO) which was used as a negative control to determine a baseline measurement for the cytotoxic impact of the compound. The absorbance values represent an average of a minimum of three samples analyzed for each compound. Error bars represent standard deviation values for the absorbance values.

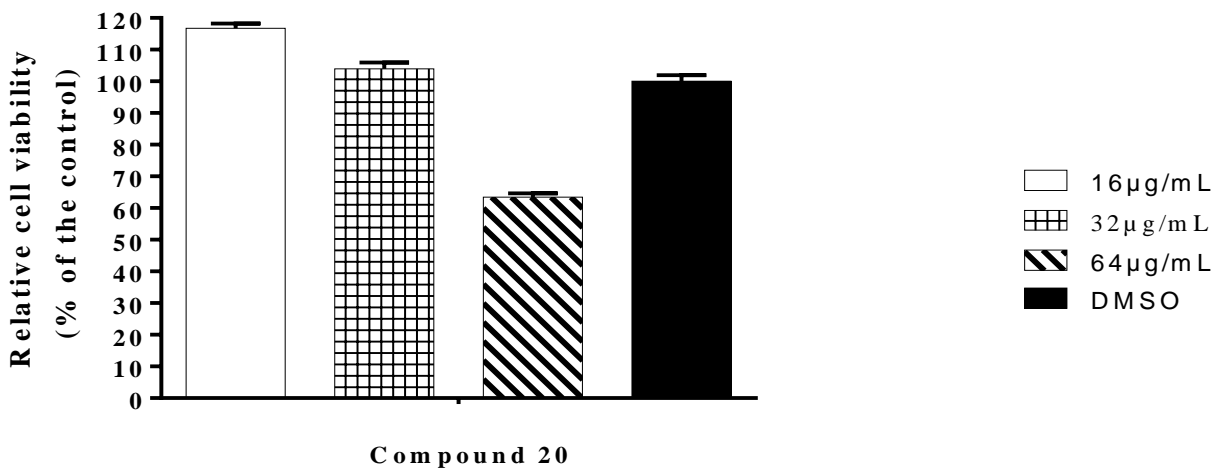

**Figure 2S:** *In vitro* cytotoxicity analysis of compound 20 against human colorectal adenocarcinoma (Caco-2) using the MTS 3-(4,5-dimethylthiazol-2-yl)-5-(3-

**carboxymethoxyphenyl)-2-(4-sulfophenyl)-2H-tetrazolium) assay.** Results are presented as percent viable mammalian cells (measured as average absorbance ratio relative to DMSO) which was used as a negative control to determine a baseline measurement for the cytotoxic impact of the compound. The absorbance values represent an average of a minimum of three samples analyzed for each compound. Error bars represent standard deviation values for the absorbance values.

### **Results:**

Compound **20** was highly tolerable to Vero cells and caco-2 cells at higher concentrations. Its 50% cytotoxic concentration (CC<sub>50</sub>), the compound's concentration (µg/mL) required for the reduction of cell viability by 50%, is greater than 64 µg/mL at which about 85% and 65% of the cells were viable respectively.

Dr\_AbdelrhmanSaqlha-MO\_PROTON\_01  
Dr\_AbdelrhmanSaqlha-MO

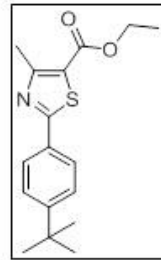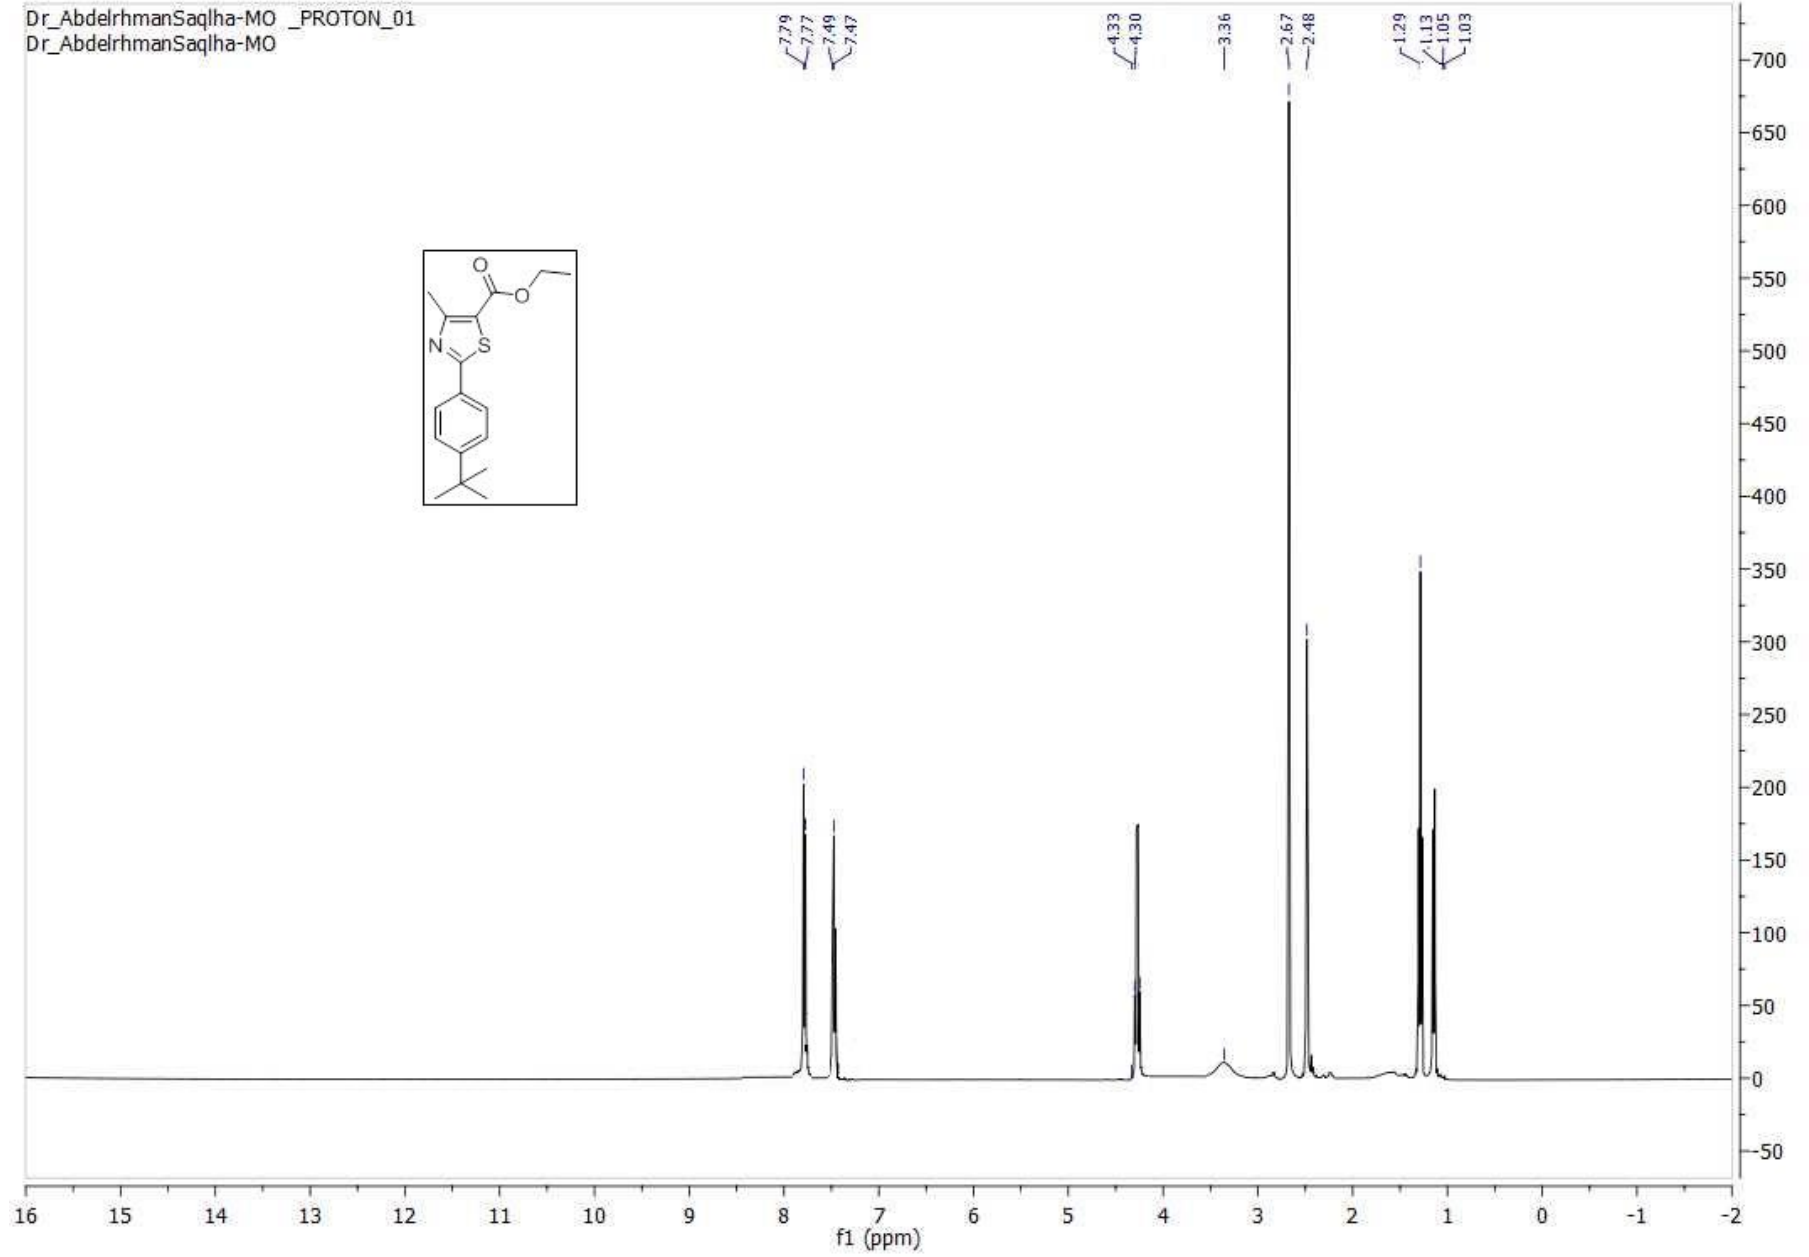

Dr\_AbdelrhmanSaqIha-MOX\_CARBON\_01  
Dr\_AbdelrhmanSaqIha-MOX

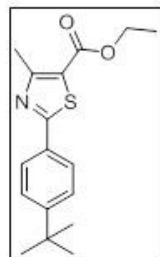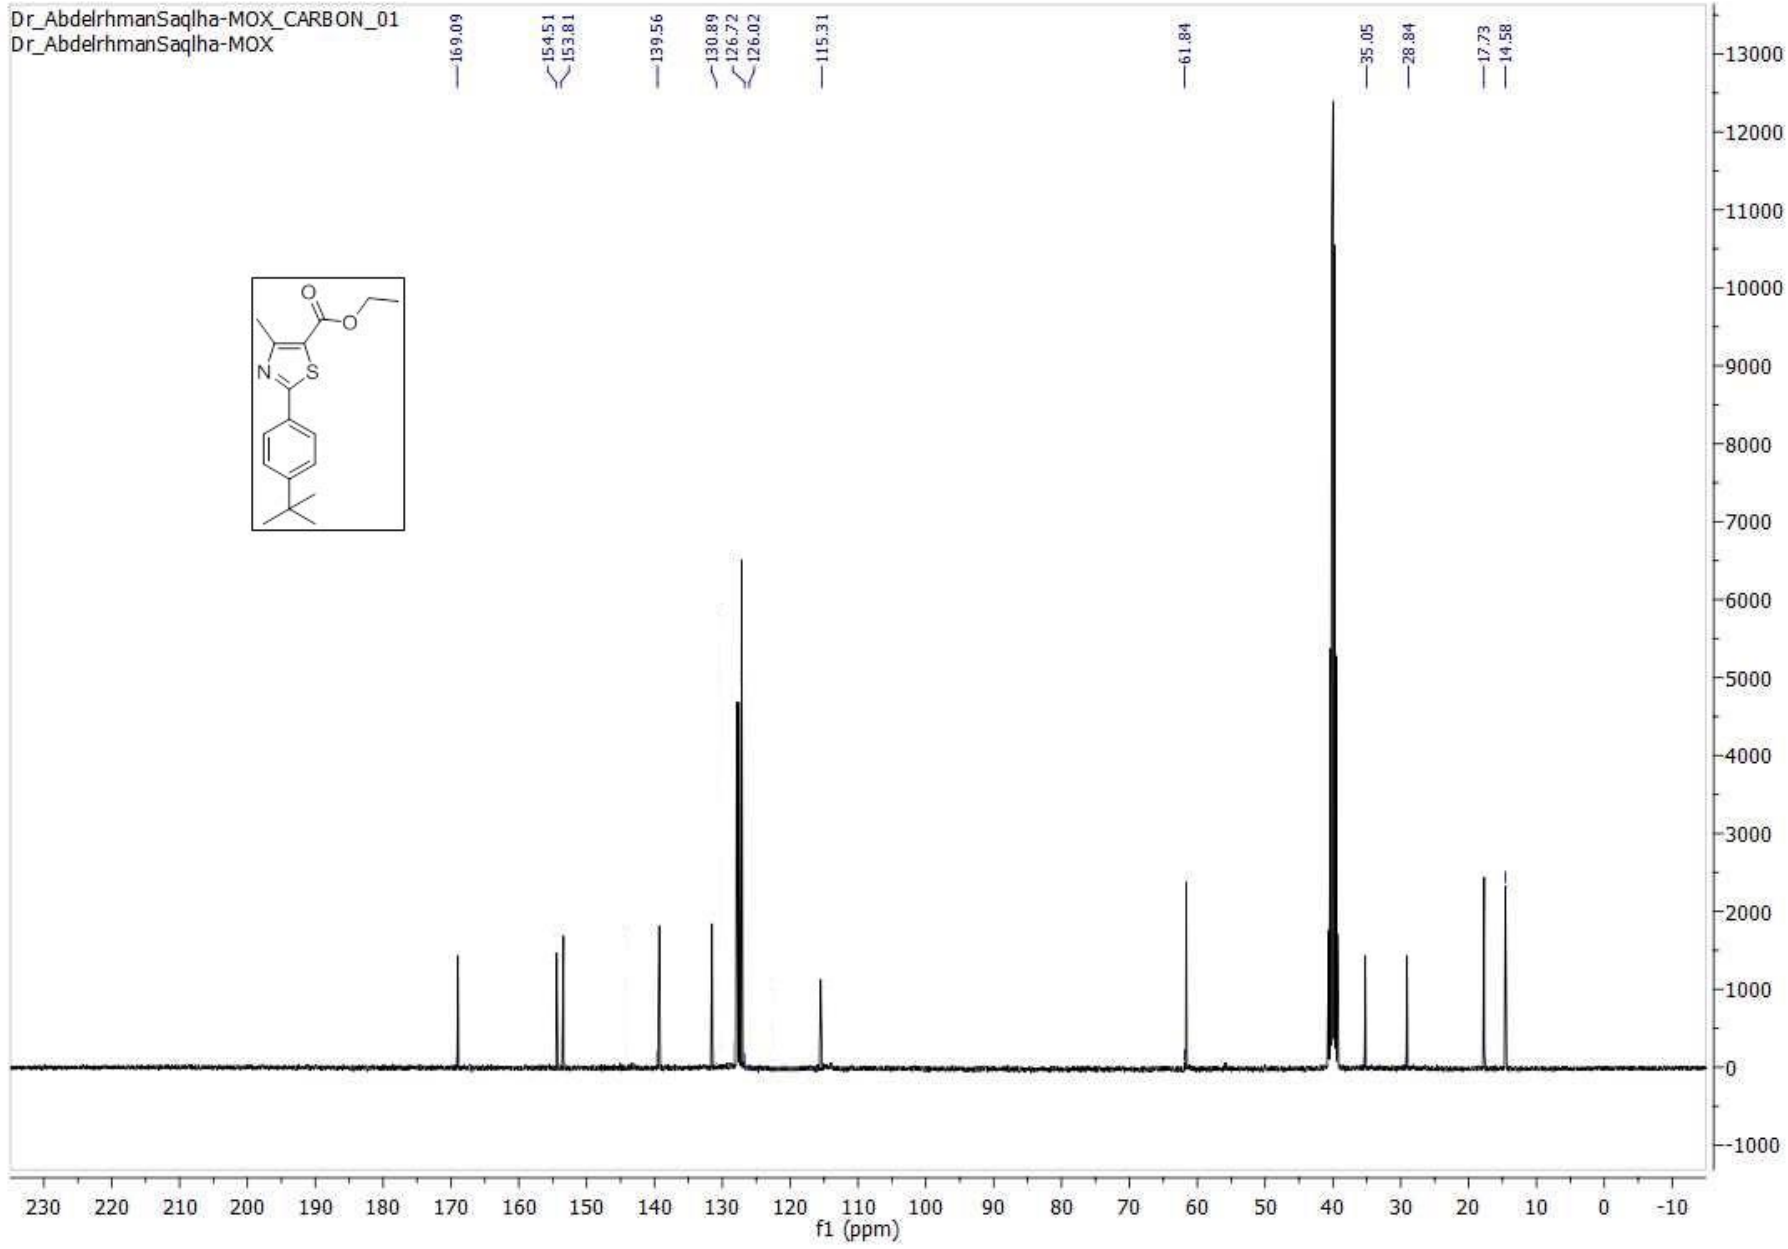

Dr\_EmanYahia-MOX1\_PROTON\_01  
Dr\_EmanYahia-MOX1

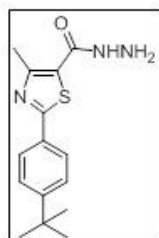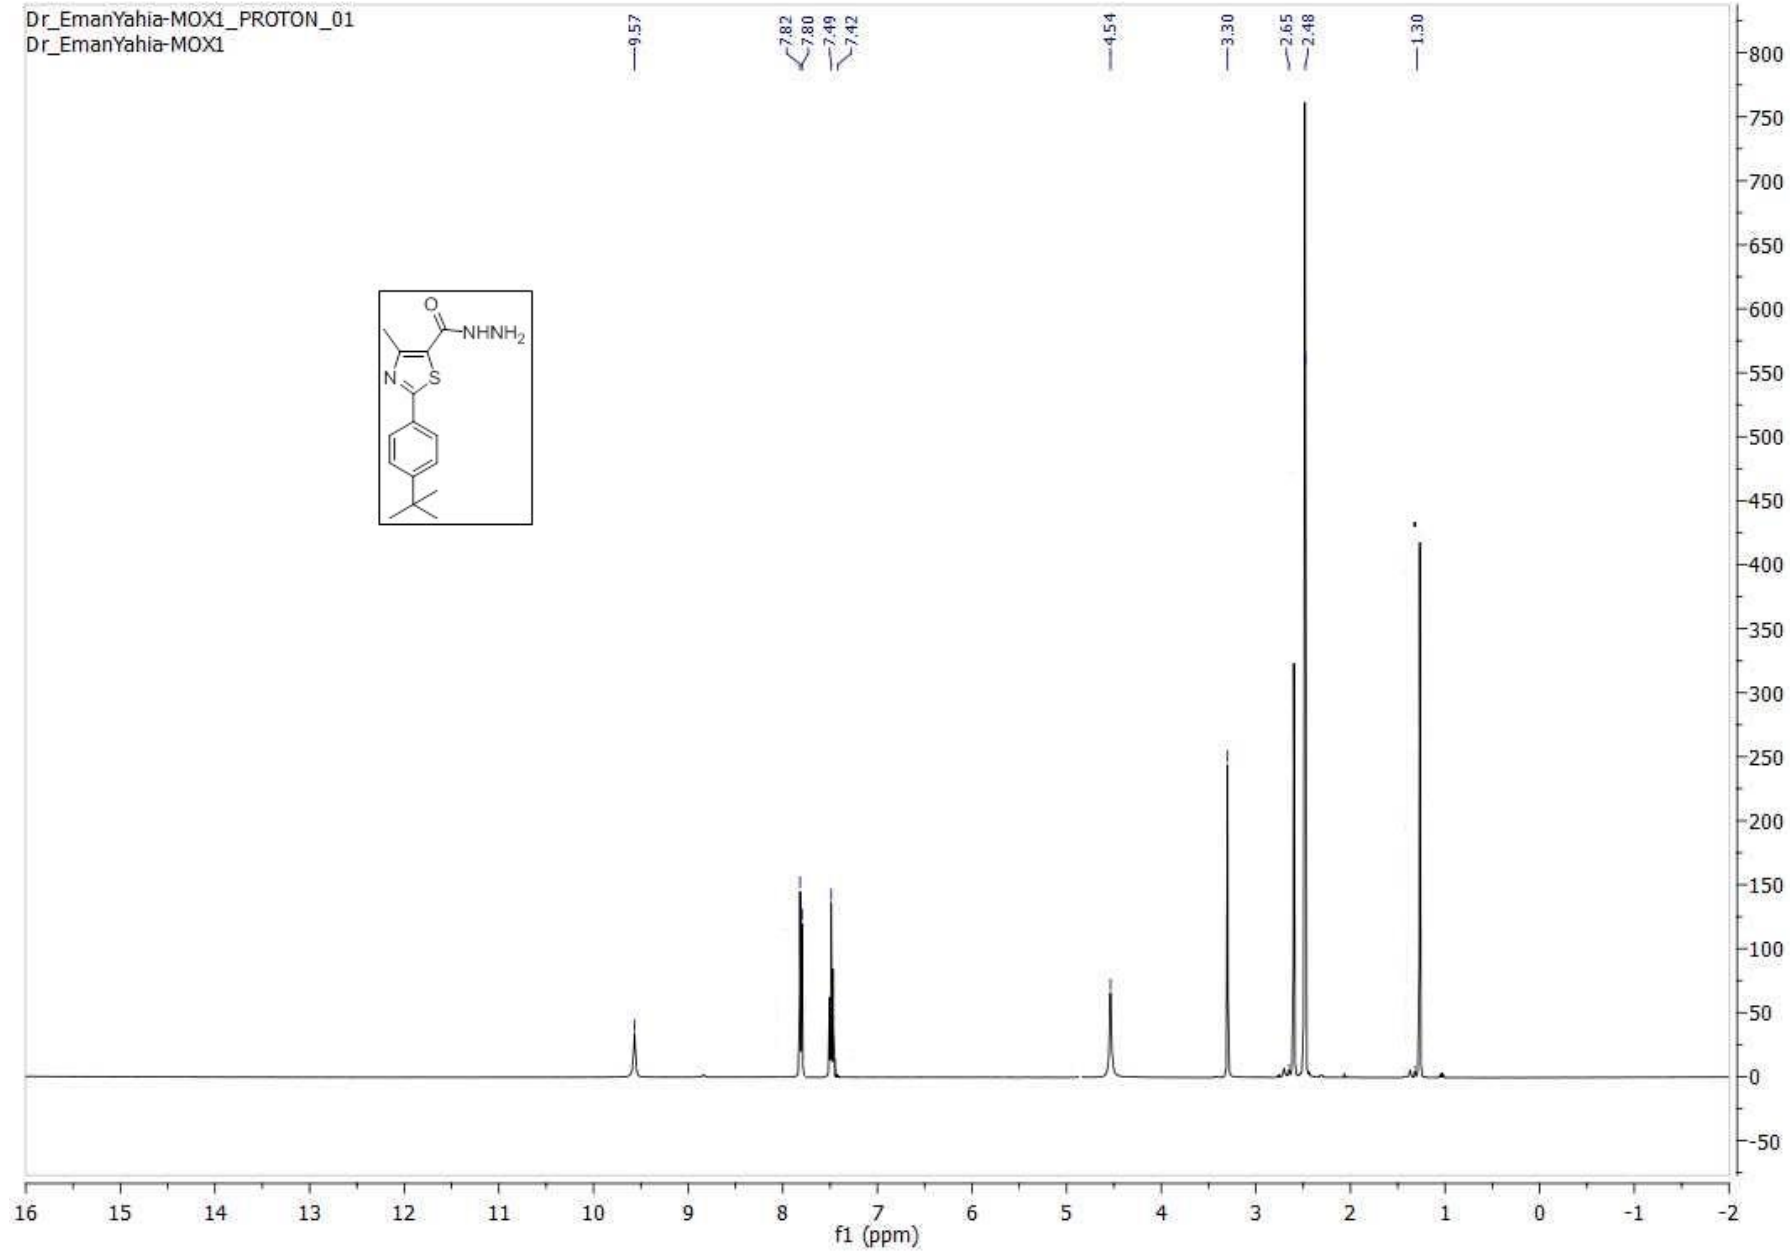

dr\_EmanYahia-MOX1\_CARBON\_01  
dr\_EmanYahia-MOX1

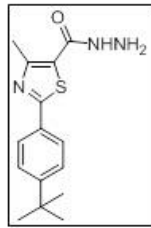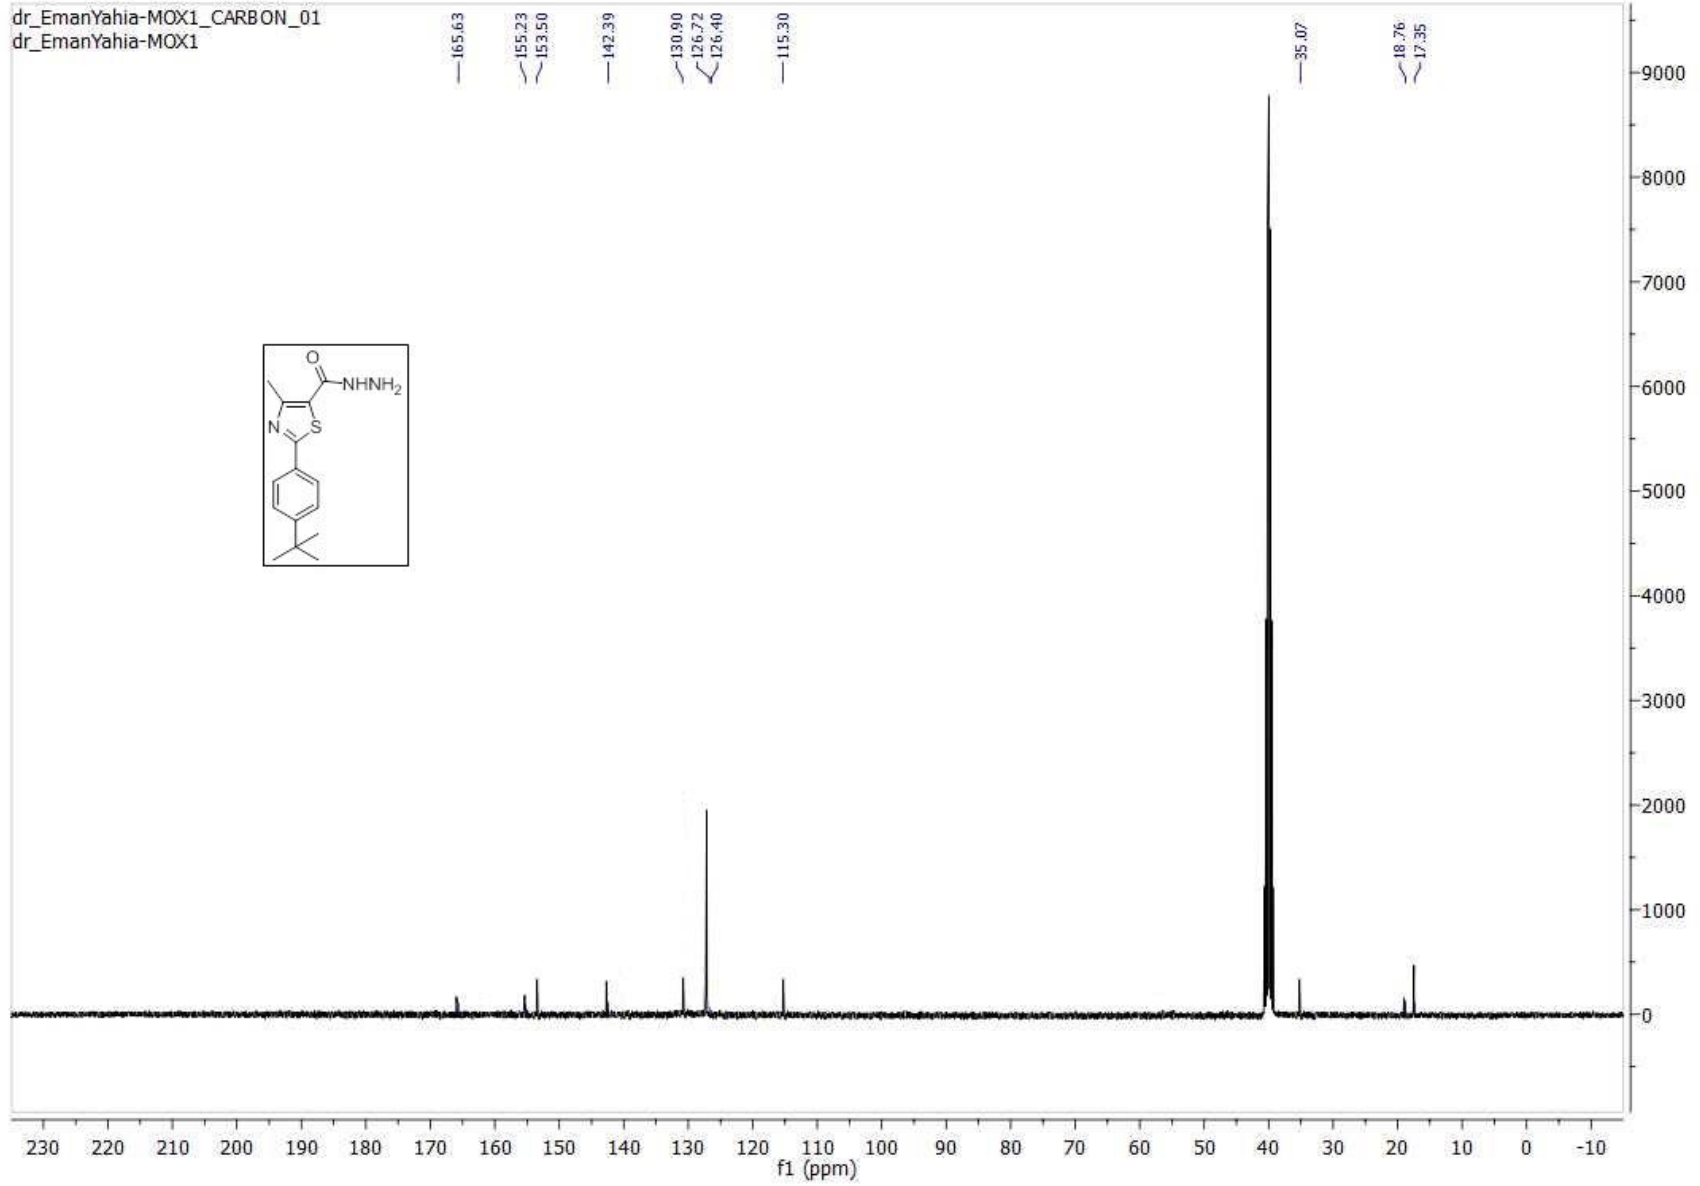



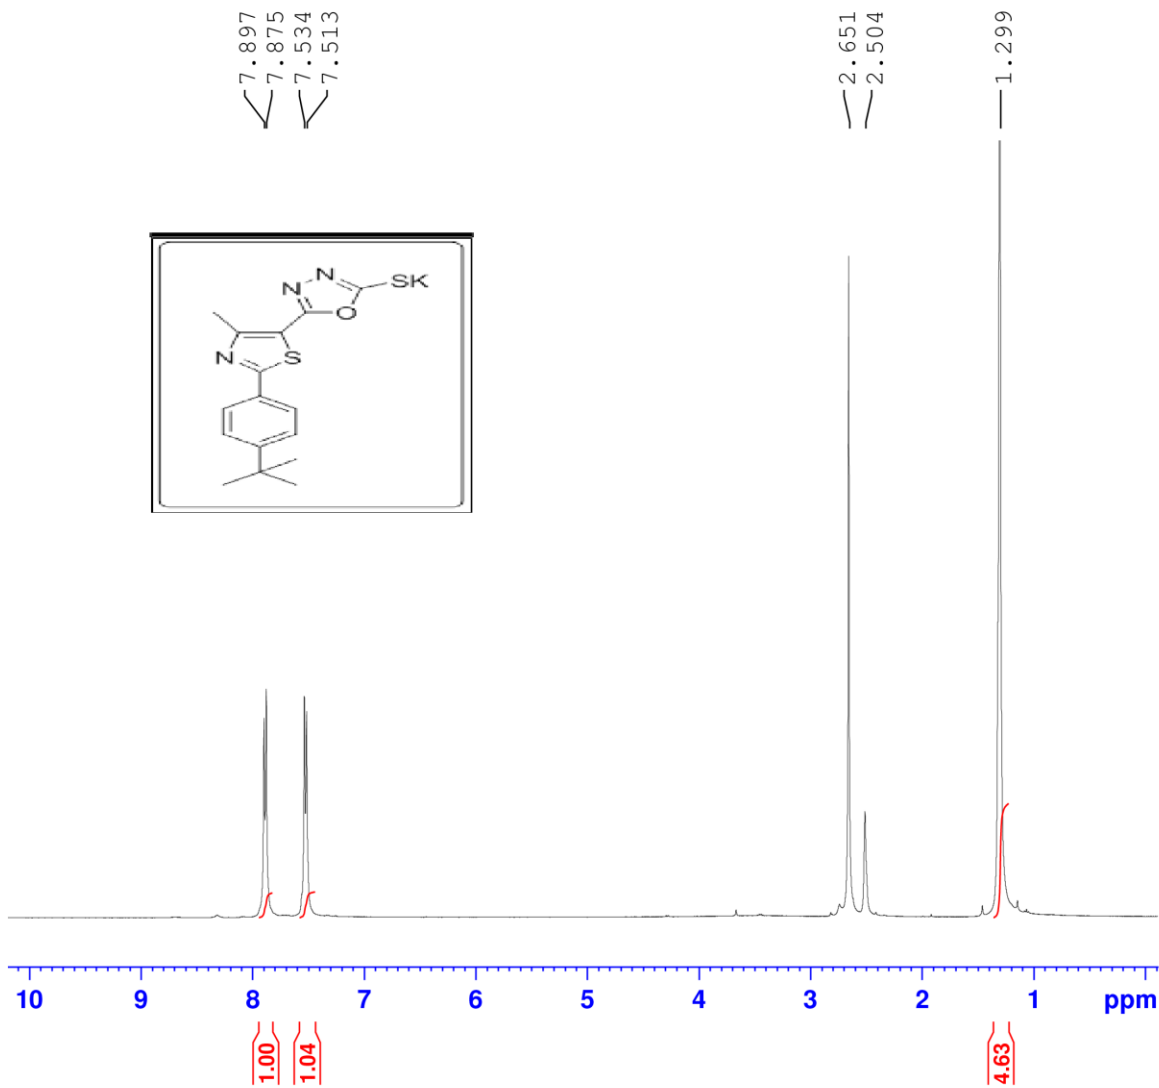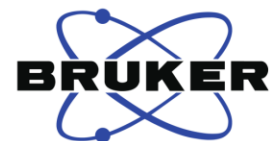

Current Data Parameters  
 NAME sebaey-Qt-64  
 EXPNO 1  
 PROCNO 1

F2 - Acquisition Parameters  
 Date\_ 20171219  
 Time 10.52  
 INSTRUM spect  
 PROBHD 5 mm PABBO BB/  
 PULPROG zg30  
 TD 65536  
 SOLVENT DMSO  
 NS 61  
 DS 2  
 SWH 8012.820 Hz  
 FIDRES 0.122266 Hz  
 AQ 4.0894465 sec  
 RG 205.37  
 DW 62.400 usec  
 DE 6.50 usec  
 TE 298.0 K  
 D1 1.00000000 sec  
 TD0 1

==== CHANNEL f1 =====  
 SFO1 400.1524711 MHz  
 NUC1 1H  
 P1 12.00 usec  
 PLW1 18.00000000 W

F2 - Processing parameters  
 SI 65536  
 SF 400.1500000 MHz  
 WDW EM  
 SSB 0  
 LB 0.30 Hz  
 GB 0  
 PC 1.00

Mohamed Mostafa\_C\_MAS-2-21

Microanalytical Unit - FOPCU - NMR laboratory  
www.pharma.cu.edu.eg dir-mau.fopcu@pharma.cu.edu.eg

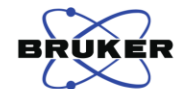

167.66  
159.44  
158.07  
155.17  
154.38  
130.29  
126.64  
126.58  
111.72  
40.56  
40.36  
40.15  
39.94  
39.73  
39.52  
39.31  
35.16  
31.32  
18.77

Current Data Parameters  
NAME Mohamed Mostafa\_C\_MAS-2  
EXPNO 10  
PROCNO 1

F2 - Acquisition Parameters  
Date\_ 20171116  
Time 21.44  
INSTRUM spect  
PROBHD 5 mm PABBO BB/  
PULPROG zgpg30  
TD 65536  
SOLVENT DMSO  
NS 1200  
DS 4  
SWH 24038.461 Hz  
FIDRES 0.366798 Hz  
AQ 1.3631488 sec  
RG 202.37  
DW 20.800 usec  
DE 6.50 usec  
TE 298.0 K  
D1 2.00000000 sec  
D11 0.03000000 sec  
TD0 1

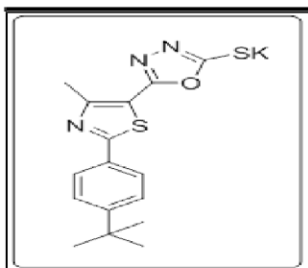

==== CHANNEL f1 =====  
SFO1 100.6379178 MHz  
NUC1 13C  
P1 10.00 usec  
PLW1 45.00000000 W  
==== CHANNEL f2 =====  
SFO2 400.1916008 MHz  
NUC2 1H  
CPDPRG[2] waltz16

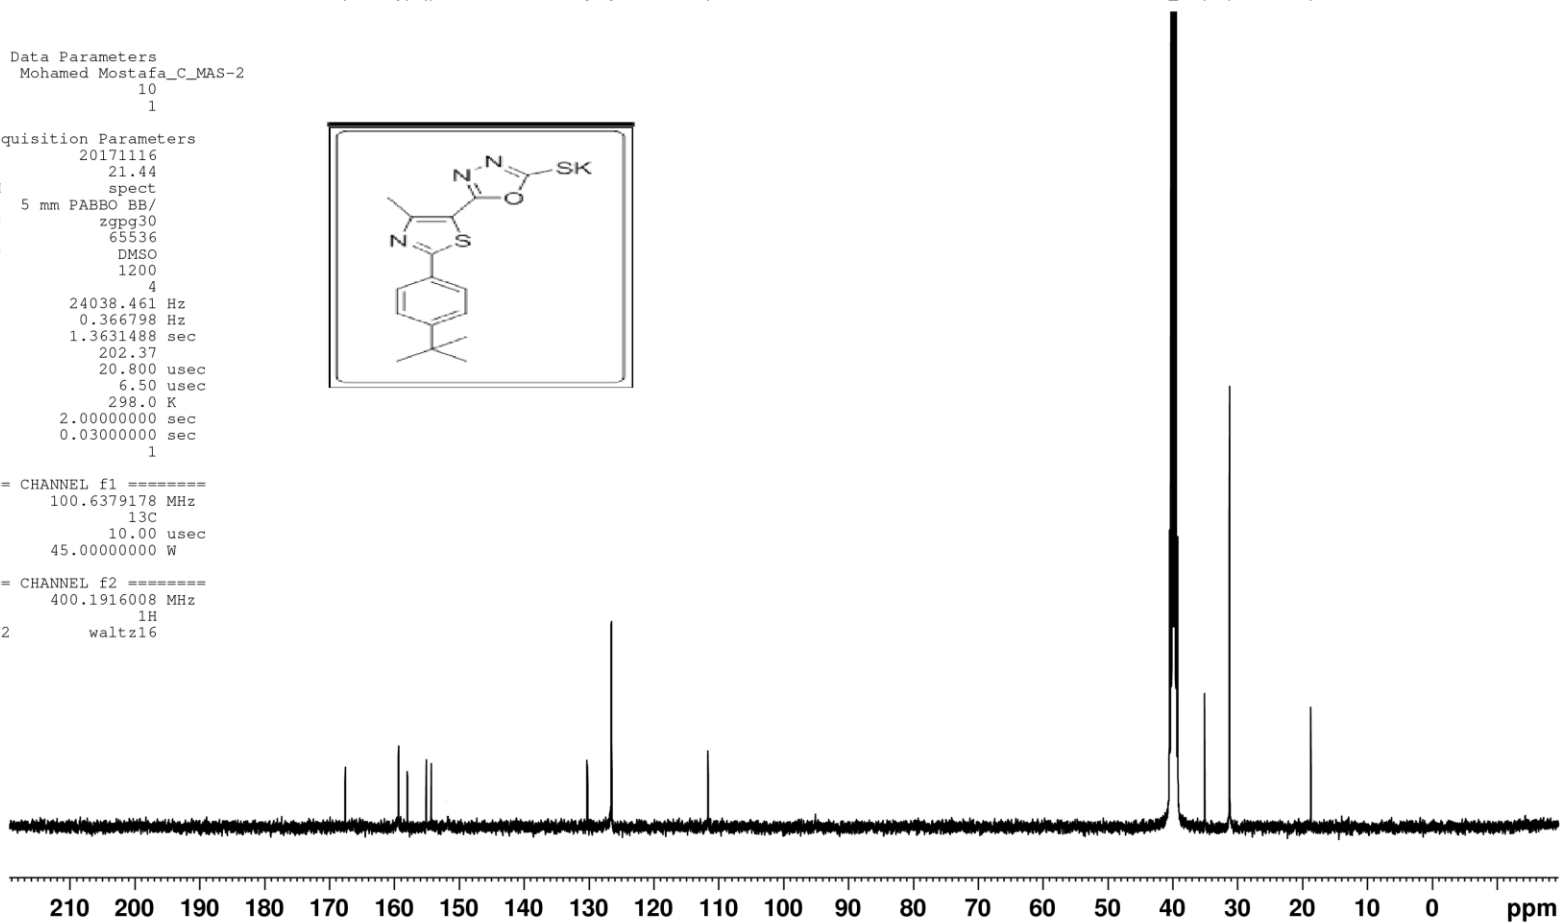

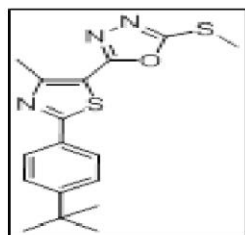

7.933  
7.915  
7.565  
7.545

3.336  
2.773  
2.722  
2.682  
2.510

1.317

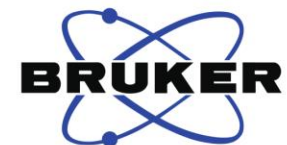

Current Data Parameters  
NAME sebaey-Qt-62  
EXPNO 1  
PROCNO 1

F2 - Acquisition Parameters  
Date\_ 20171219  
Time 10.43  
INSTRUM spect  
PROBHD 5 mm PABBO BB/  
PULPROG zg30  
TD 65536  
SOLVENT DMSO  
NS 64  
DS 2  
SWH 8012.820 Hz  
FIDRES 0.122266 Hz  
AQ 4.0894465 sec  
RG 205.37  
DW 62.400 usec  
DE 6.50 usec  
TE 298.0 K  
D1 1.00000000 sec  
TD0 1

===== CHANNEL f1 =====  
SFO1 400.1524711 MHz  
NUC1 1H  
P1 12.00 usec  
PLW1 18.00000000 W

F2 - Processing parameters  
SI 65536  
SF 400.1500000 MHz  
WDW EM  
SSB 0  
LB 0.30 Hz  
GB 0  
PC 1.00

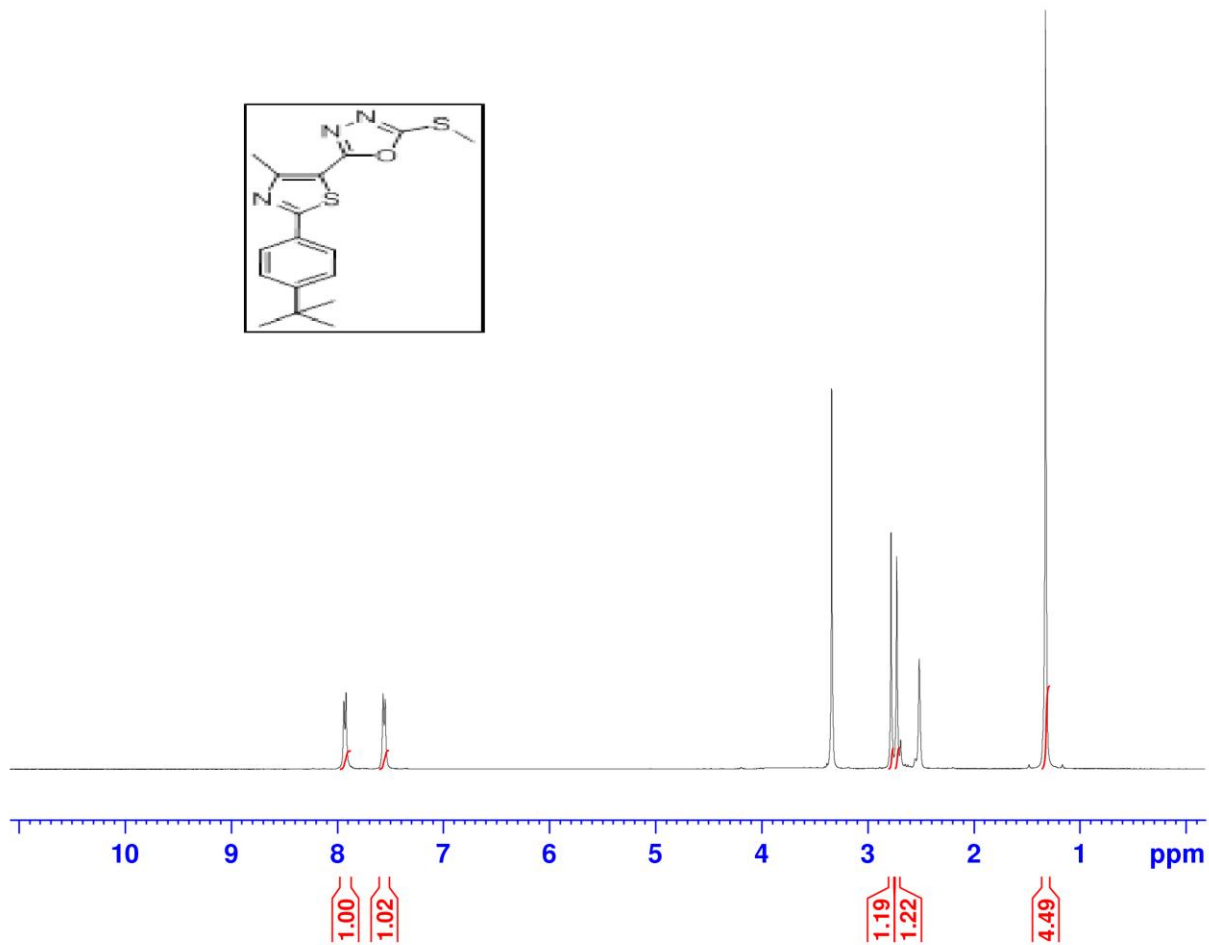

Dr\_AbdelrhmanSalha-MAS2-26\_CARBON\_01  
Dr\_AbdelrhmanSalha-MAS2-26

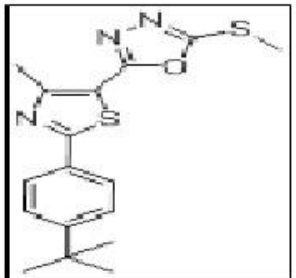

166.59  
162.95  
159.40  
153.98  
153.42  
130.58  
126.51  
126.43  
106.58

40.59  
40.38  
40.17  
39.96  
39.76  
39.55  
39.34  
35.11  
31.33  
28.25  
18.67

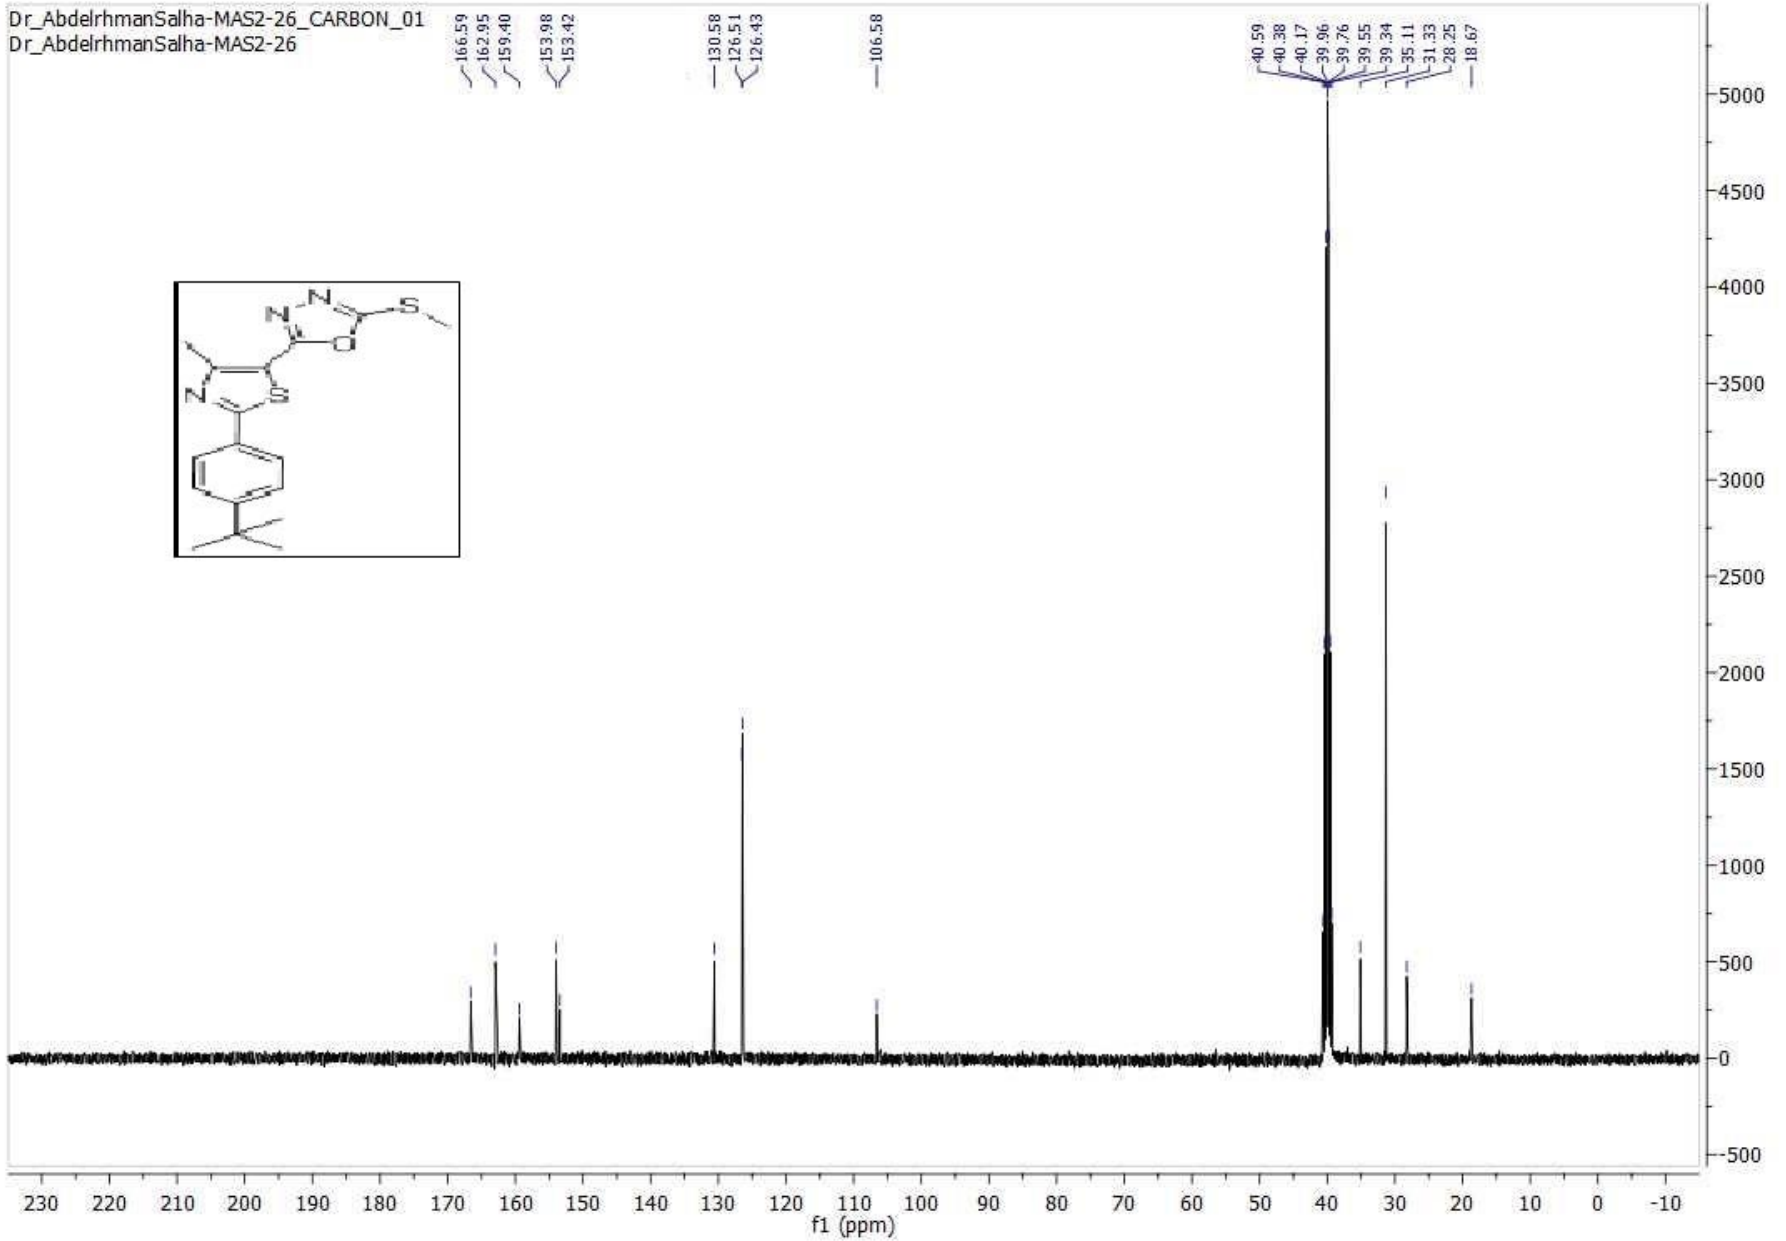

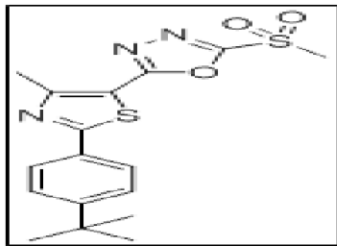

7.981  
7.965  
7.885  
7.876  
7.865  
7.827  
7.814  
7.505  
7.488

3.472  
2.782  
2.764  
2.514

1.292

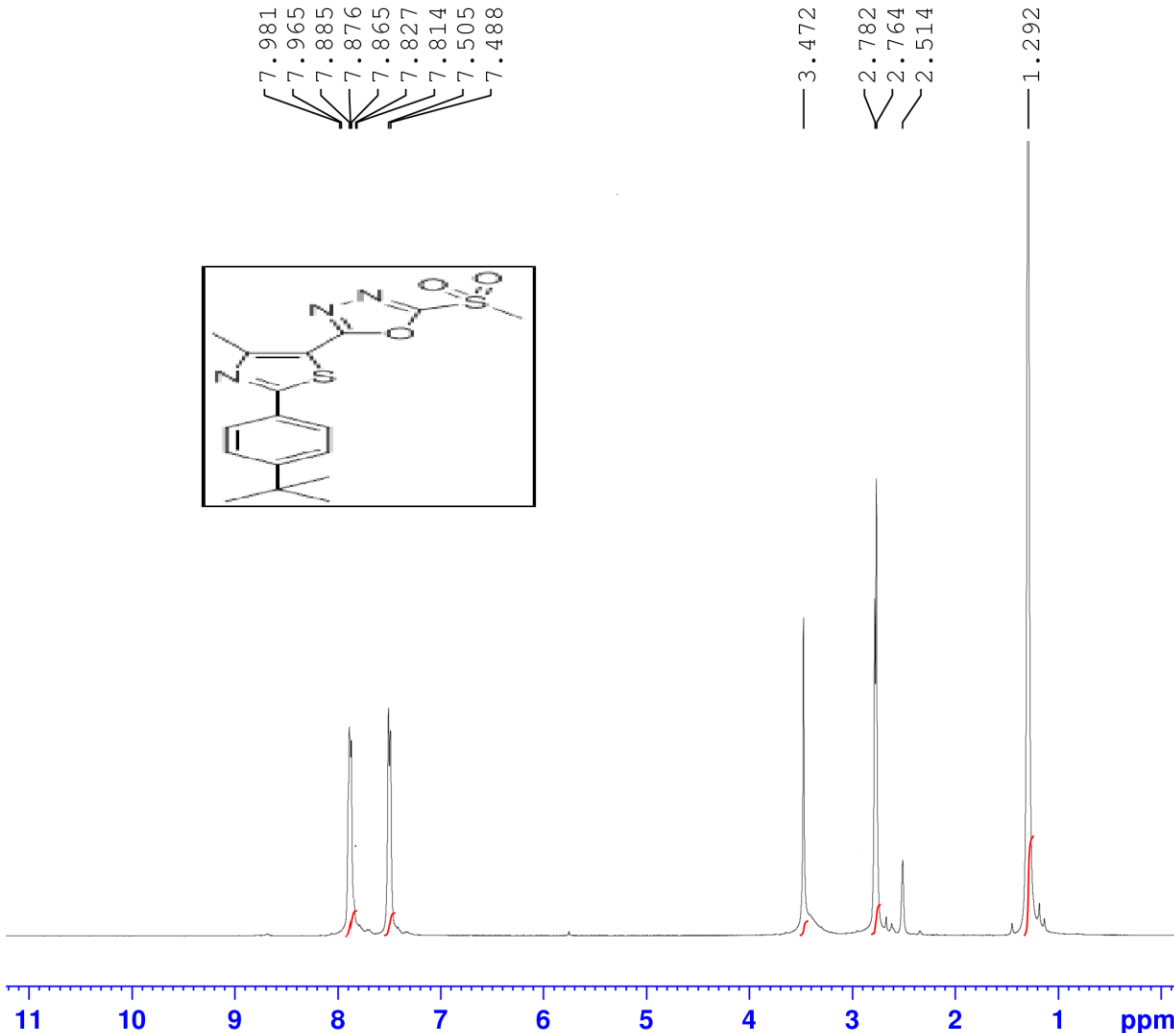

5.38  
5.51

3.61  
7.55

24.11

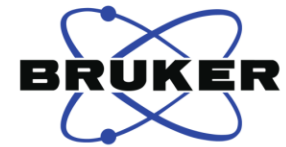

Current Data Parameters  
NAME sebaey-Qt-67  
EXPNO 1  
PROCNO 1

F2 - Acquisition Parameters  
Date\_ 20171220  
Time 11.33  
INSTRUM spect  
PROBHD 5 mm PABBO BB/  
PULPROG zg30  
TD 65536  
SOLVENT DMSO  
NS 64  
DS 2  
SWH 8012.820 Hz  
FIDRES 0.122266 Hz  
AQ 4.0894465 sec  
RG 205.37  
DW 62.400 usec  
DE 6.50 usec  
TE 300.0 K  
D1 1.00000000 sec  
TD0 1

===== CHANNEL f1 =====  
SFO1 400.1524711 MHz  
NUC1 1H  
P1 12.00 usec  
PLW1 18.00000000 W

F2 - Processing parameters  
SI 65536  
SF 400.1500000 MHz  
WDW EM  
SSB 0  
LB 0.30 Hz  
GB 0  
PC 1.00

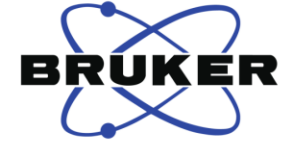

Current Data Parameters  
NAME sebaey-Qt-67  
EXPNO 2  
PROCNO 1

F2 - Acquisition Parameters  
Date\_ 20171220  
Time 12.44  
INSTRUM spect  
PROBHD 5 mm PABBO BB/  
PULPROG zgpg30  
TD 65536  
SOLVENT DMSO  
NS 1181  
DS 4  
SWH 24038.461 Hz  
FIDRES 0.366798 Hz  
AQ 1.3631488 sec  
RG 205.37  
DW 20.800 usec  
DE 6.50 usec  
TE 300.0 K  
D1 2.0000000 sec  
D11 0.0300000 sec  
TD0 1

==== CHANNEL f1 =====  
SFO1 100.6278588 MHz  
NUC1 13C  
P1 10.00 usec  
PLW1 47.00000000 W

==== CHANNEL f2 =====  
SFO2 400.1516006 MHz  
NUC2 1H  
CPDPRG[2] waltz16  
PCPD2 90.00 usec  
PLW2 18.00000000 W  
PLW12 0.34722000 W  
PLW13 0.28125000 W

F2 - Processing parameters  
SI 32768  
SF 100.6177975 MHz  
WDW EM  
SSB 0  
LB 1.00 Hz  
GB 0  
PC 1.40

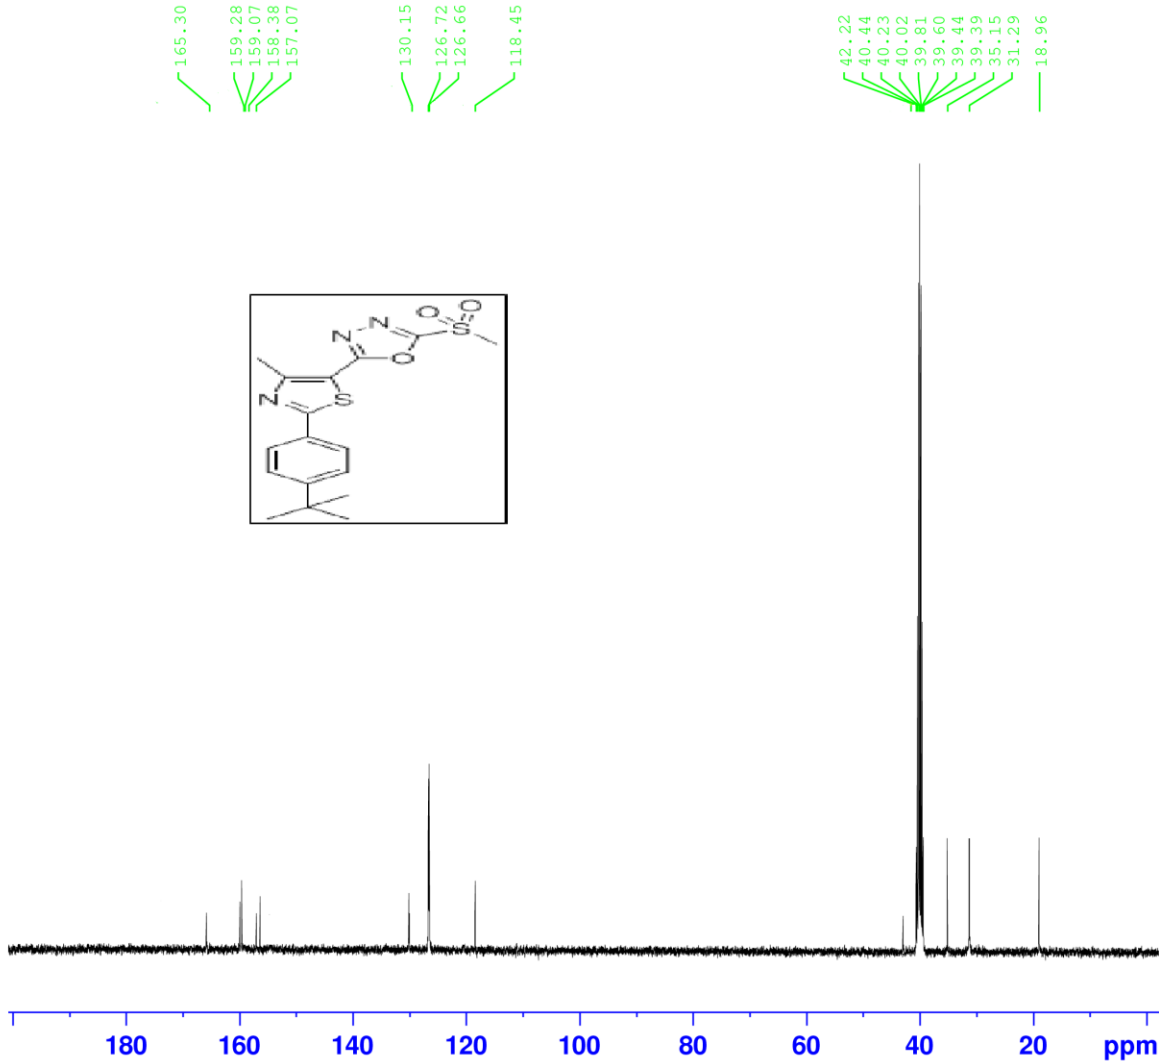

Mohamed Moustafa\_H\_Qt30  
Mohamed Moustafa\_H\_Qt30

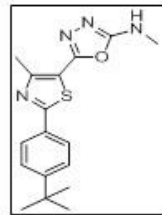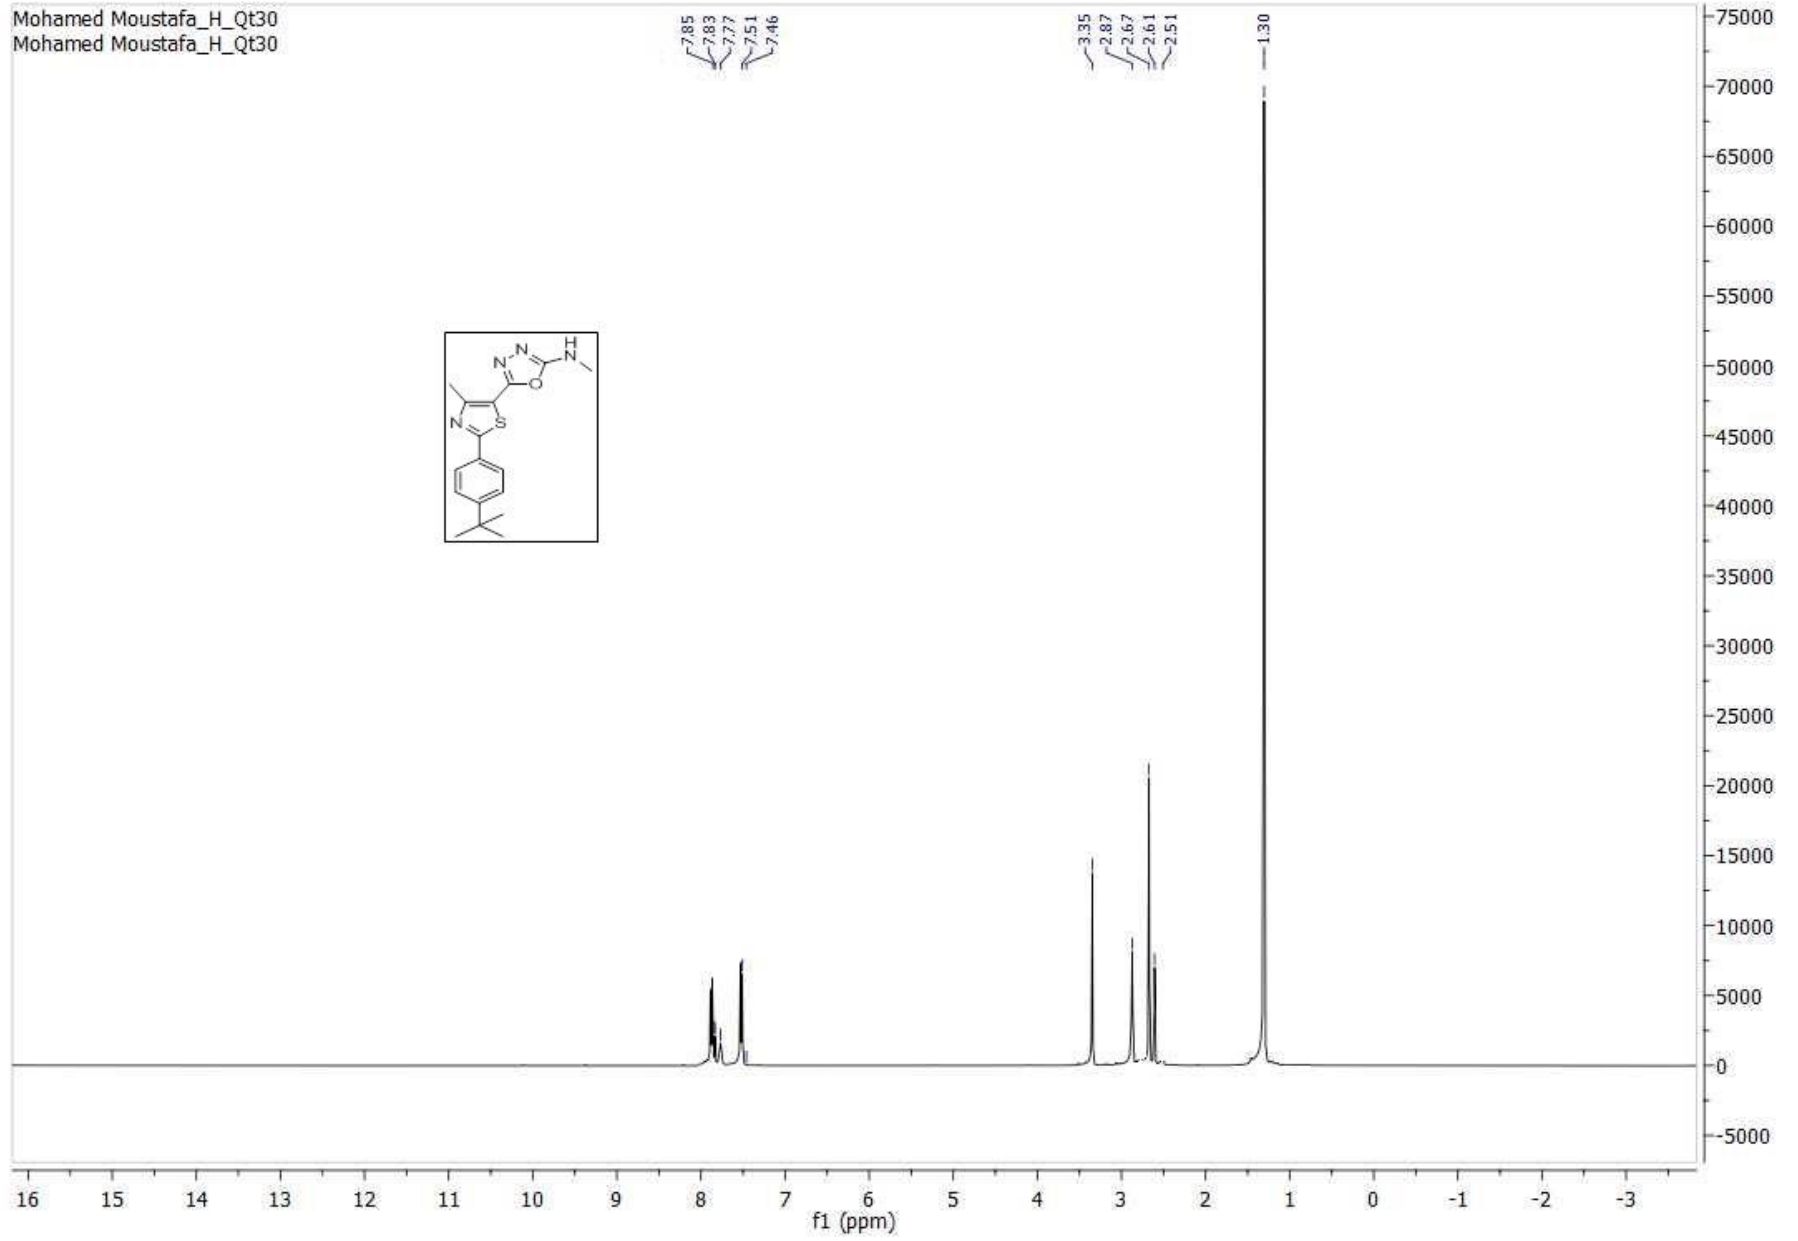

Mohamed Moustafa\_C\_Qt30  
Mohamed Moustafa\_C\_Qt30

166.13  
164.23  
154.34  
154.14  
153.82

130.05  
126.58  
126.50  
115.03

40.63  
40.42  
40.21  
40.00  
39.79  
39.58  
39.38  
35.12  
29.50  
26.86  
17.39

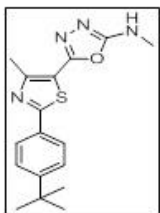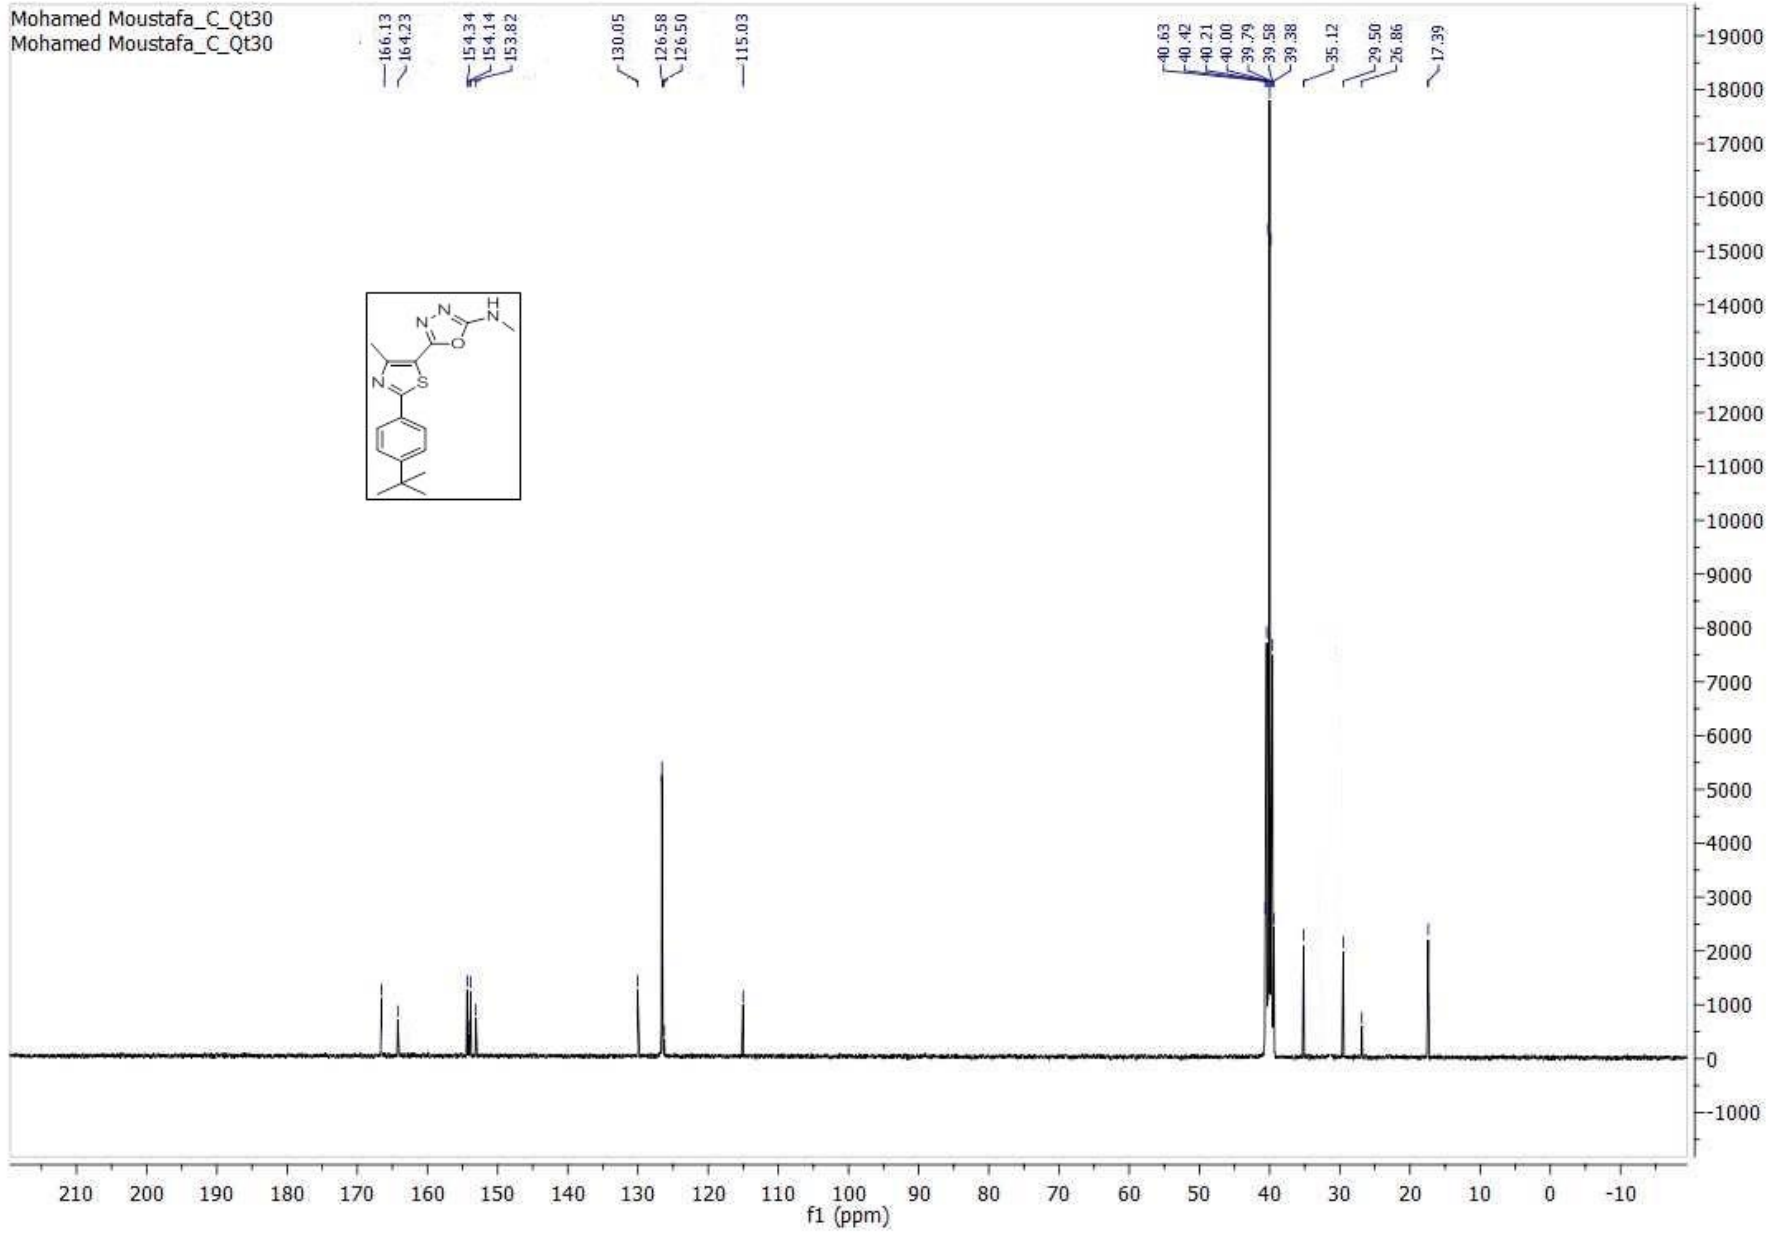



Mohamed Moustafa\_H\_Qt31  
Mohamed Moustafa\_H\_Qt31

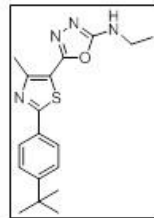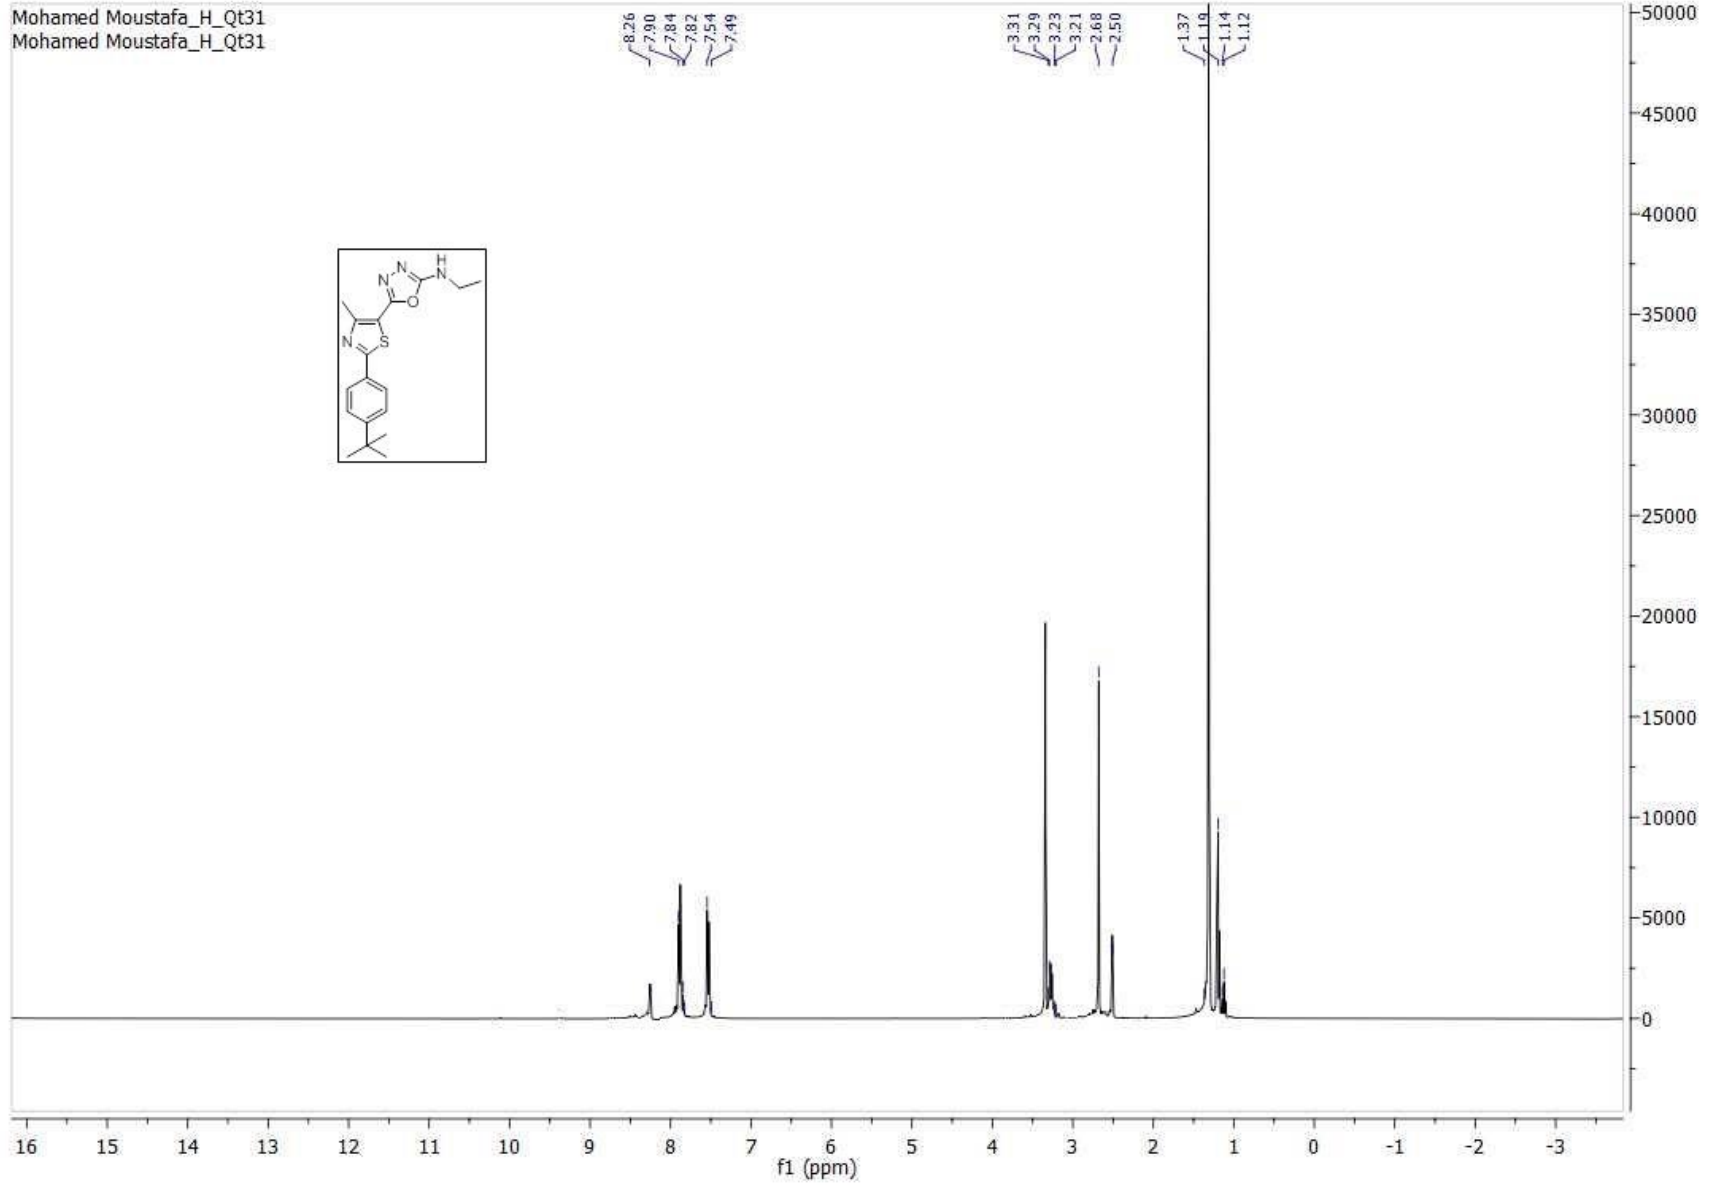

Mohamed Moustafa\_C\_Qt31  
Mohamed Moustafa\_C\_Qt31

166.08  
163.54

154.37  
154.14  
153.79

130.05  
126.85  
126.62

115.06

40.63  
40.42  
40.21  
40.00  
39.79  
39.58  
39.37  
37.96  
34.69  
31.31

17.40  
15.17

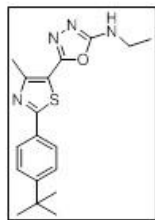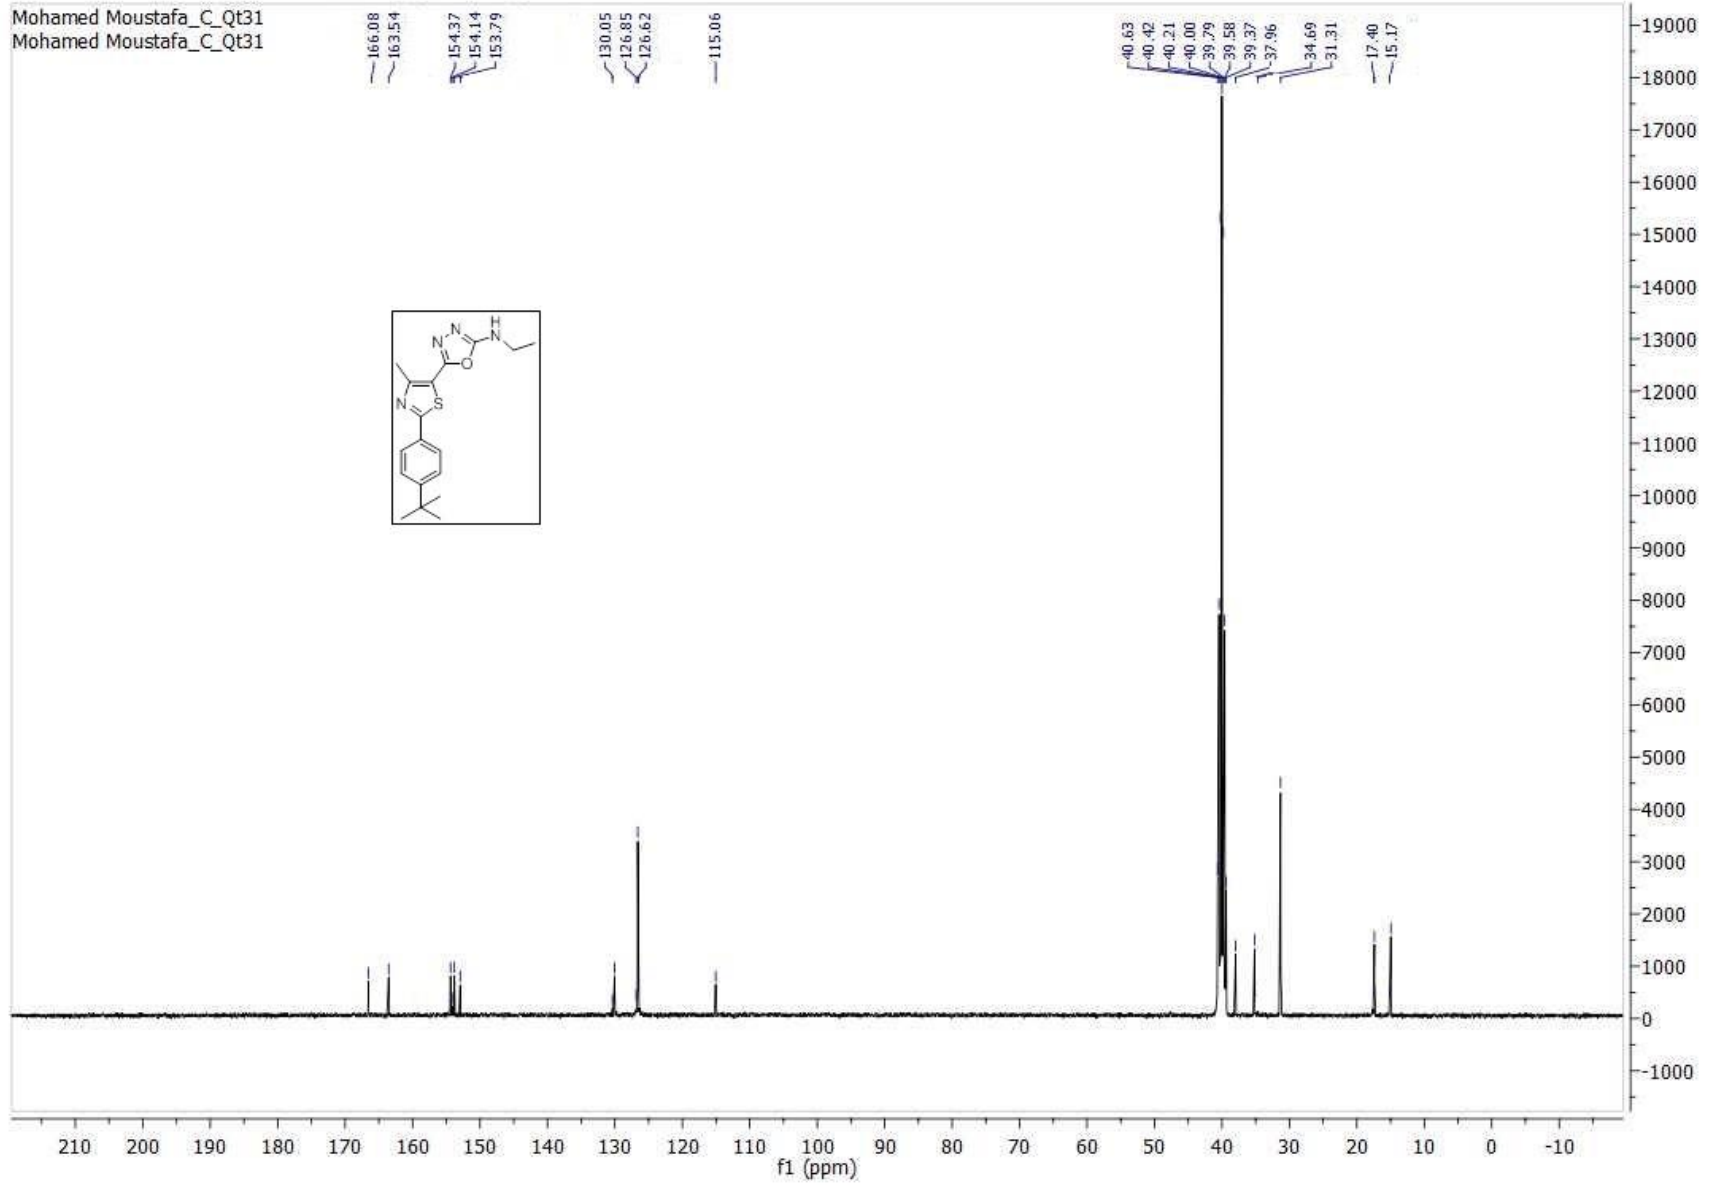

Dr\_AbdelrahmanSaleh-7\_PROTON\_01  
Dr\_AbdelrahmanSaleh-7

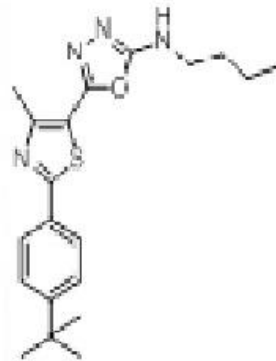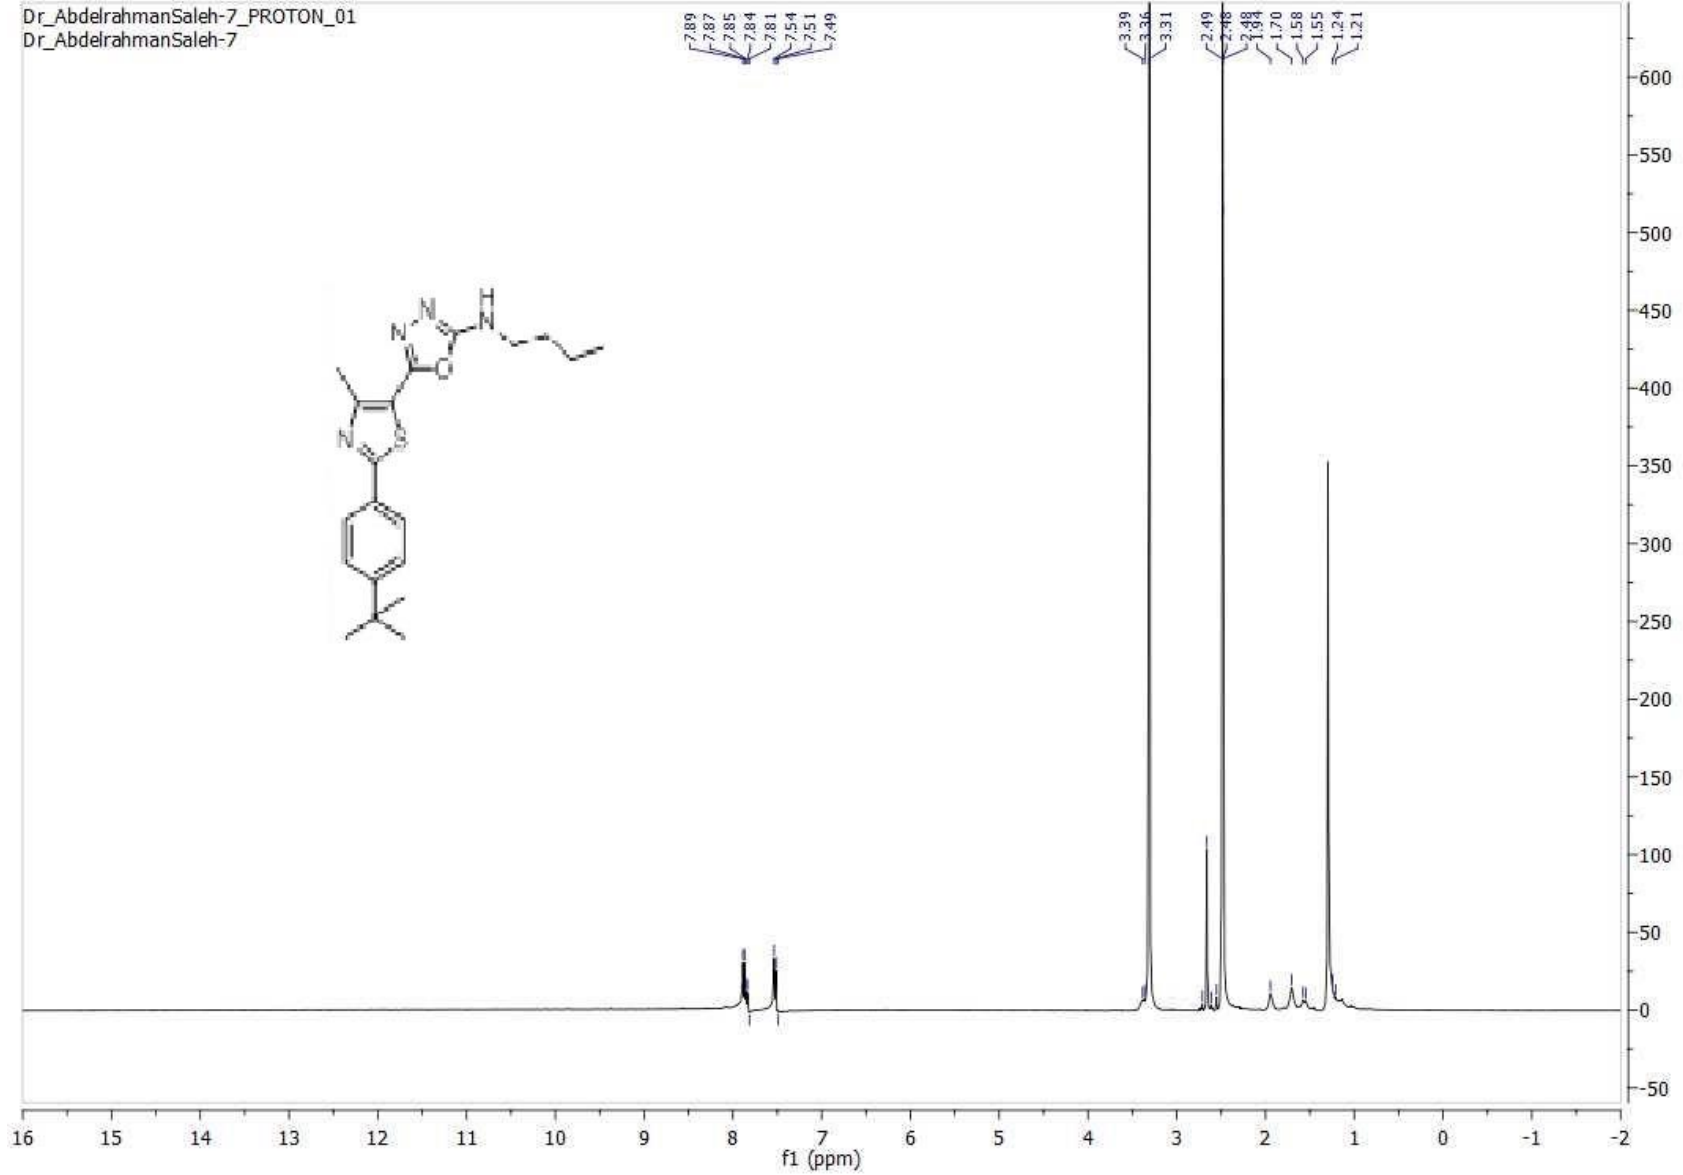

Dr\_AbdelrahmanSaleh-7\_CARBON\_01  
Dr\_AbdelrahmanSaleh-7

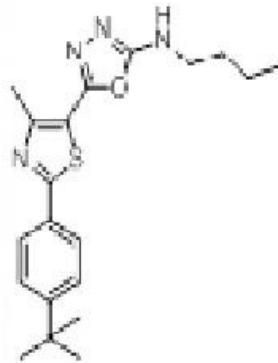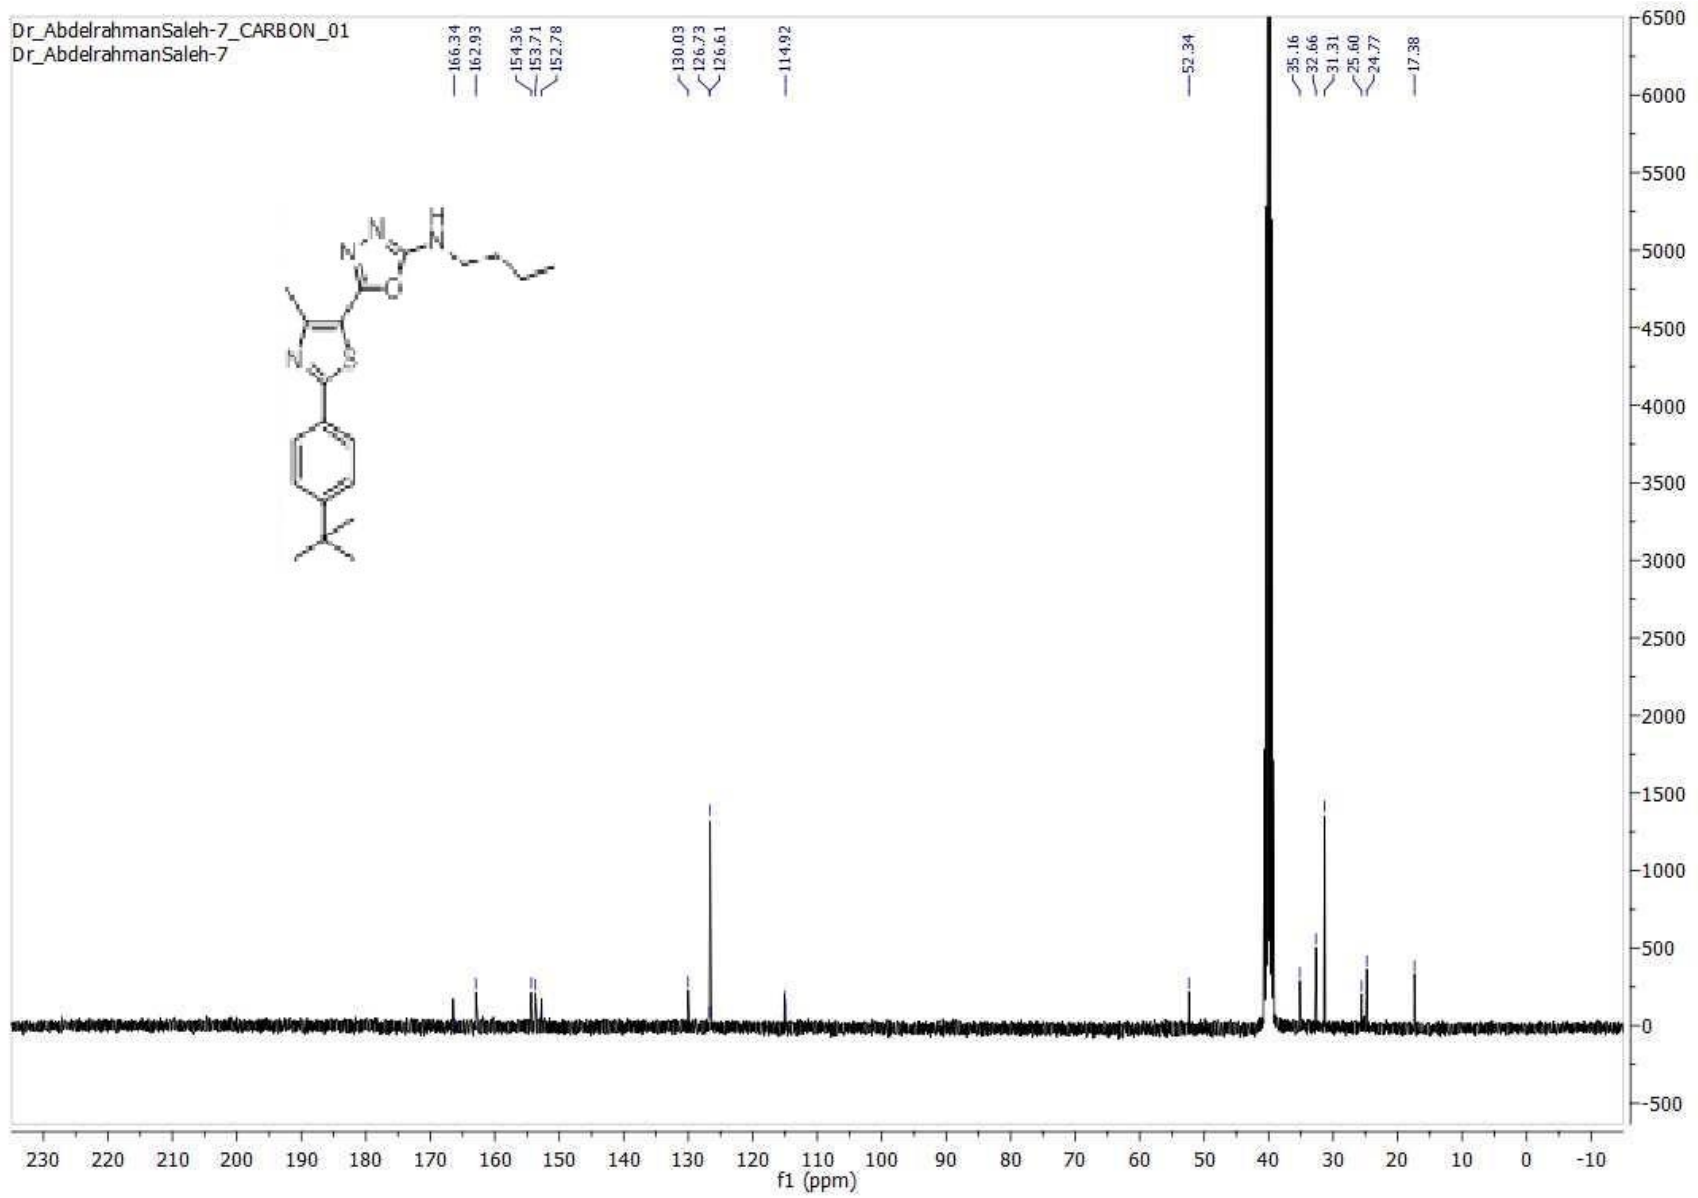

Dr\_AbdelrahmanSaleh-5\_PROTON\_01  
Dr\_AbdelrahmanSaleh-5

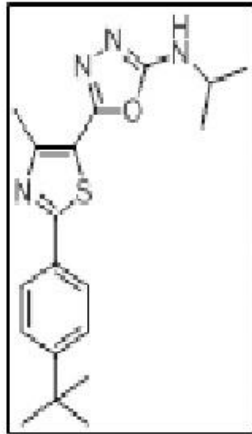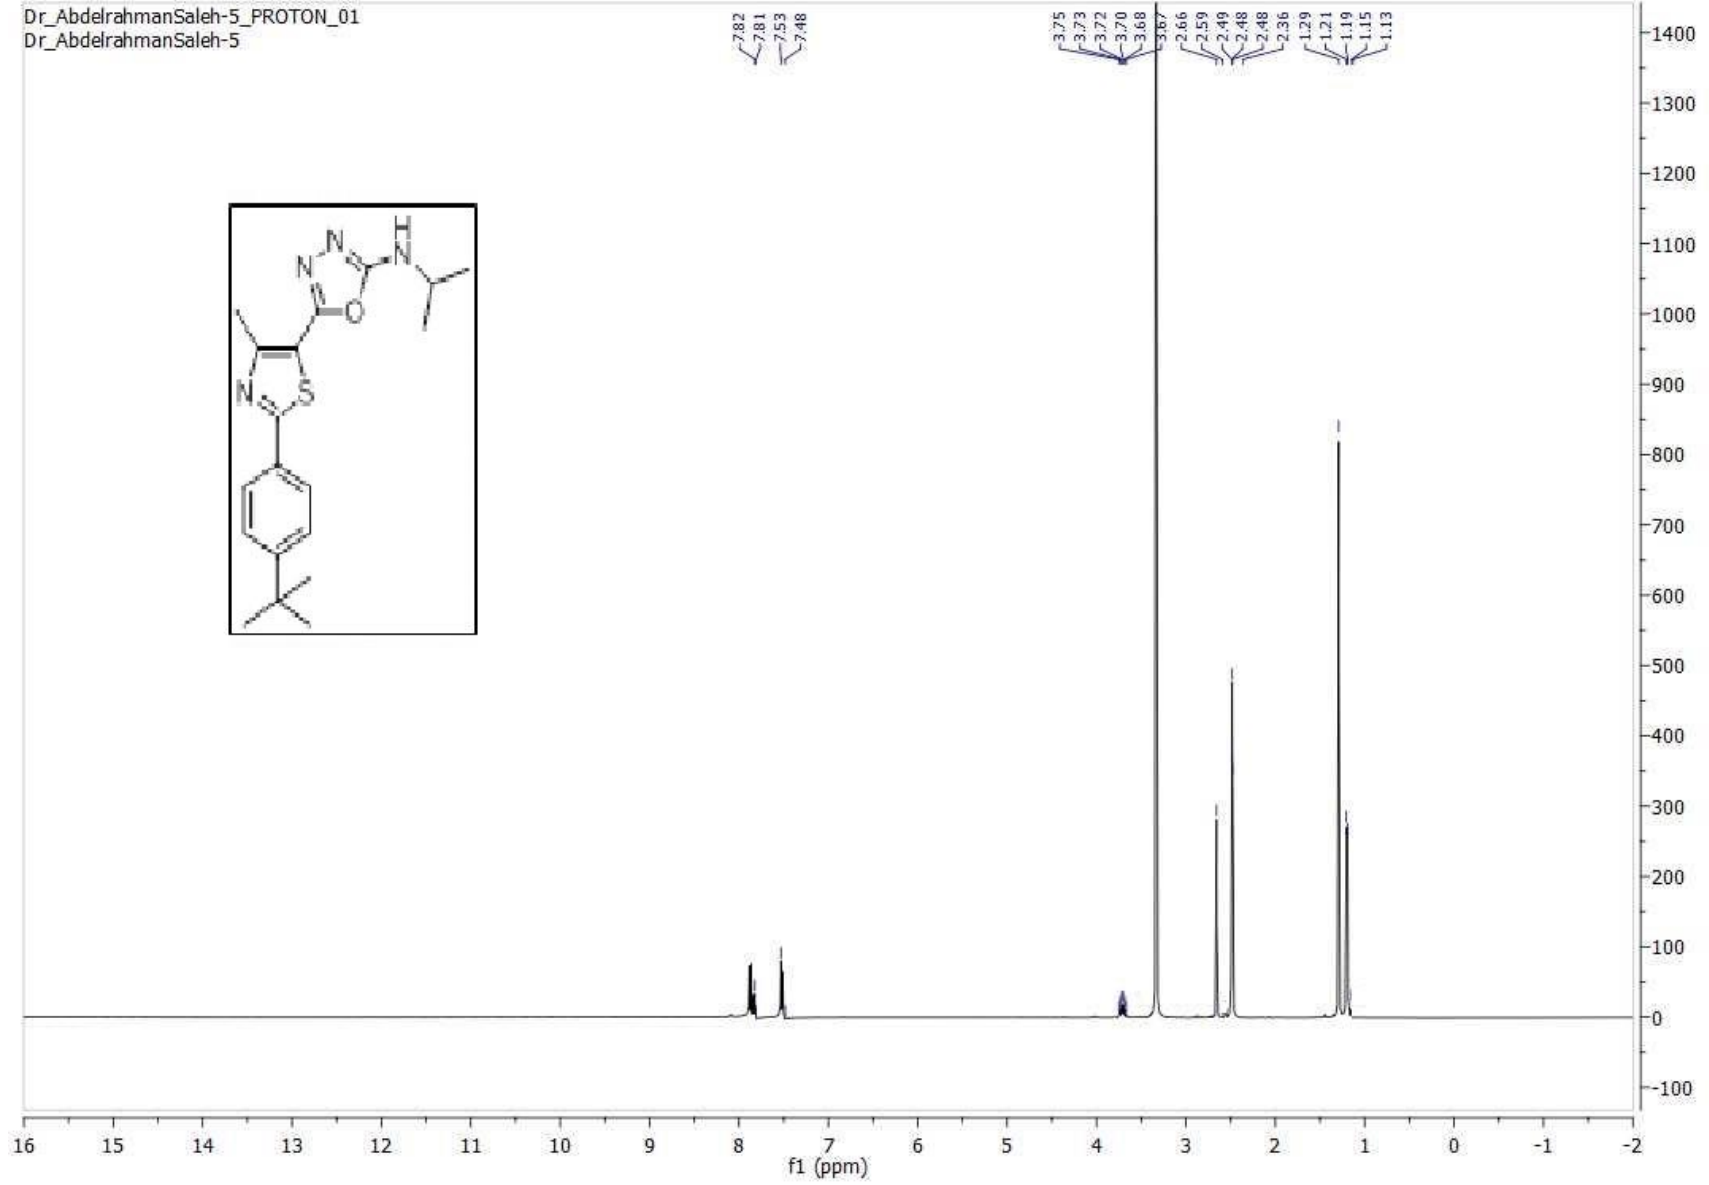

Dr\_AbdelrahmanSaleh-5\_CARBON\_01  
Dr\_AbdelrahmanSaleh-5

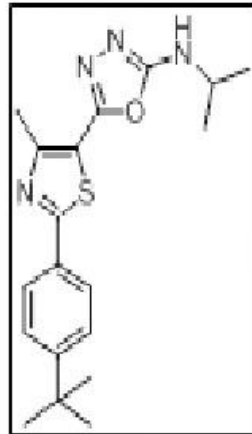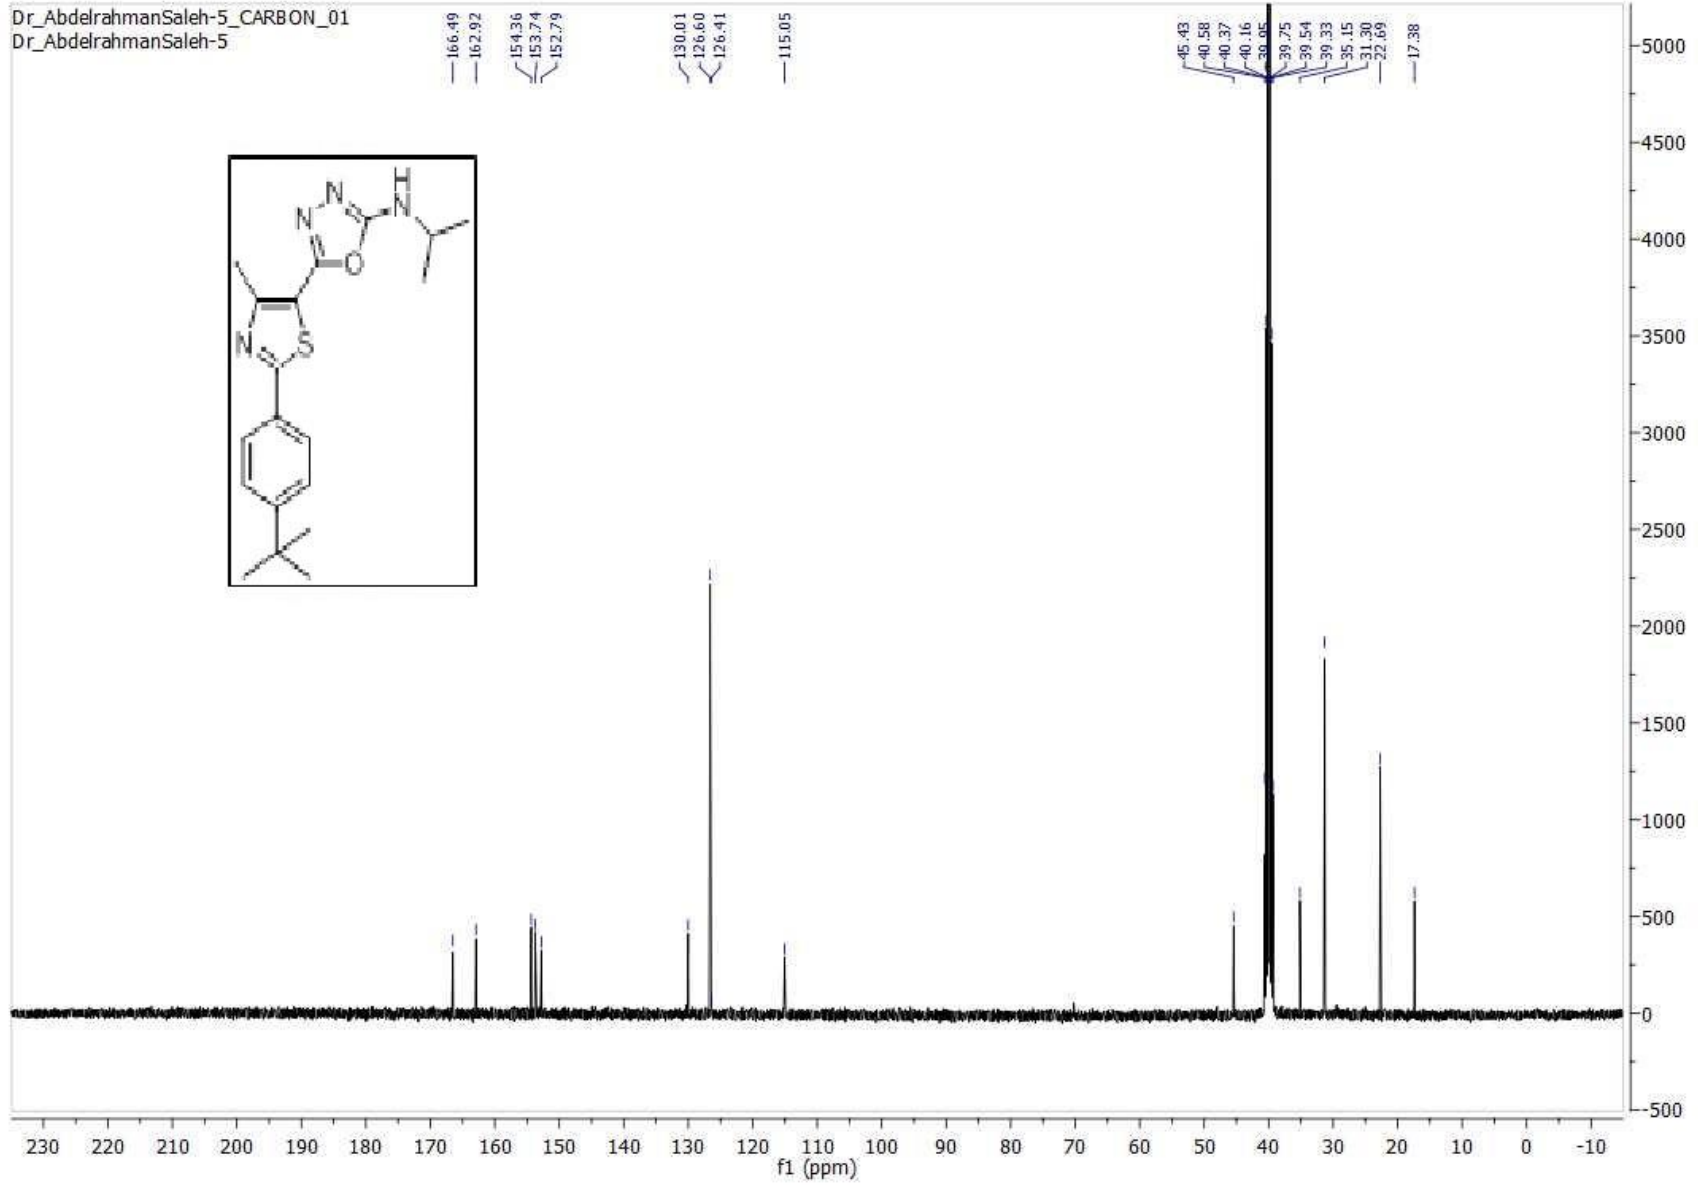

Dr\_AbdelrahmanSaleh-3\_PROTON\_01  
Dr\_AbdelrahmanSaleh-3

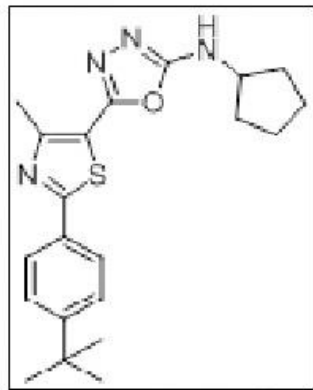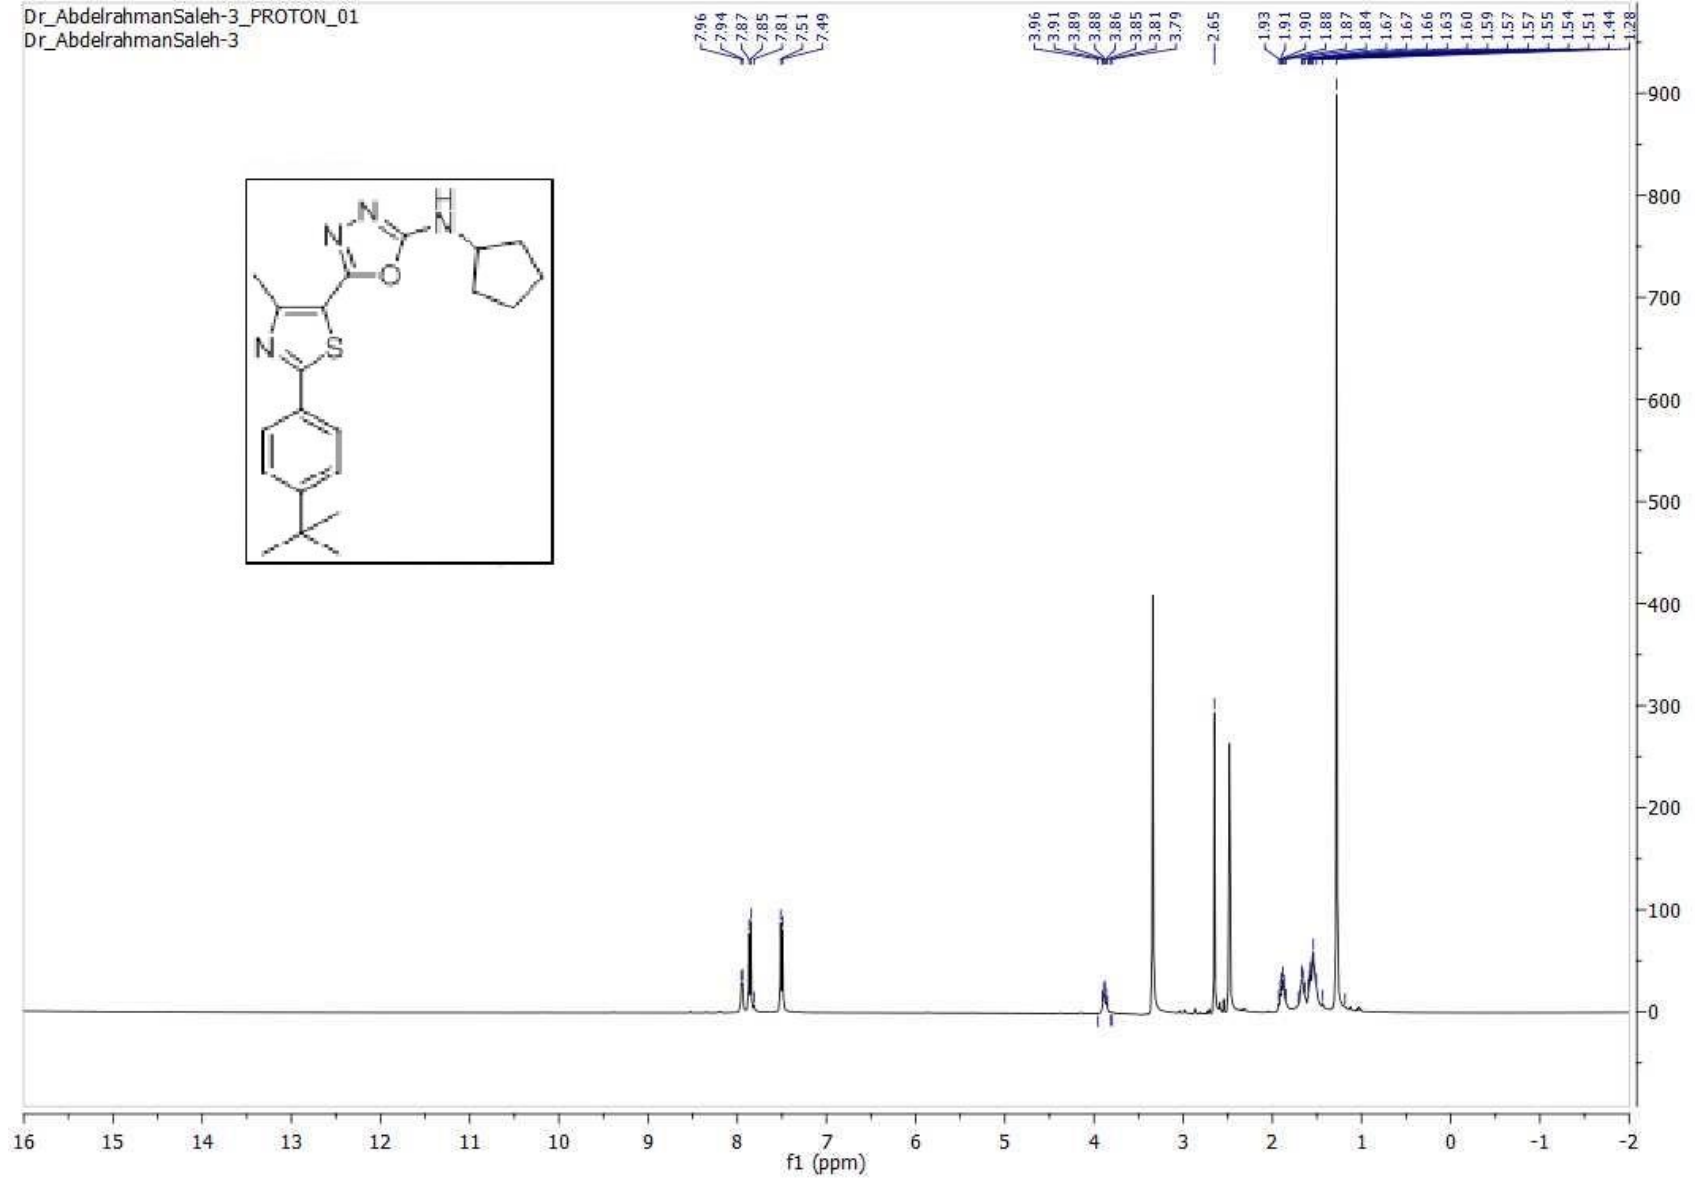

Dr\_AbdelrahmanSaleh-3\_CARBON\_01  
Dr\_AbdelrahmanSaleh-3

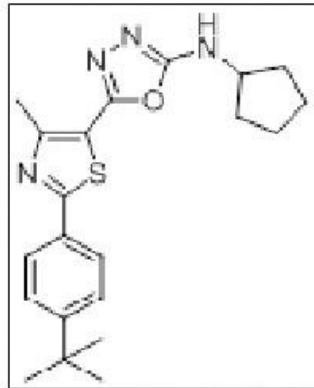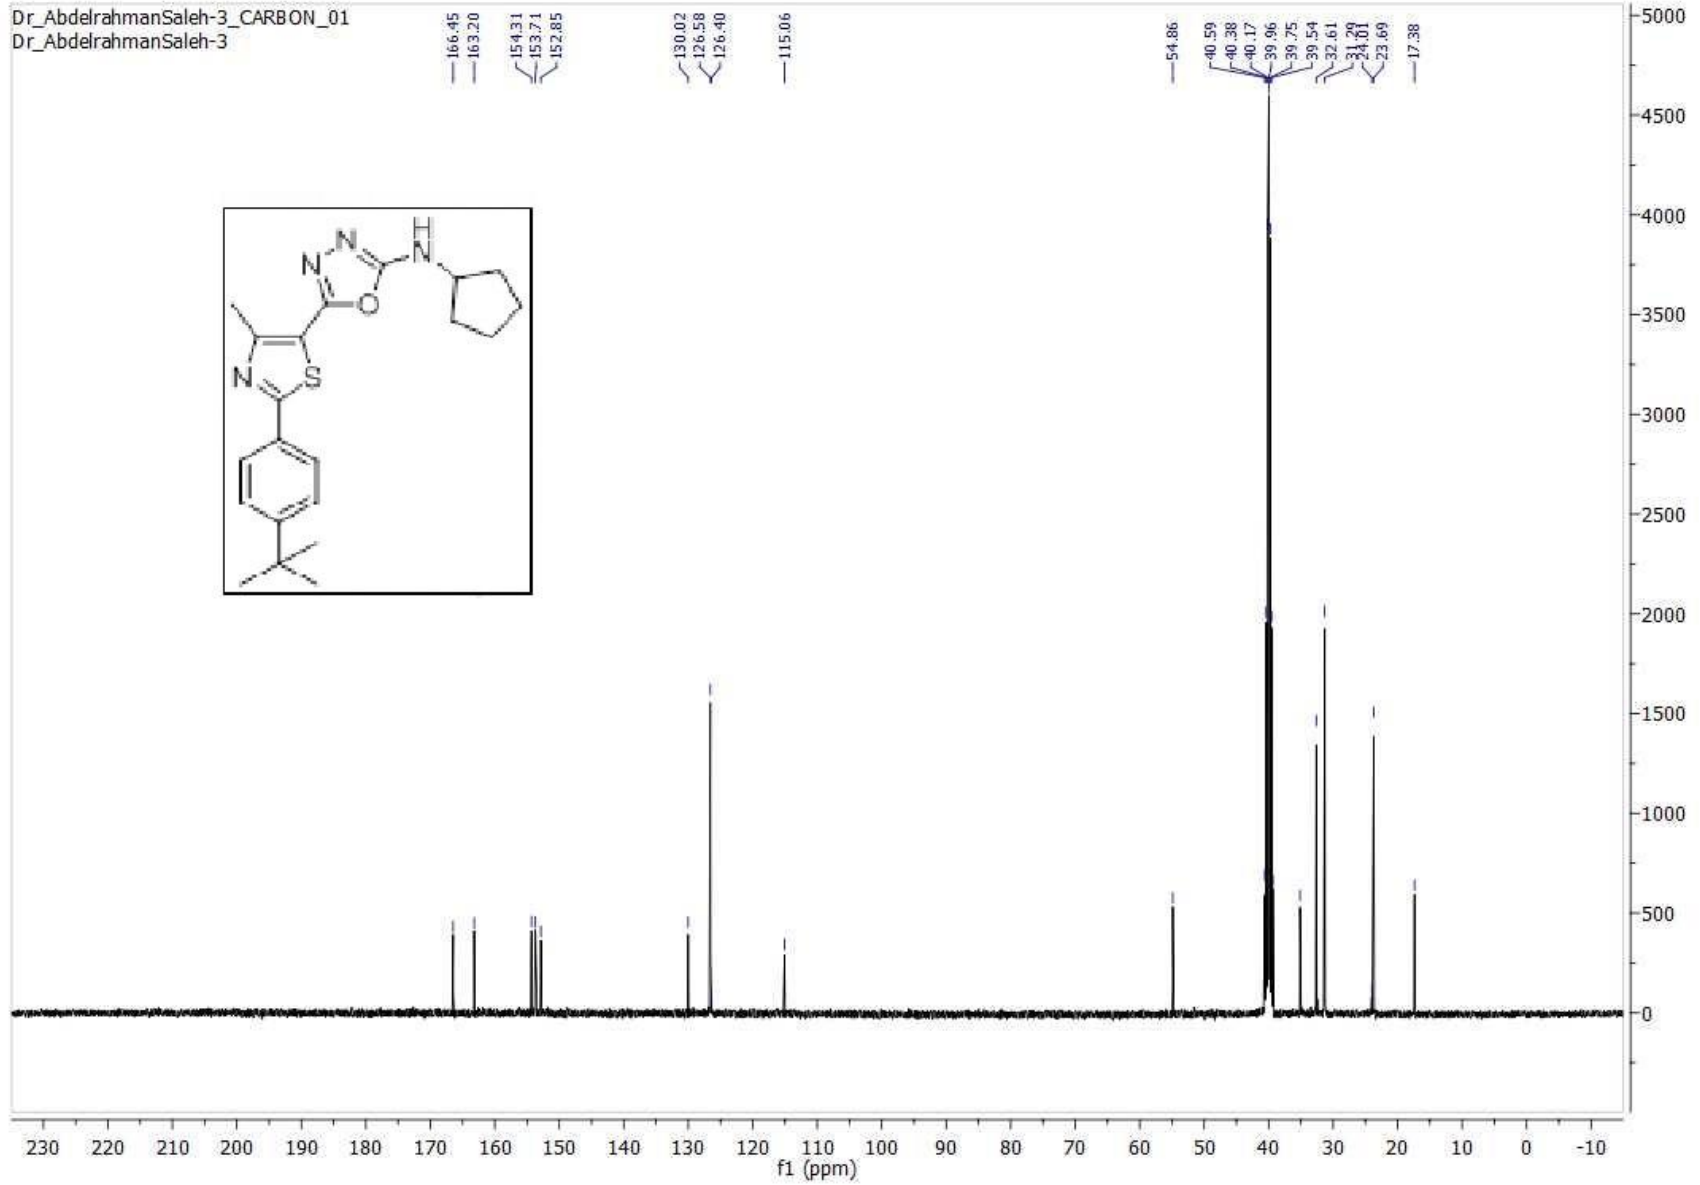



Dr\_AbdelrahmanSaleh-2\_PROTON\_01  
Dr\_AbdelrahmanSaleh-2

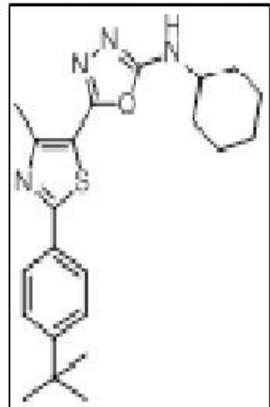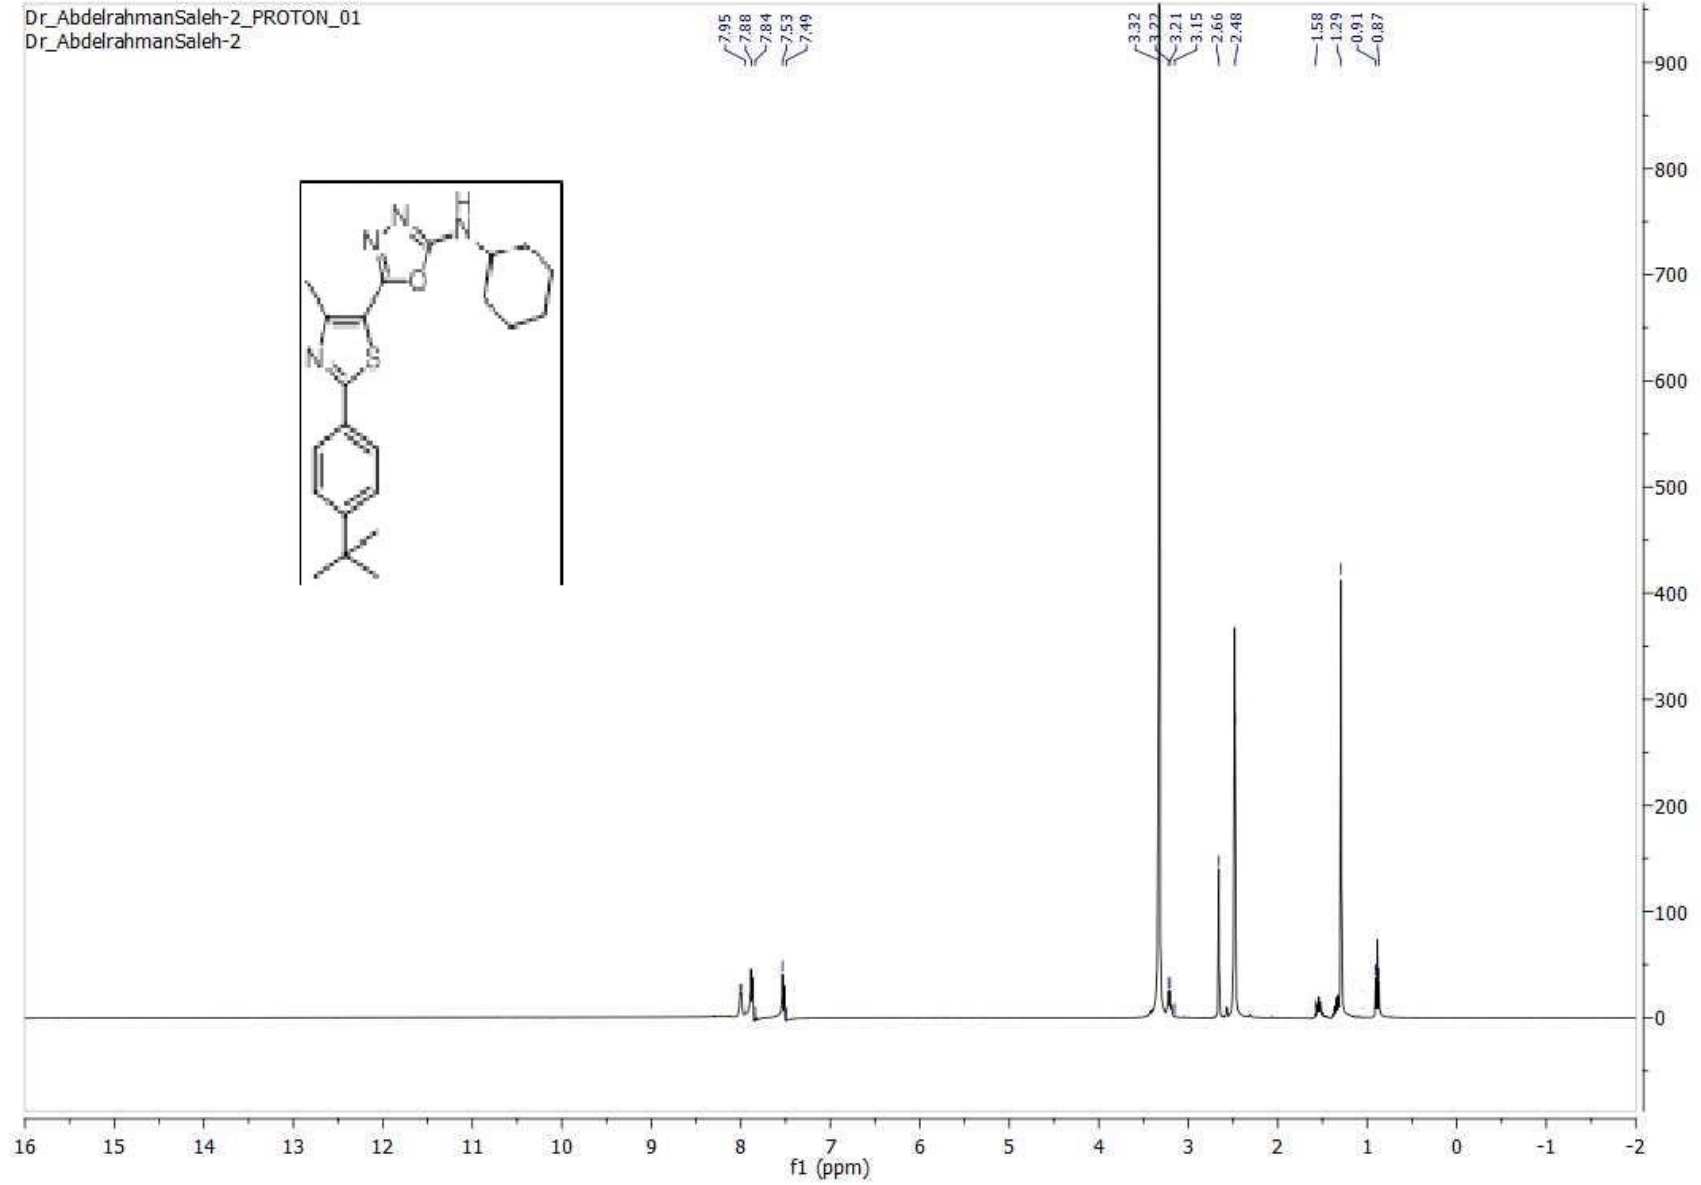

Dr\_AbdelrahmanSaleh-2\_CARBON\_01  
Dr\_AbdelrahmanSaleh-2

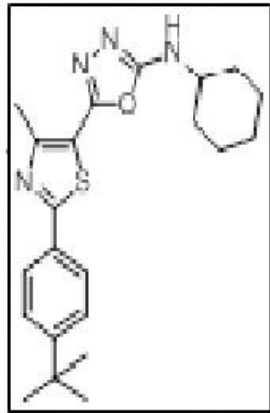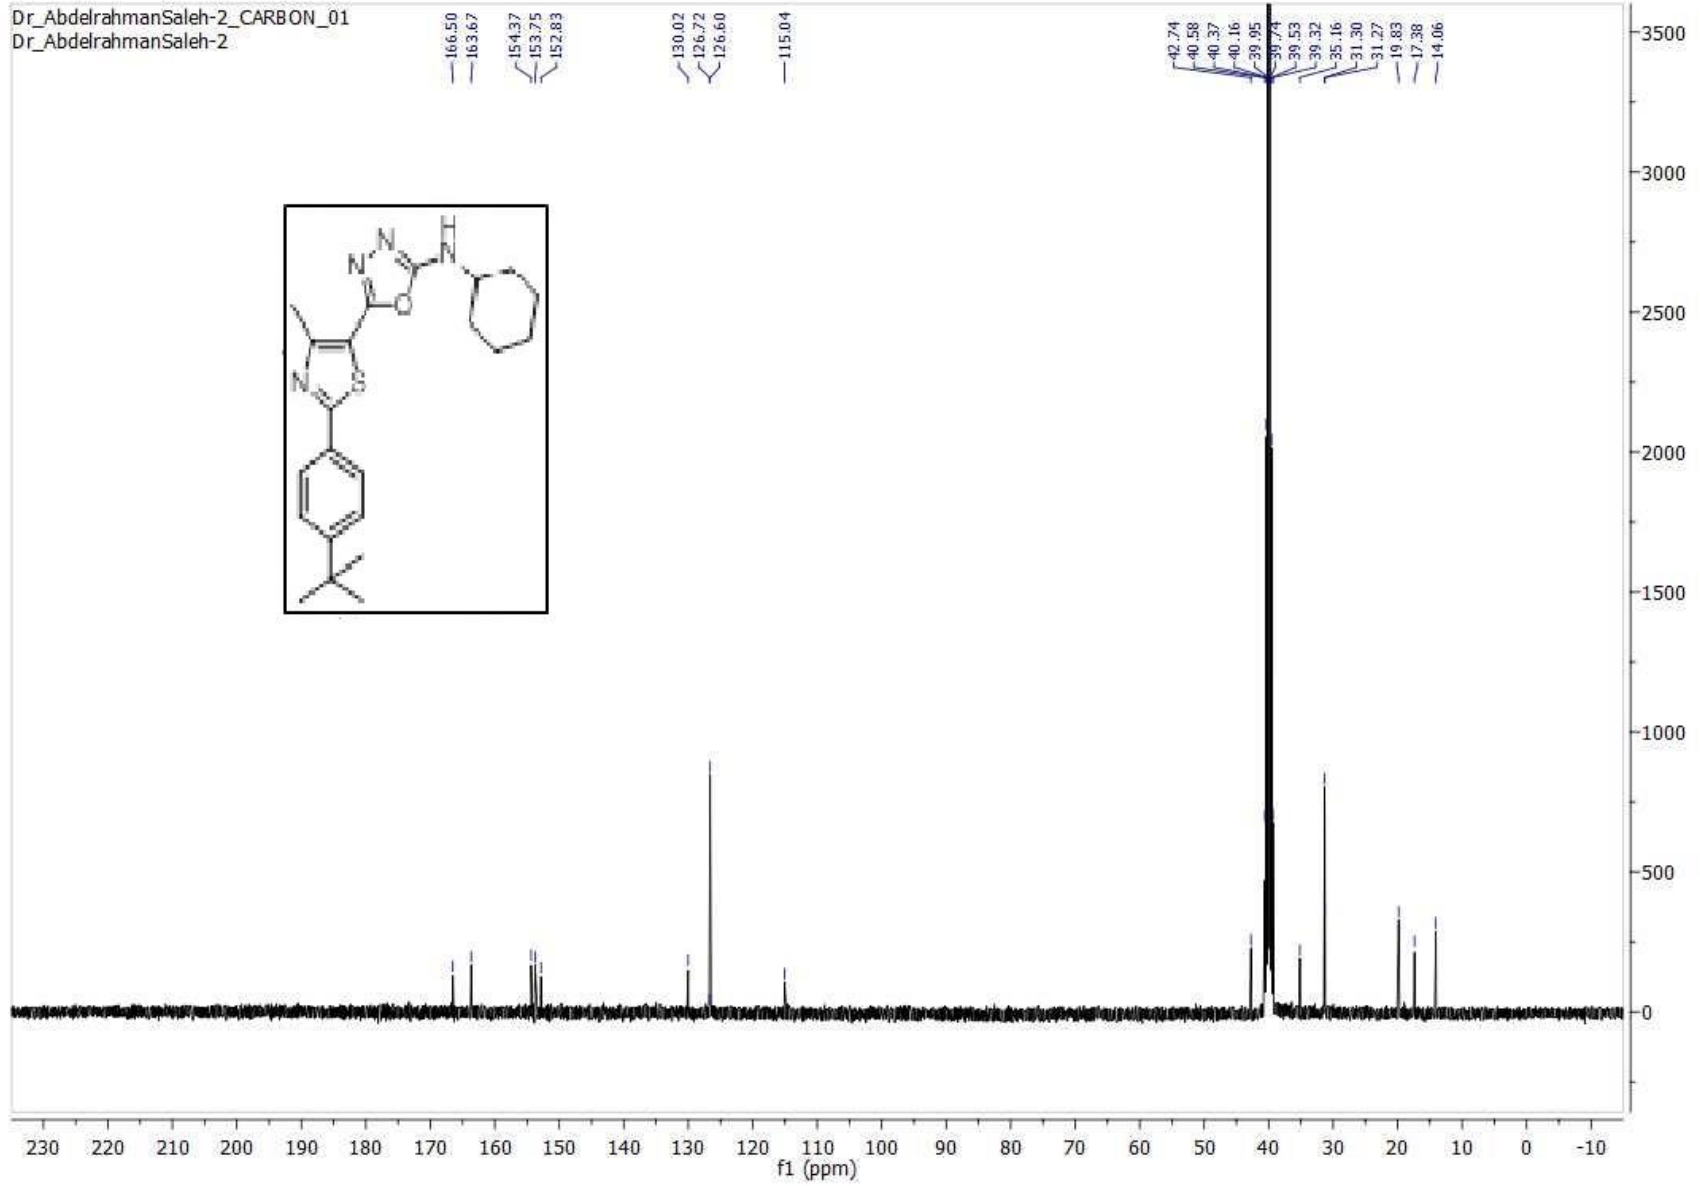

Dr\_AbdelrahmanSaleh-4\_PROTON\_01  
Dr\_AbdelrahmanSaleh-4

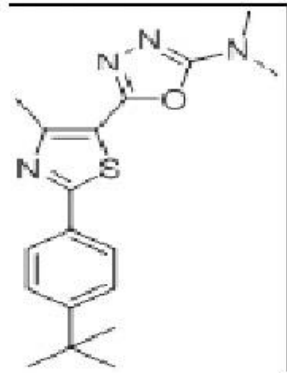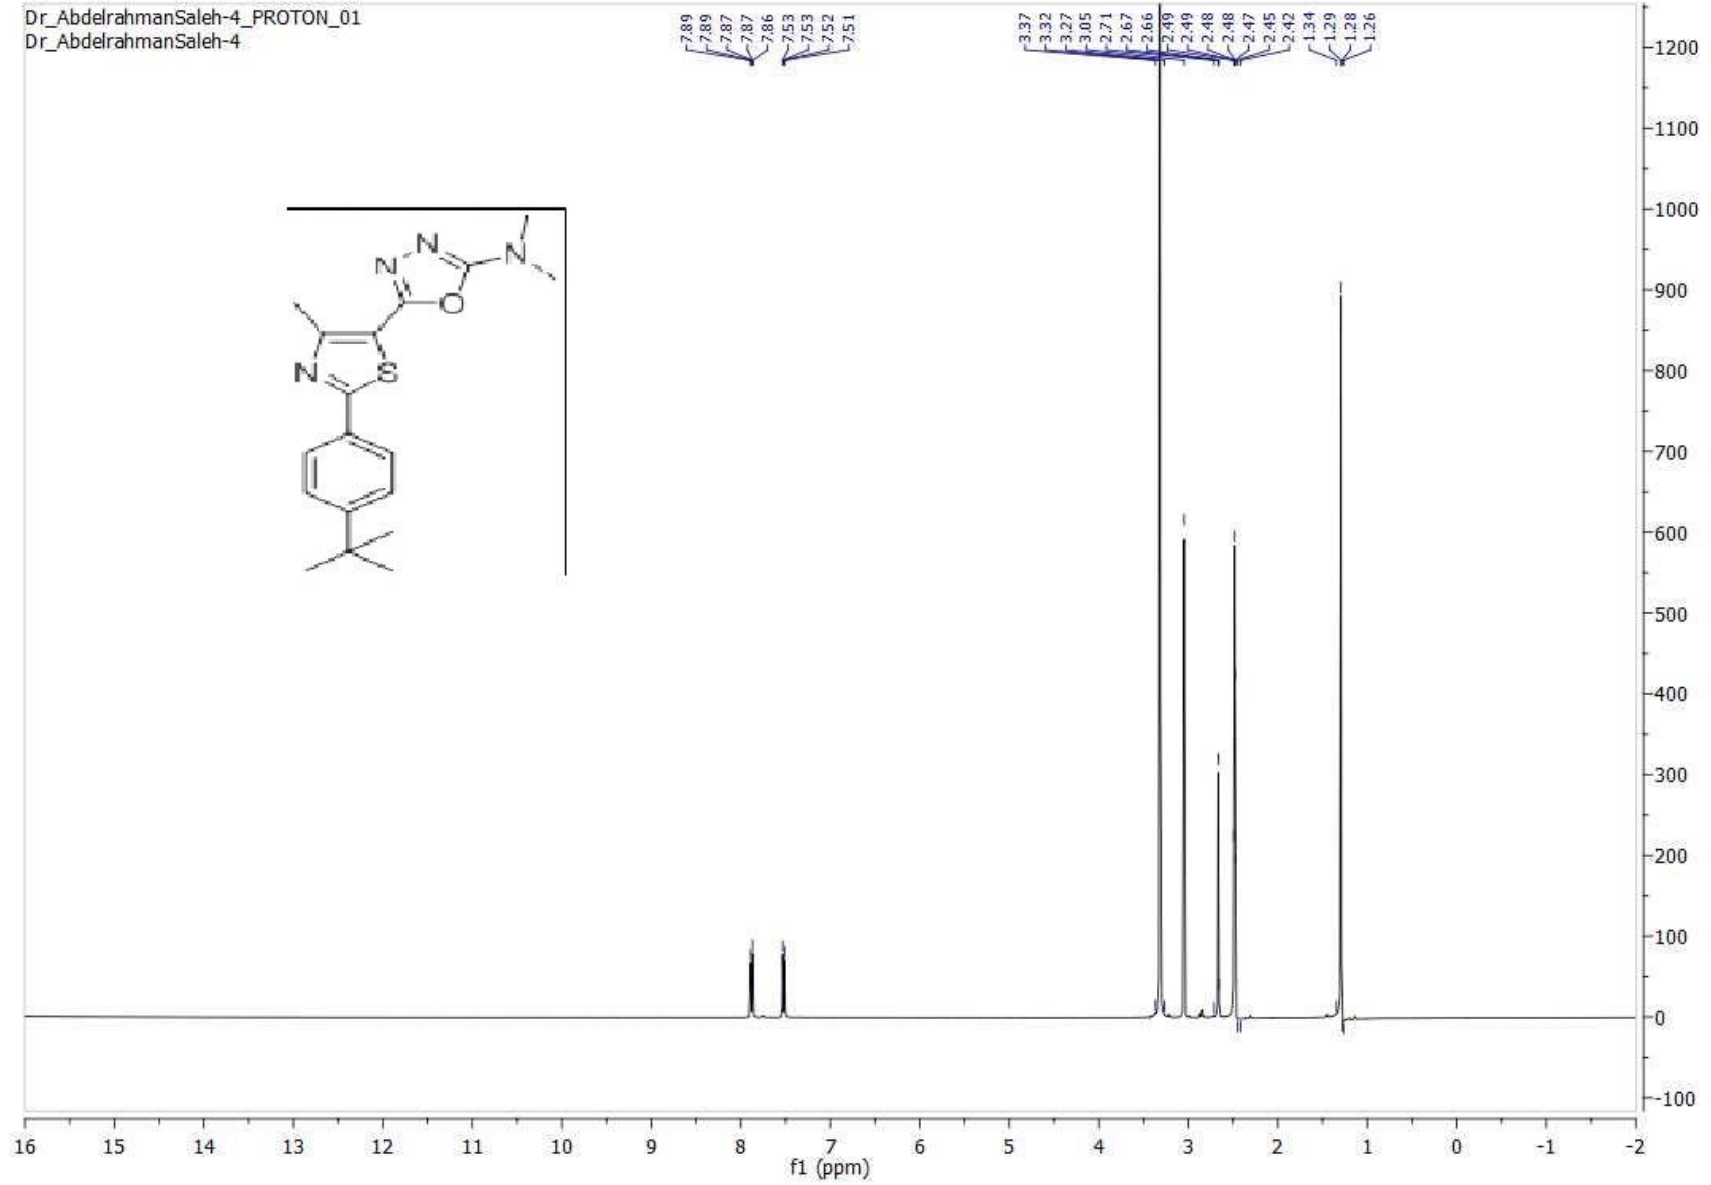

Dr\_AbdelrahmanSaleh-4\_CARBON\_01  
Dr\_AbdelrahmanSaleh-4

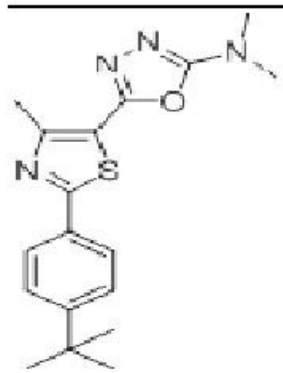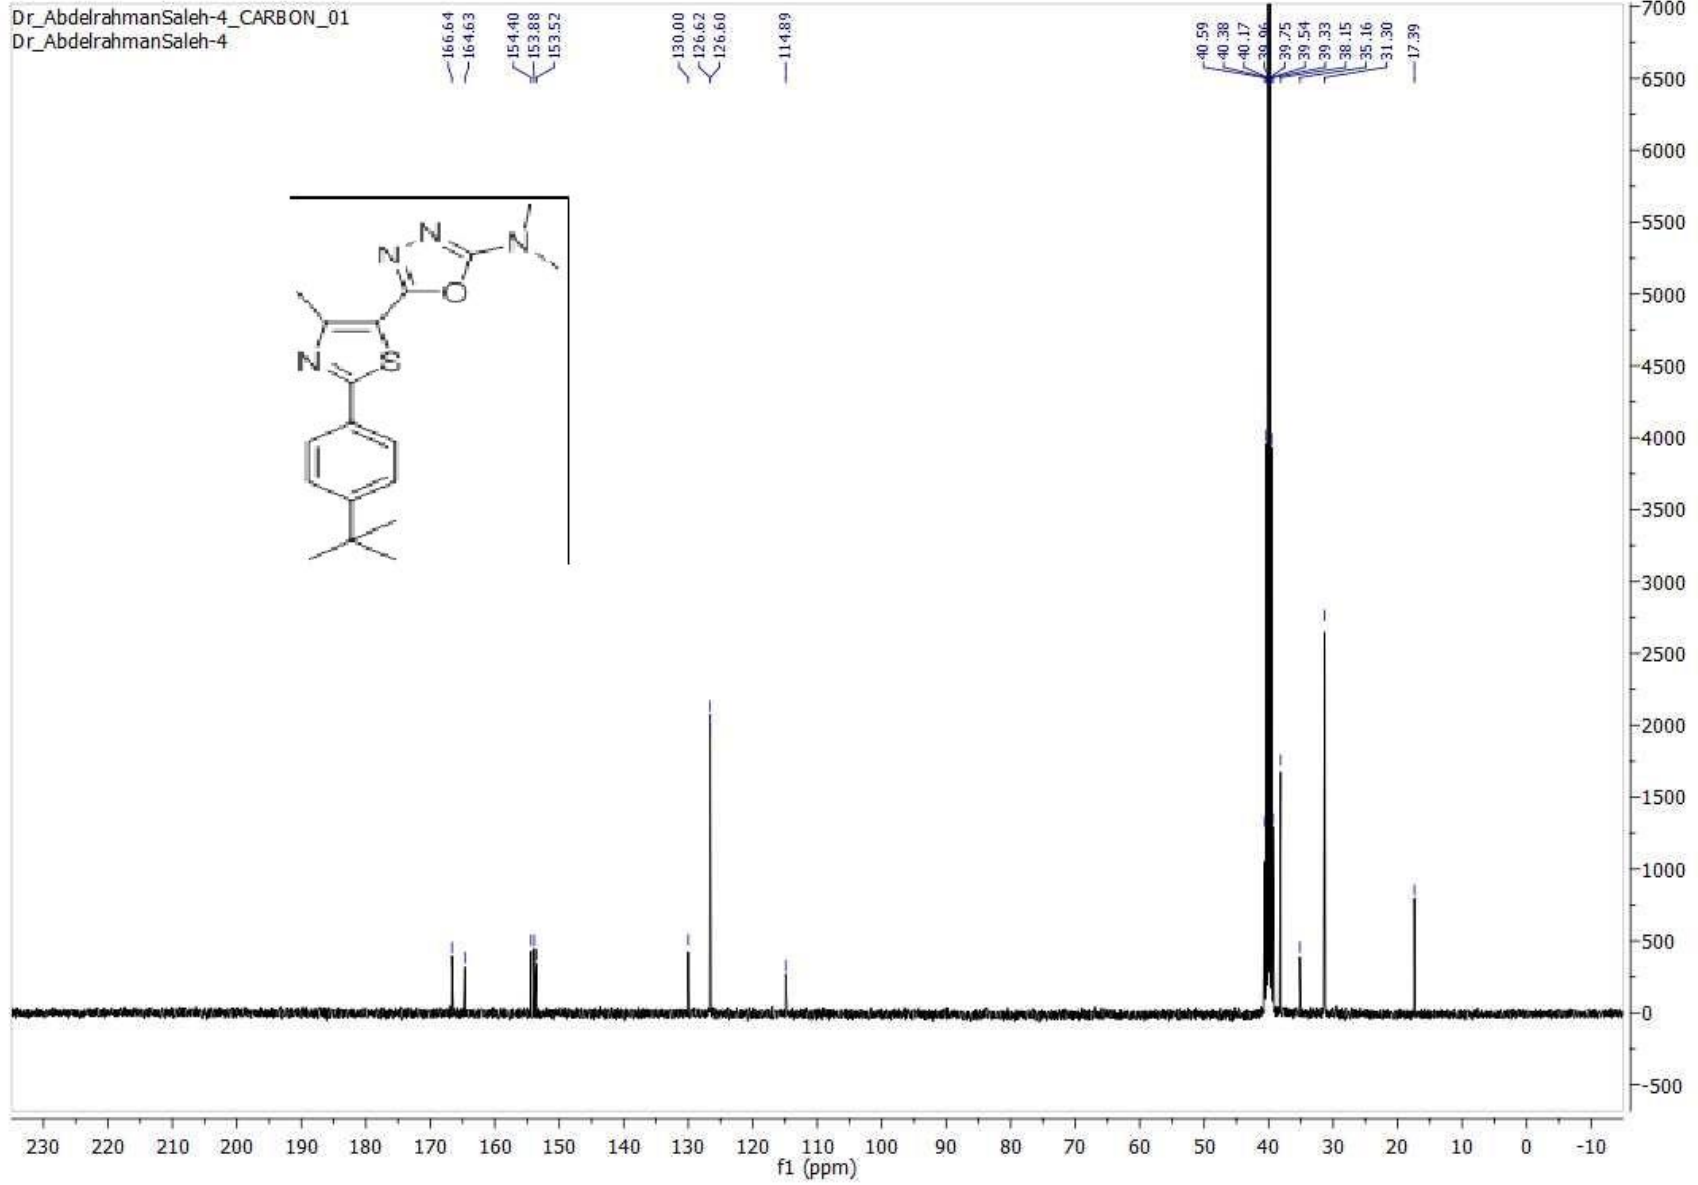

Dr\_AbdElrhaman Salha-6\_PROTON\_01  
Dr\_AbdElrhaman Salha-6

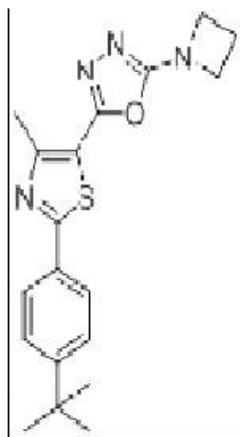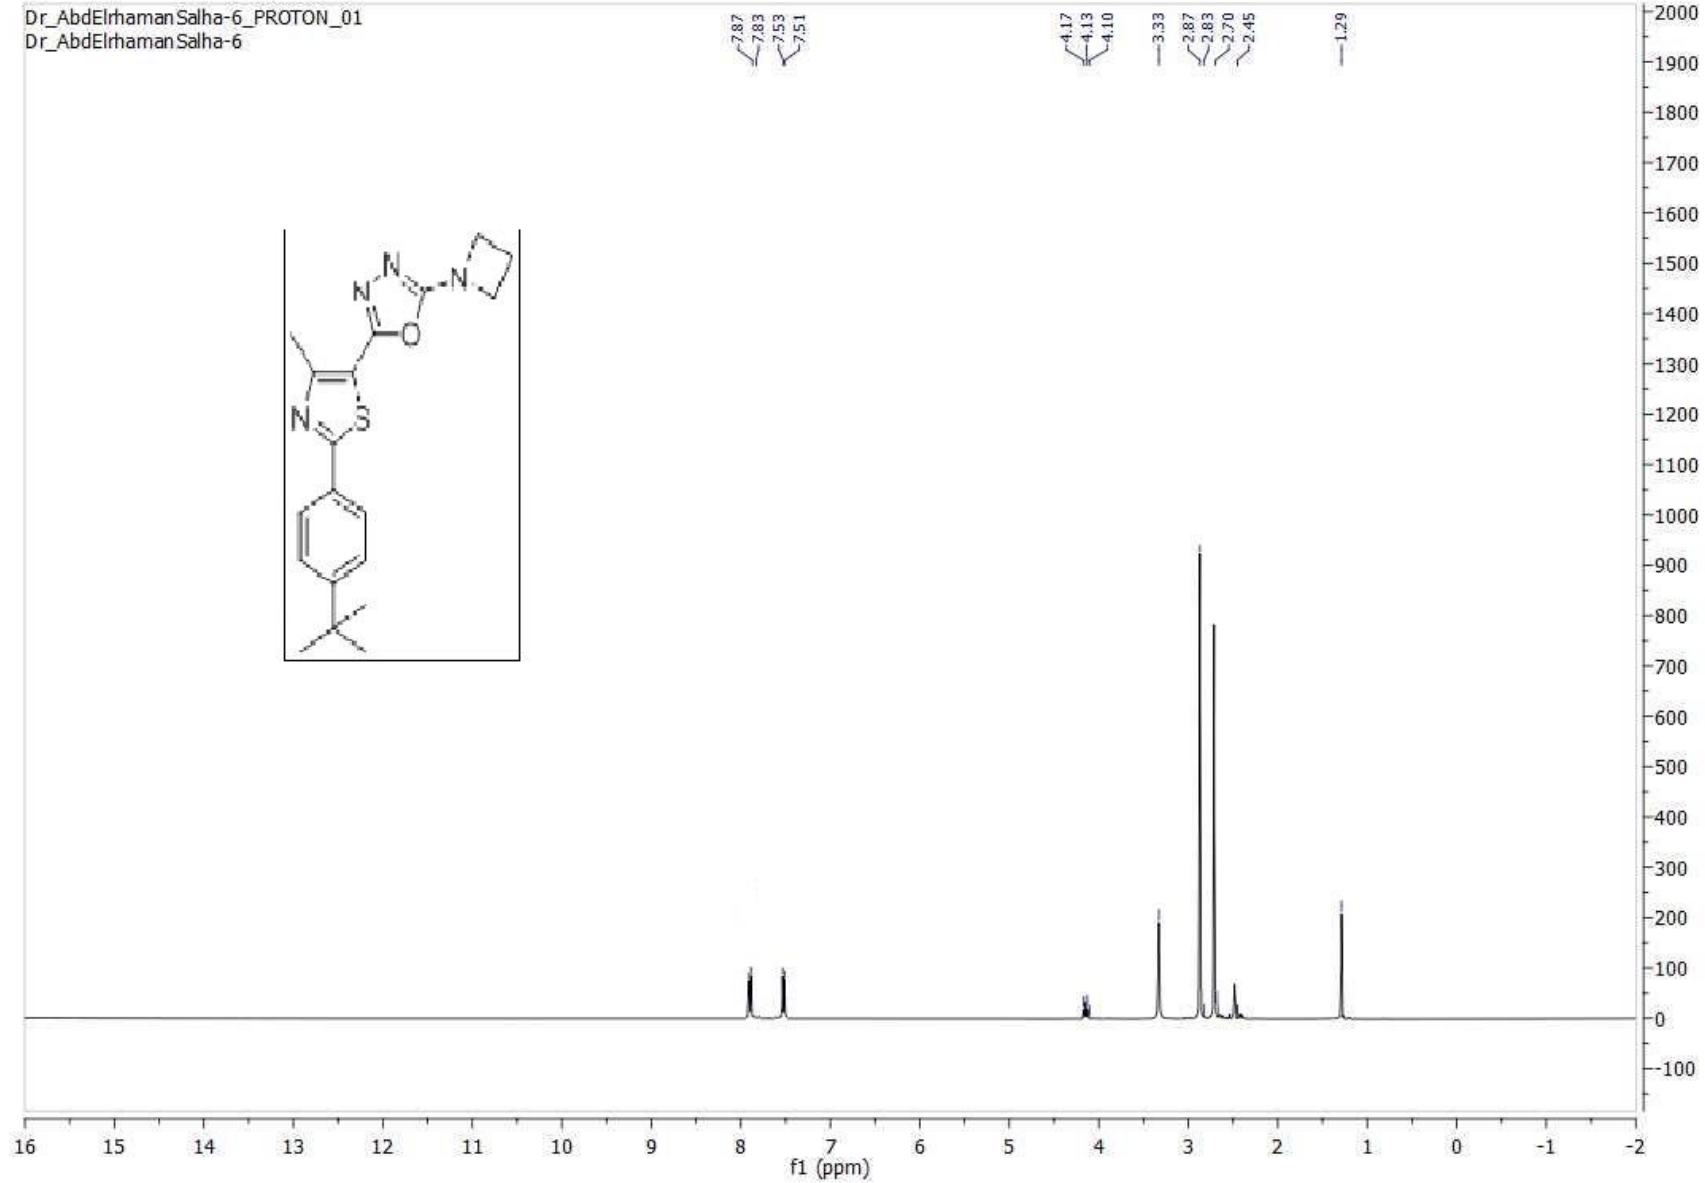

Dr\_AbdElrhman Salha-6\_CARBON\_01  
Dr\_AbdElrhman Salha-6

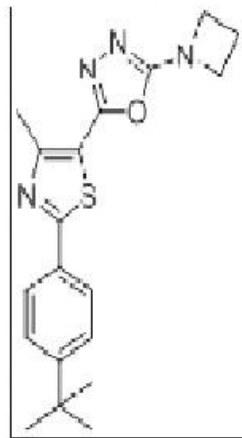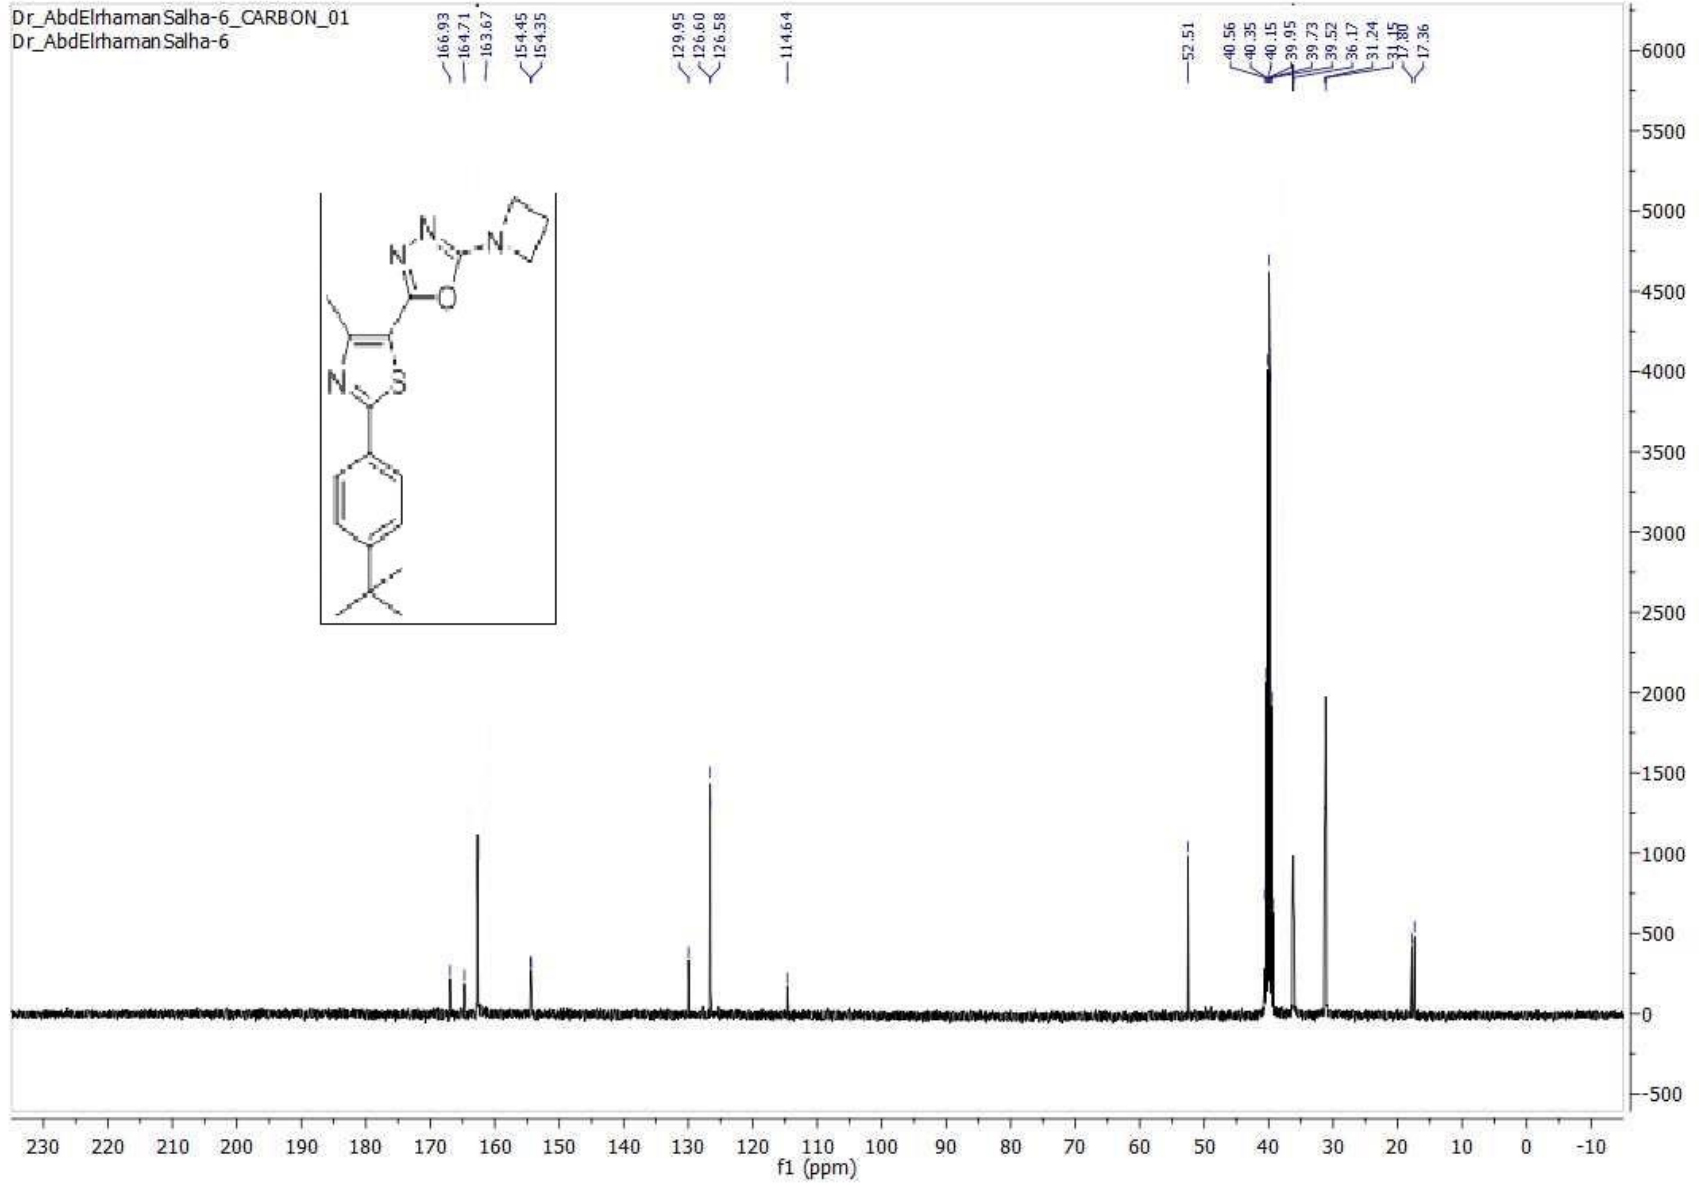

Dr\_AbdelrahmanSaleh-8\_PROTON\_01  
Dr\_AbdelrahmanSaleh-8

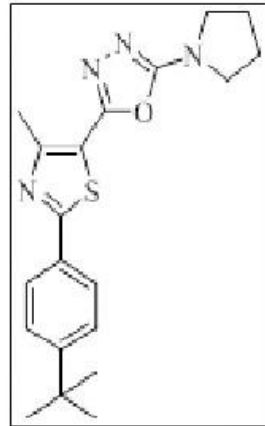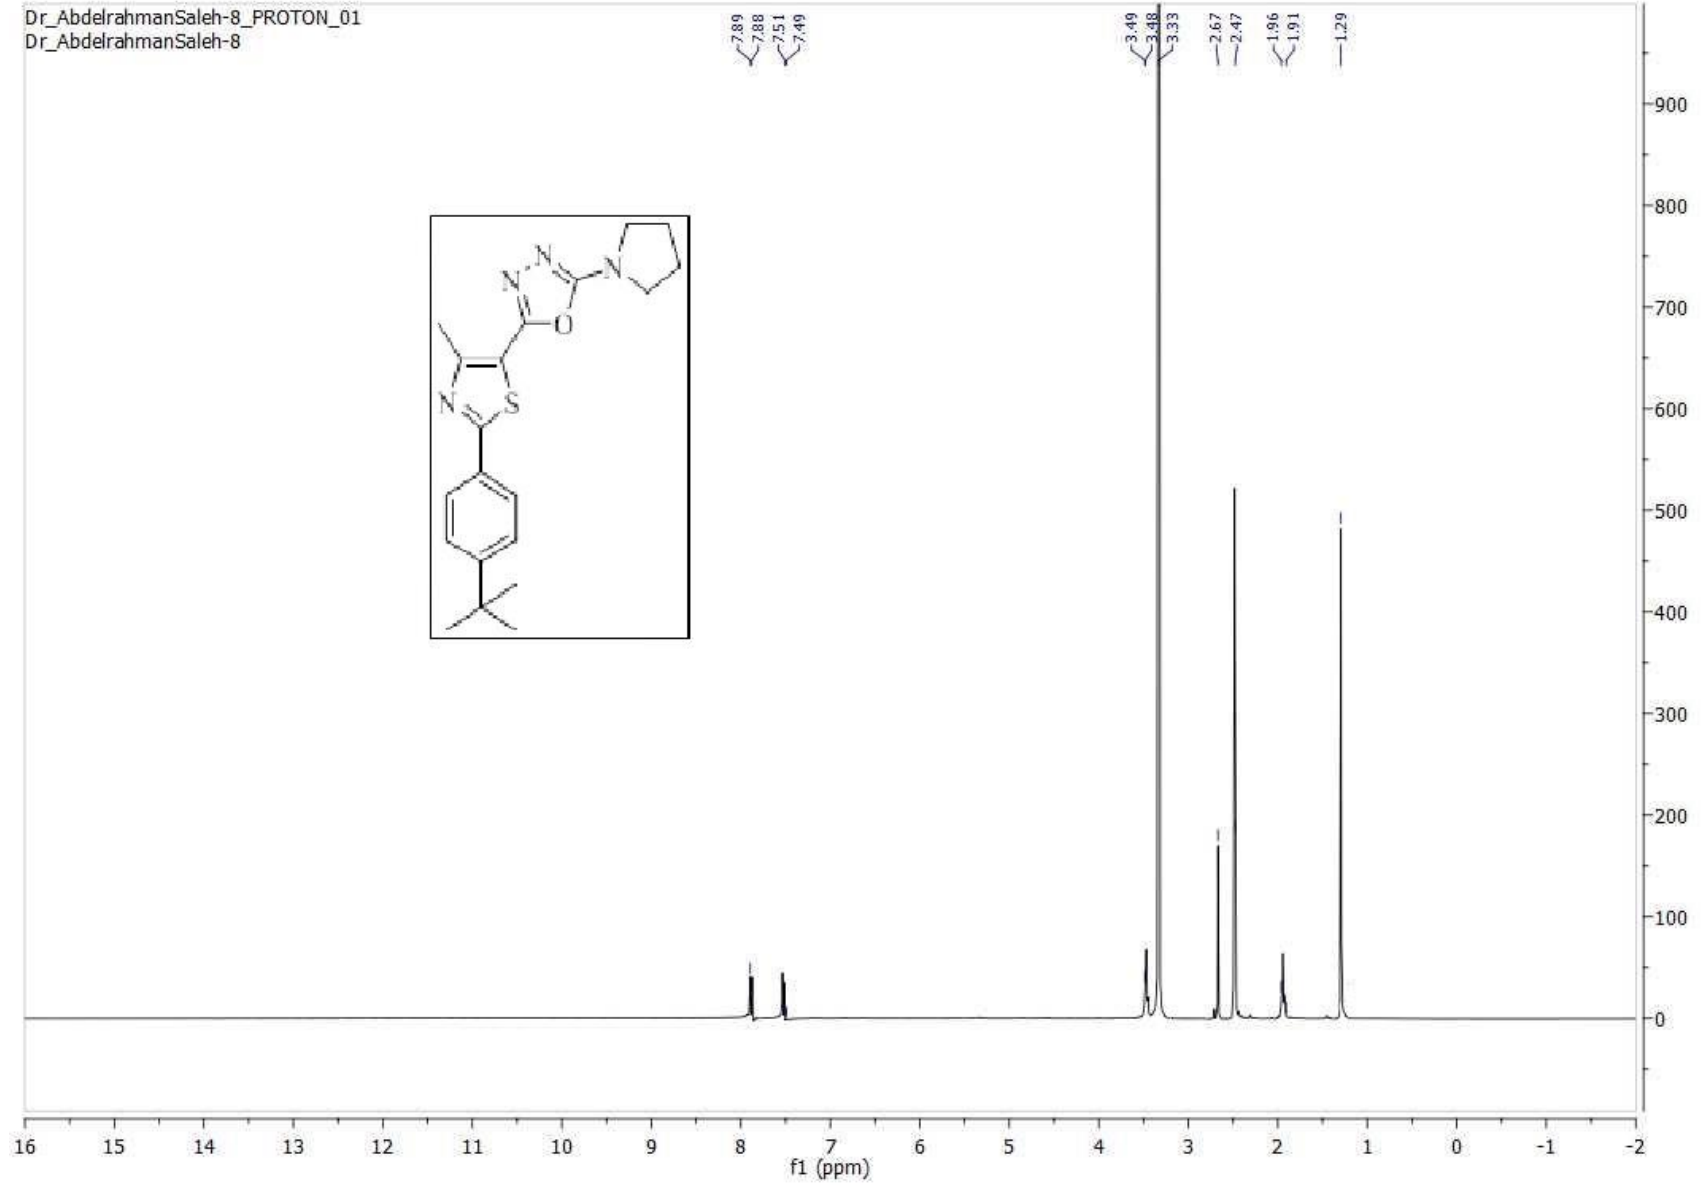

Dr\_AbdelrahmanSaleh-8\_CARBON\_01  
Dr\_AbdelrahmanSaleh-8

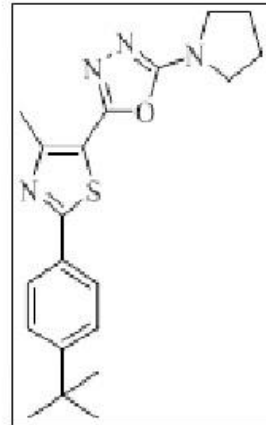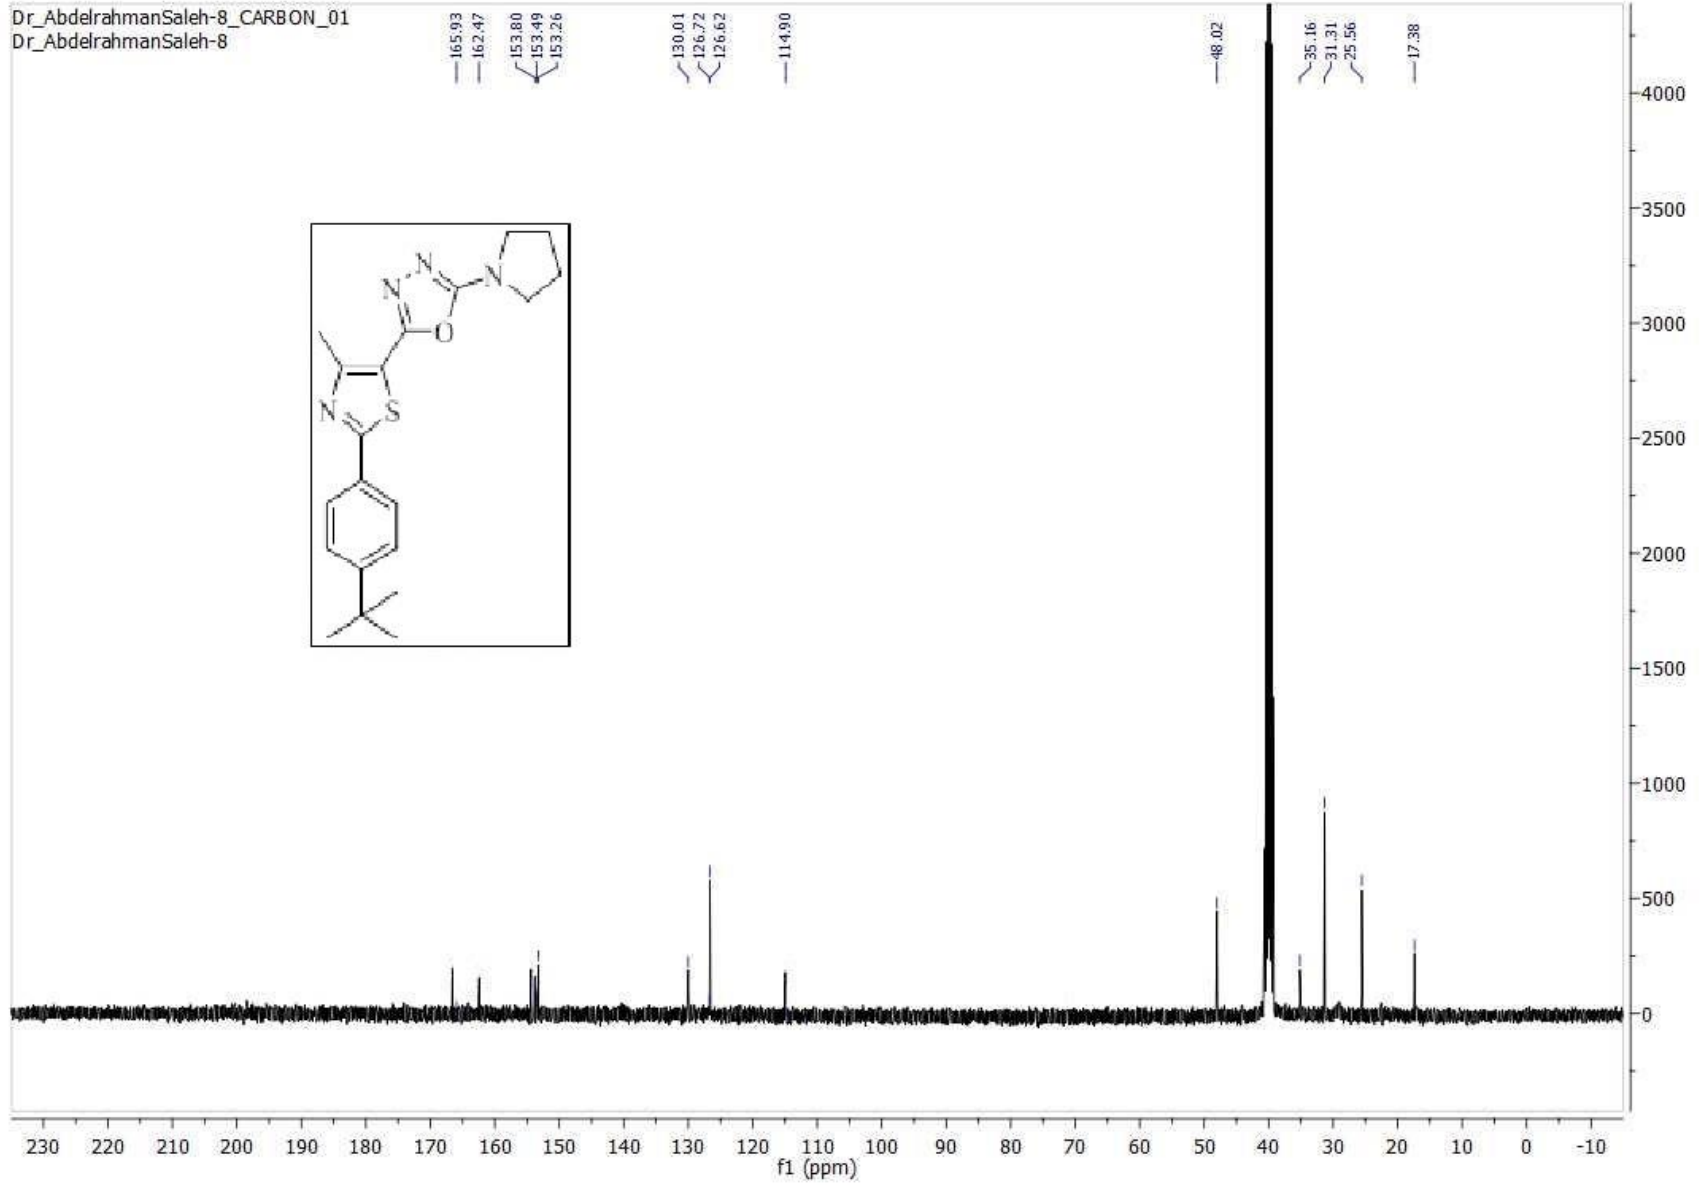



Dr\_AbdelrahmanSaleh-10\_PROTON\_01  
Dr\_AbdelrahmanSaleh-10

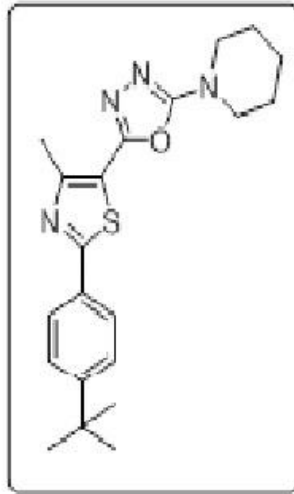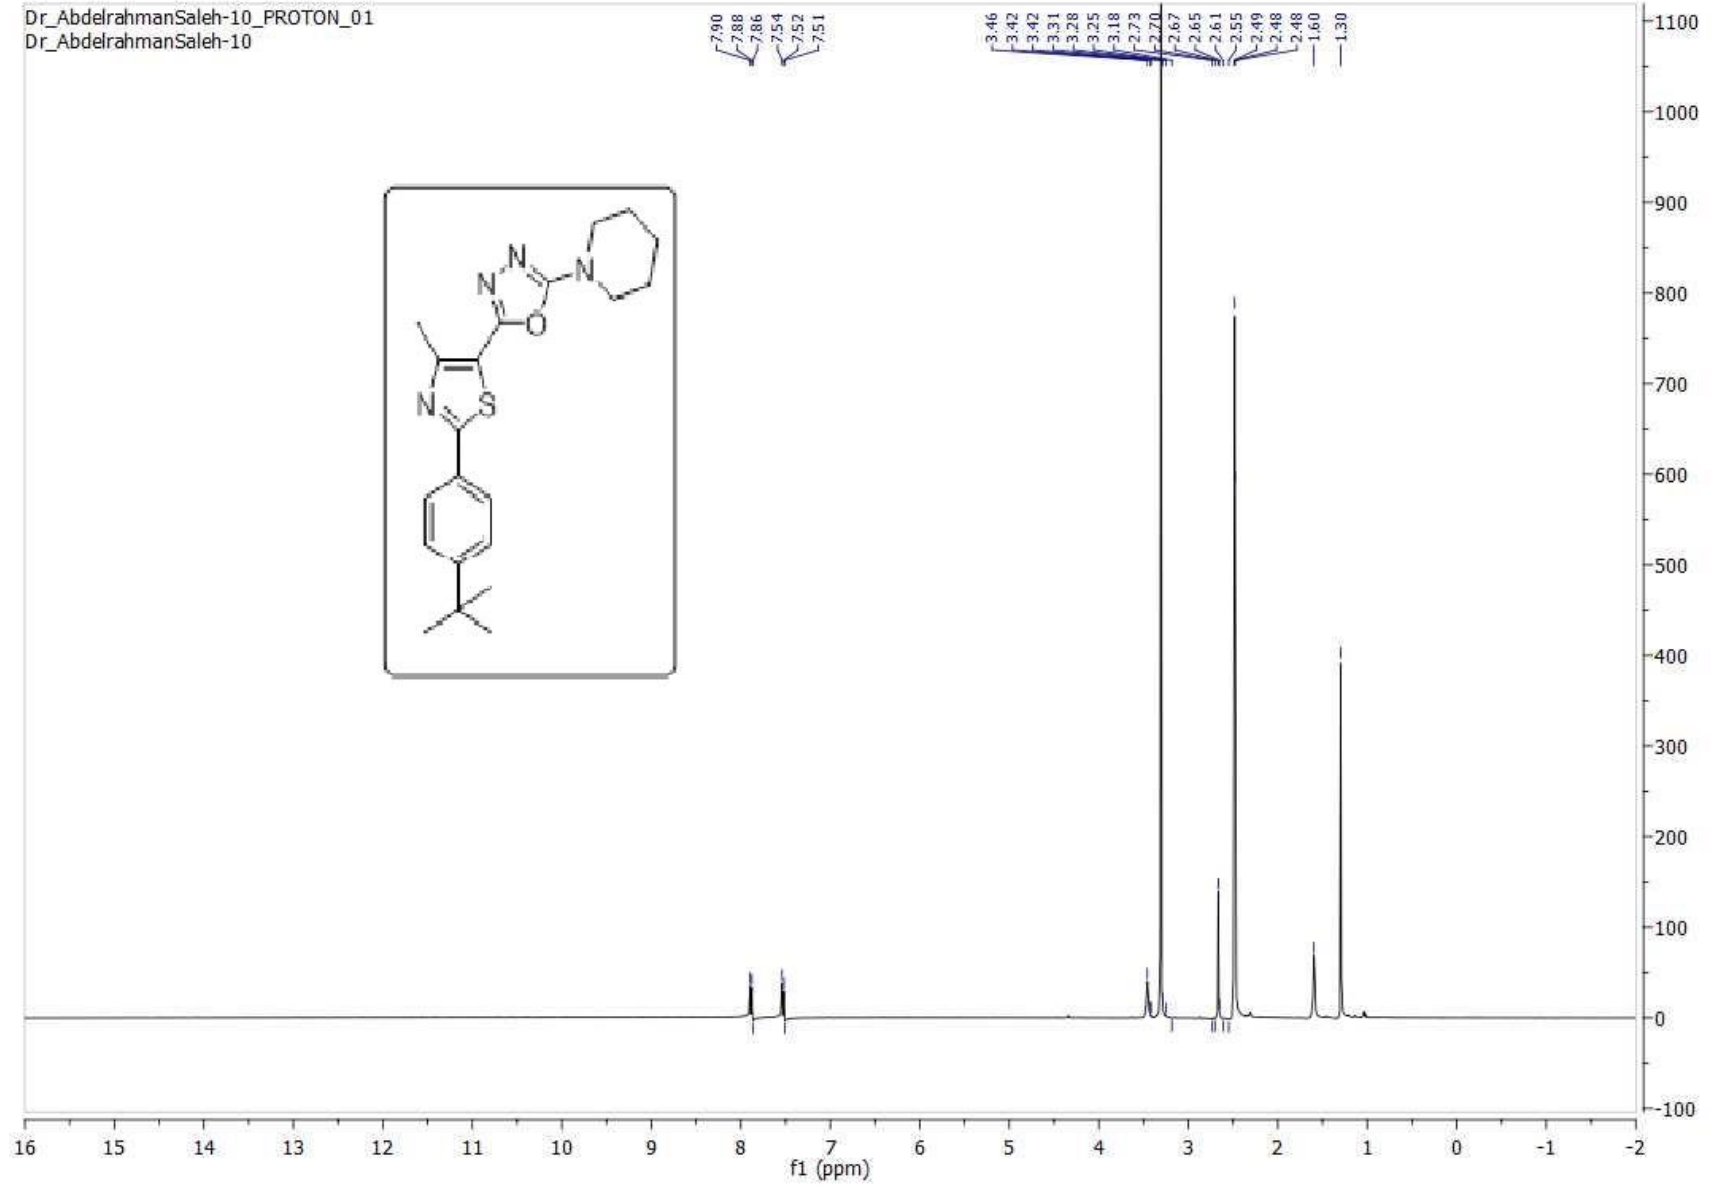

Dr\_AbdelrahmanSaleh-10\_CARBON\_01  
Dr\_AbdelrahmanSaleh-10

166.73  
164.03

154.43  
154.04  
153.50

129.99  
126.63  
126.61

114.88

47.10

35.17  
31.31

24.84  
23.61  
17.45

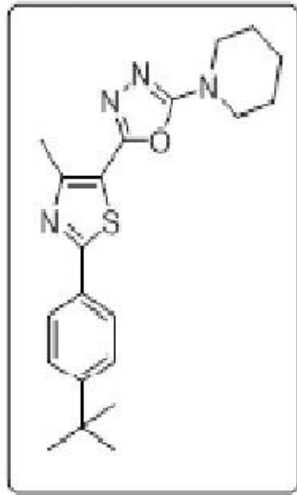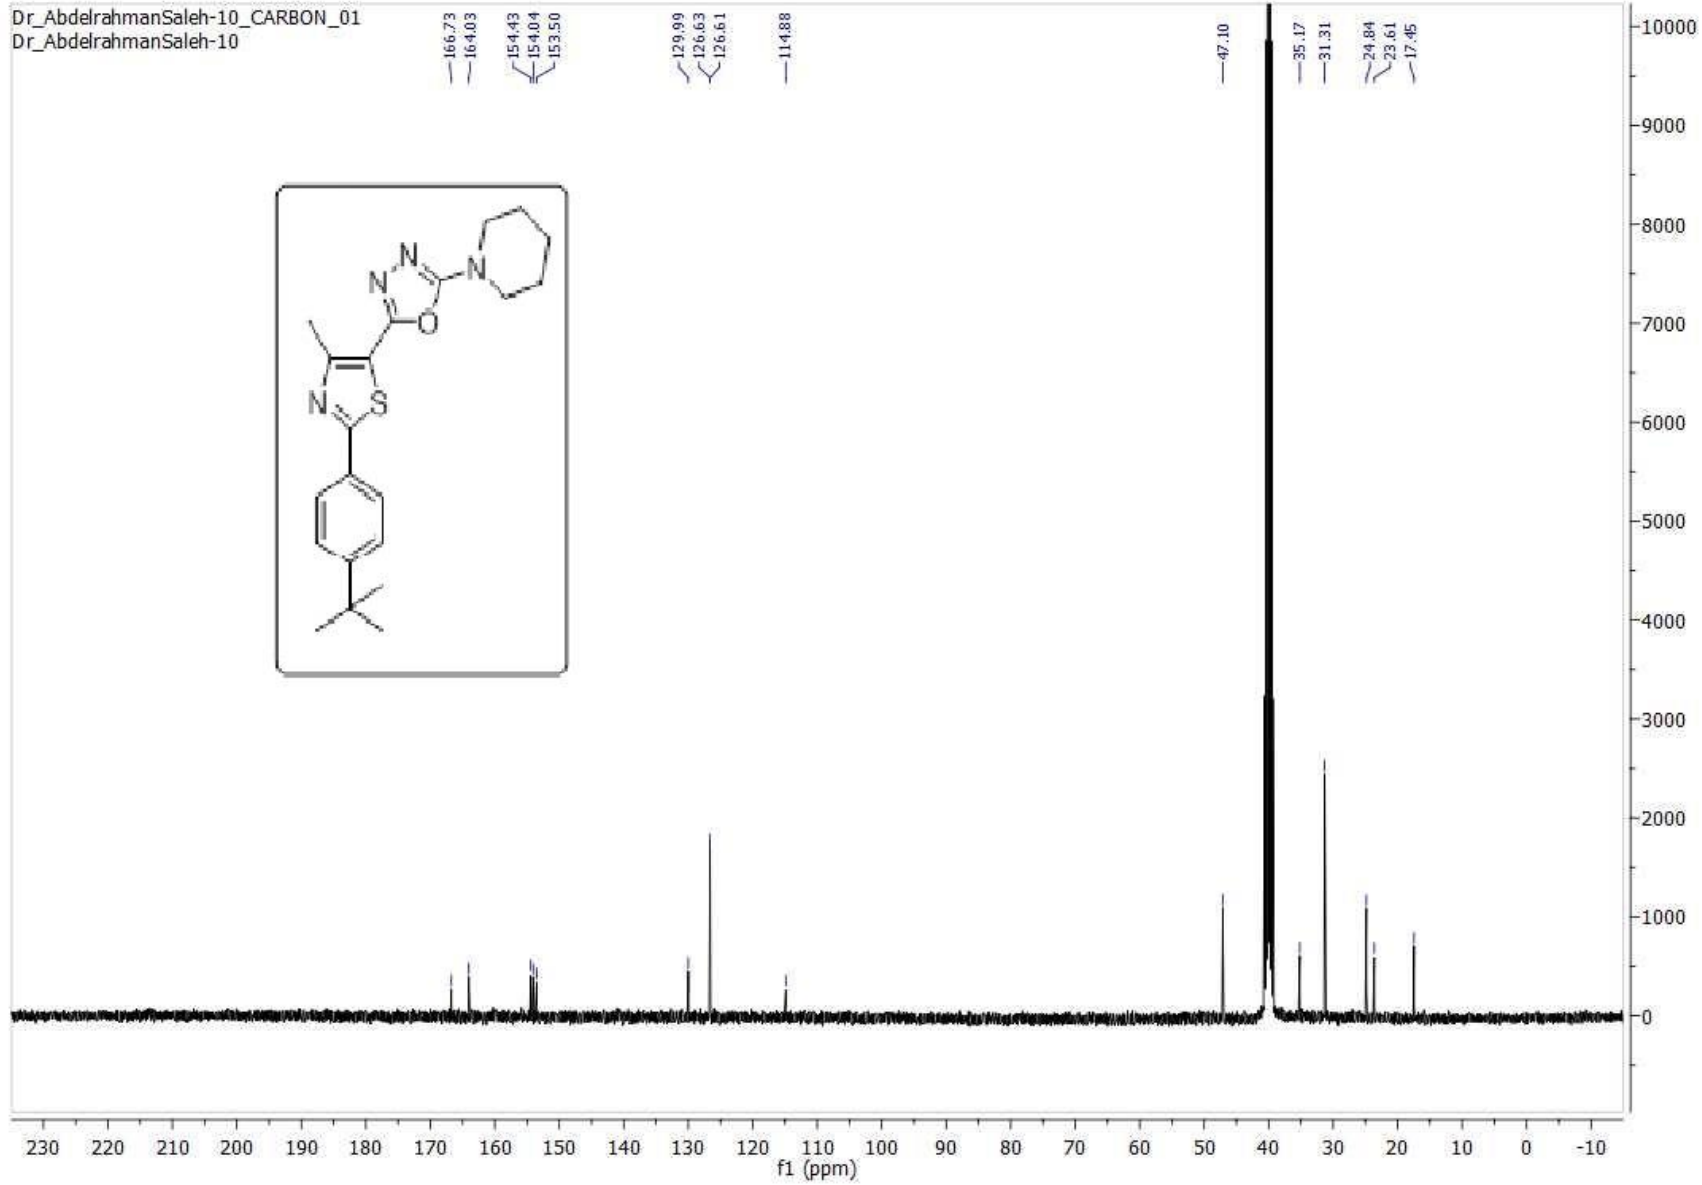

Mohamed Moustafa\_H\_Qt27  
Mohamed Moustafa\_H\_Qt27

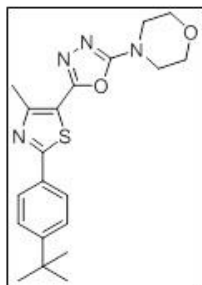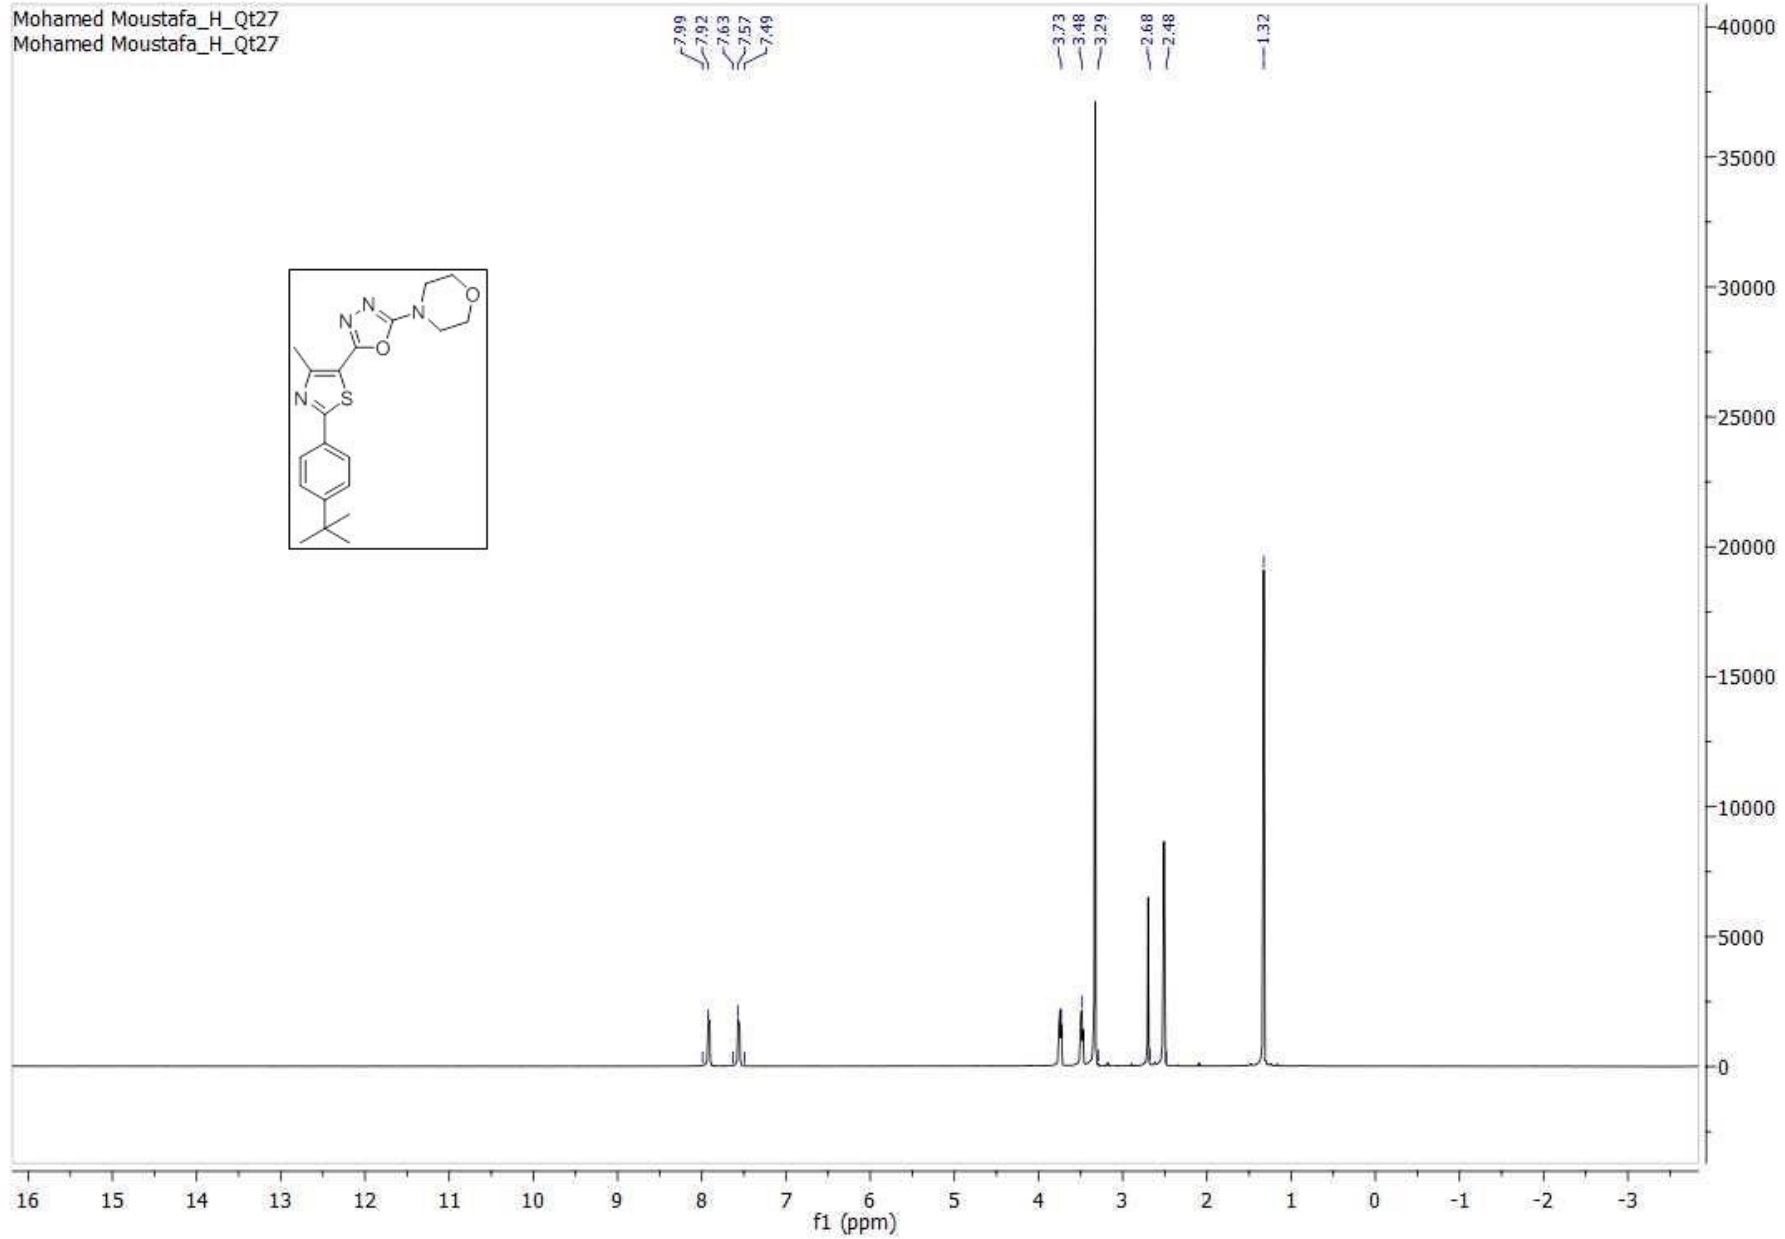

Mohamed Moustafa\_C\_Qt27  
Mohamed Moustafa\_C\_Qt27

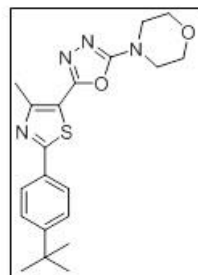

167.02  
164.01

154.53  
154.00  
153.18

130.00  
126.68  
126.31

114.73

65.61

46.29  
40.63  
40.42

40.21  
40.04

39.80  
39.59  
39.38

35.21  
31.33

17.48

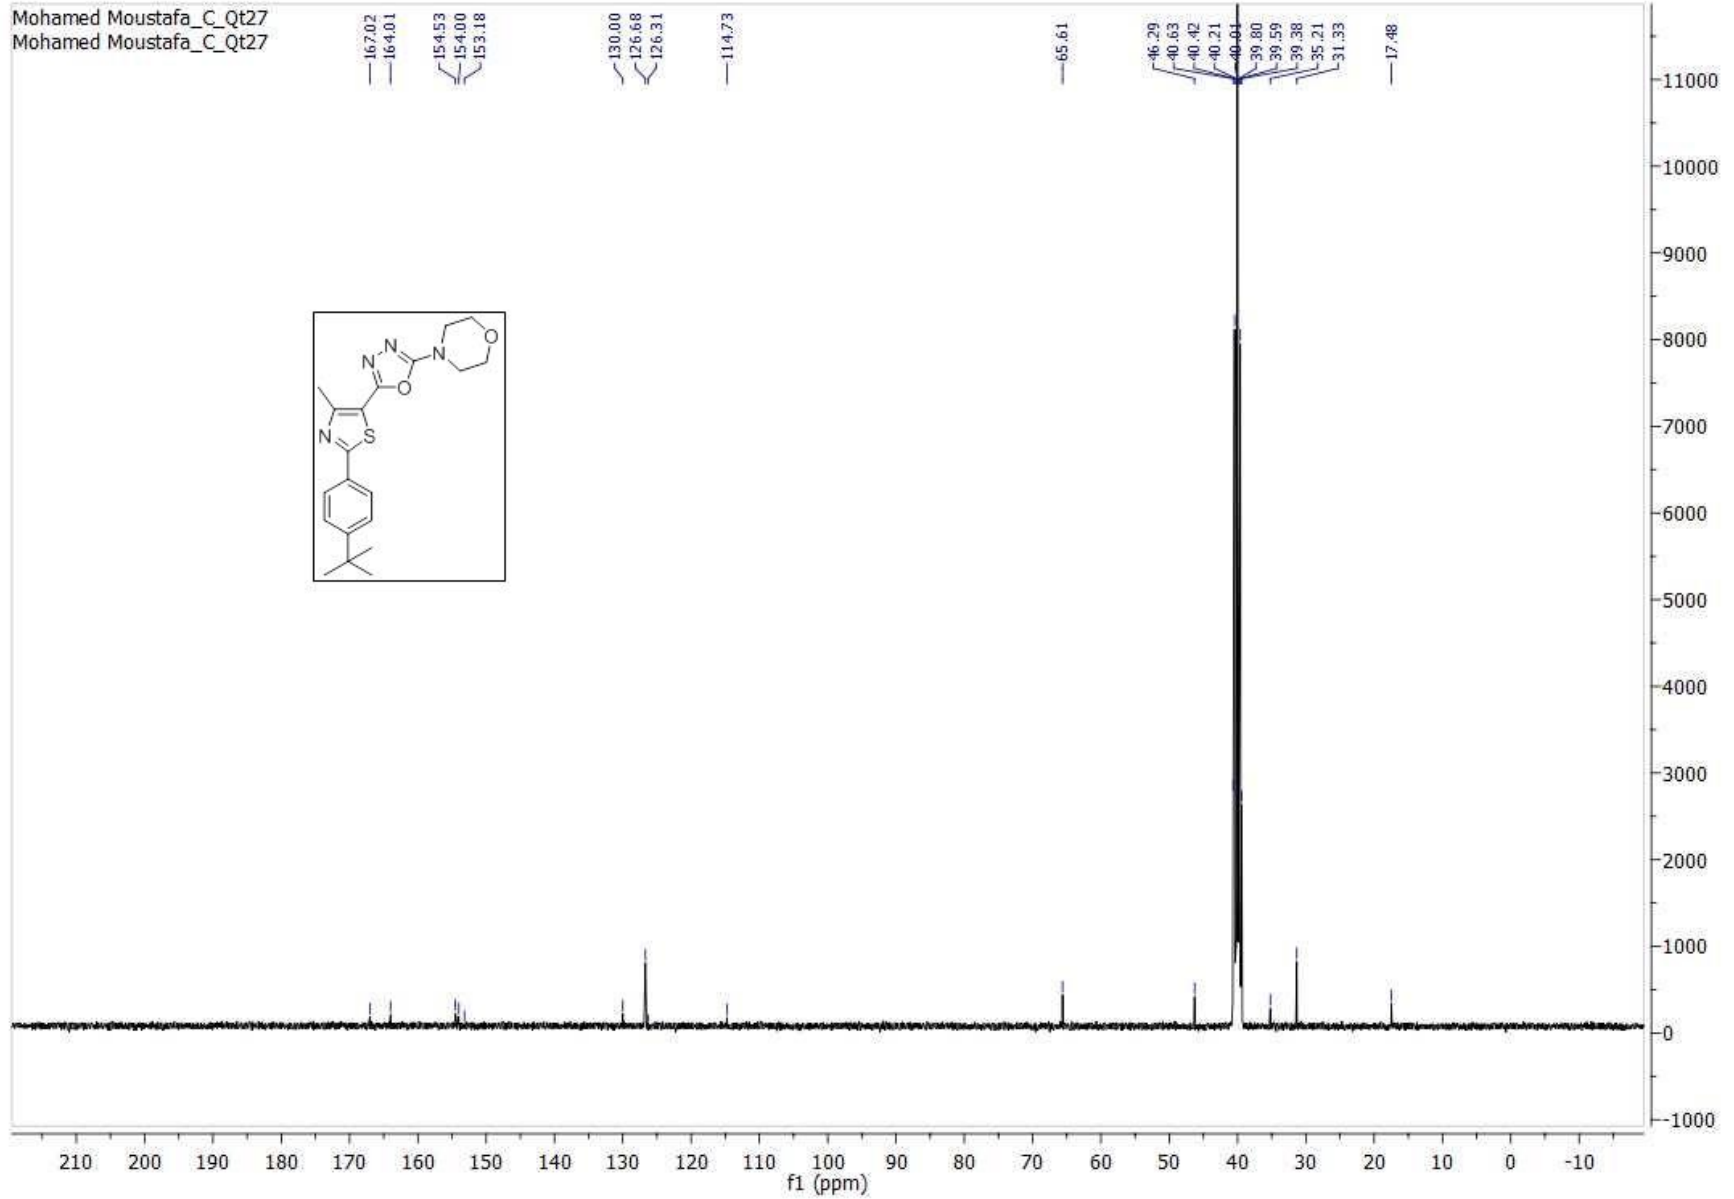

Dr\_AbdElrhaman Salha-7\_PROTON\_01  
Dr\_AbdElrhaman Salha-7

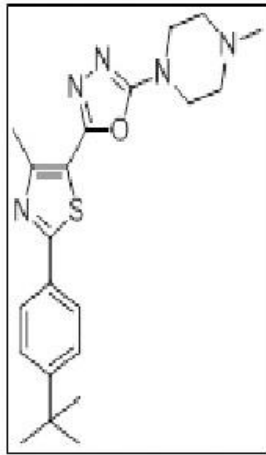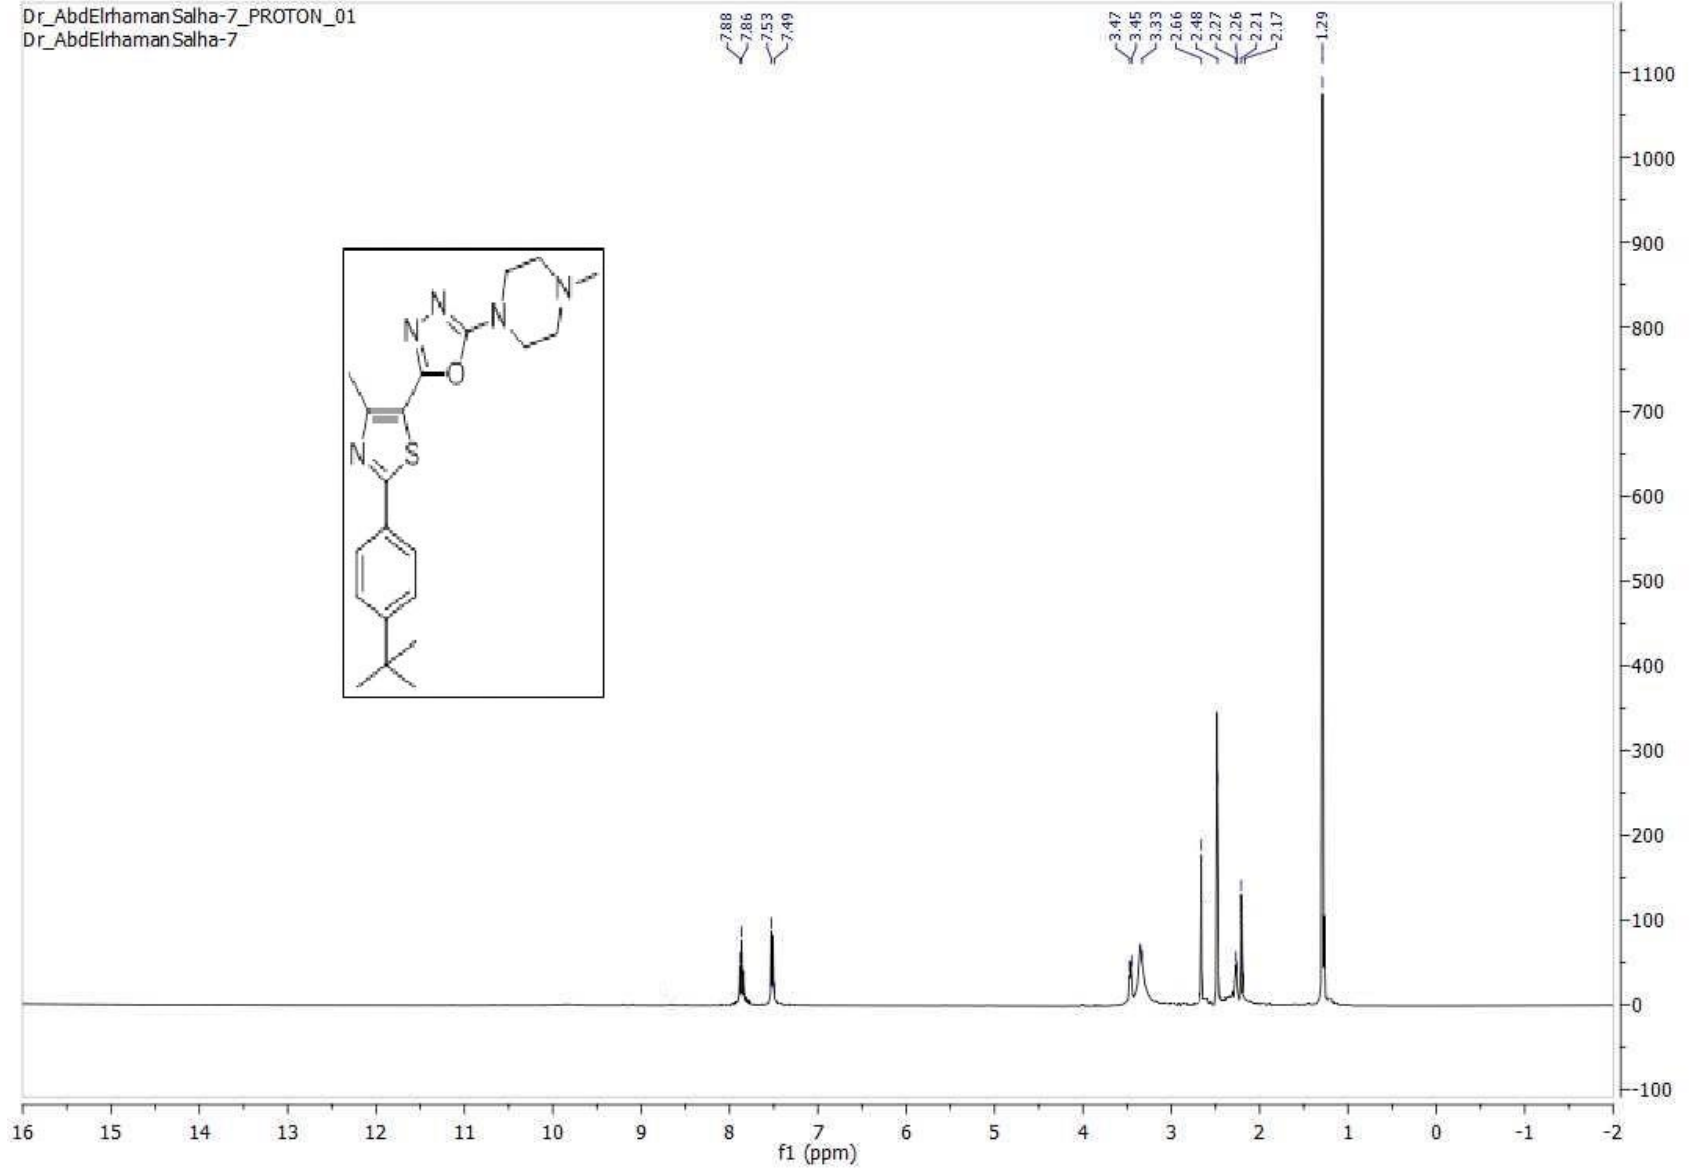

Dr\_AbdElrhamanSalha-7\_CARBON\_01  
Dr\_AbdElrhamanSalha-7

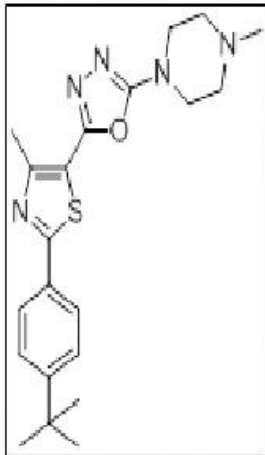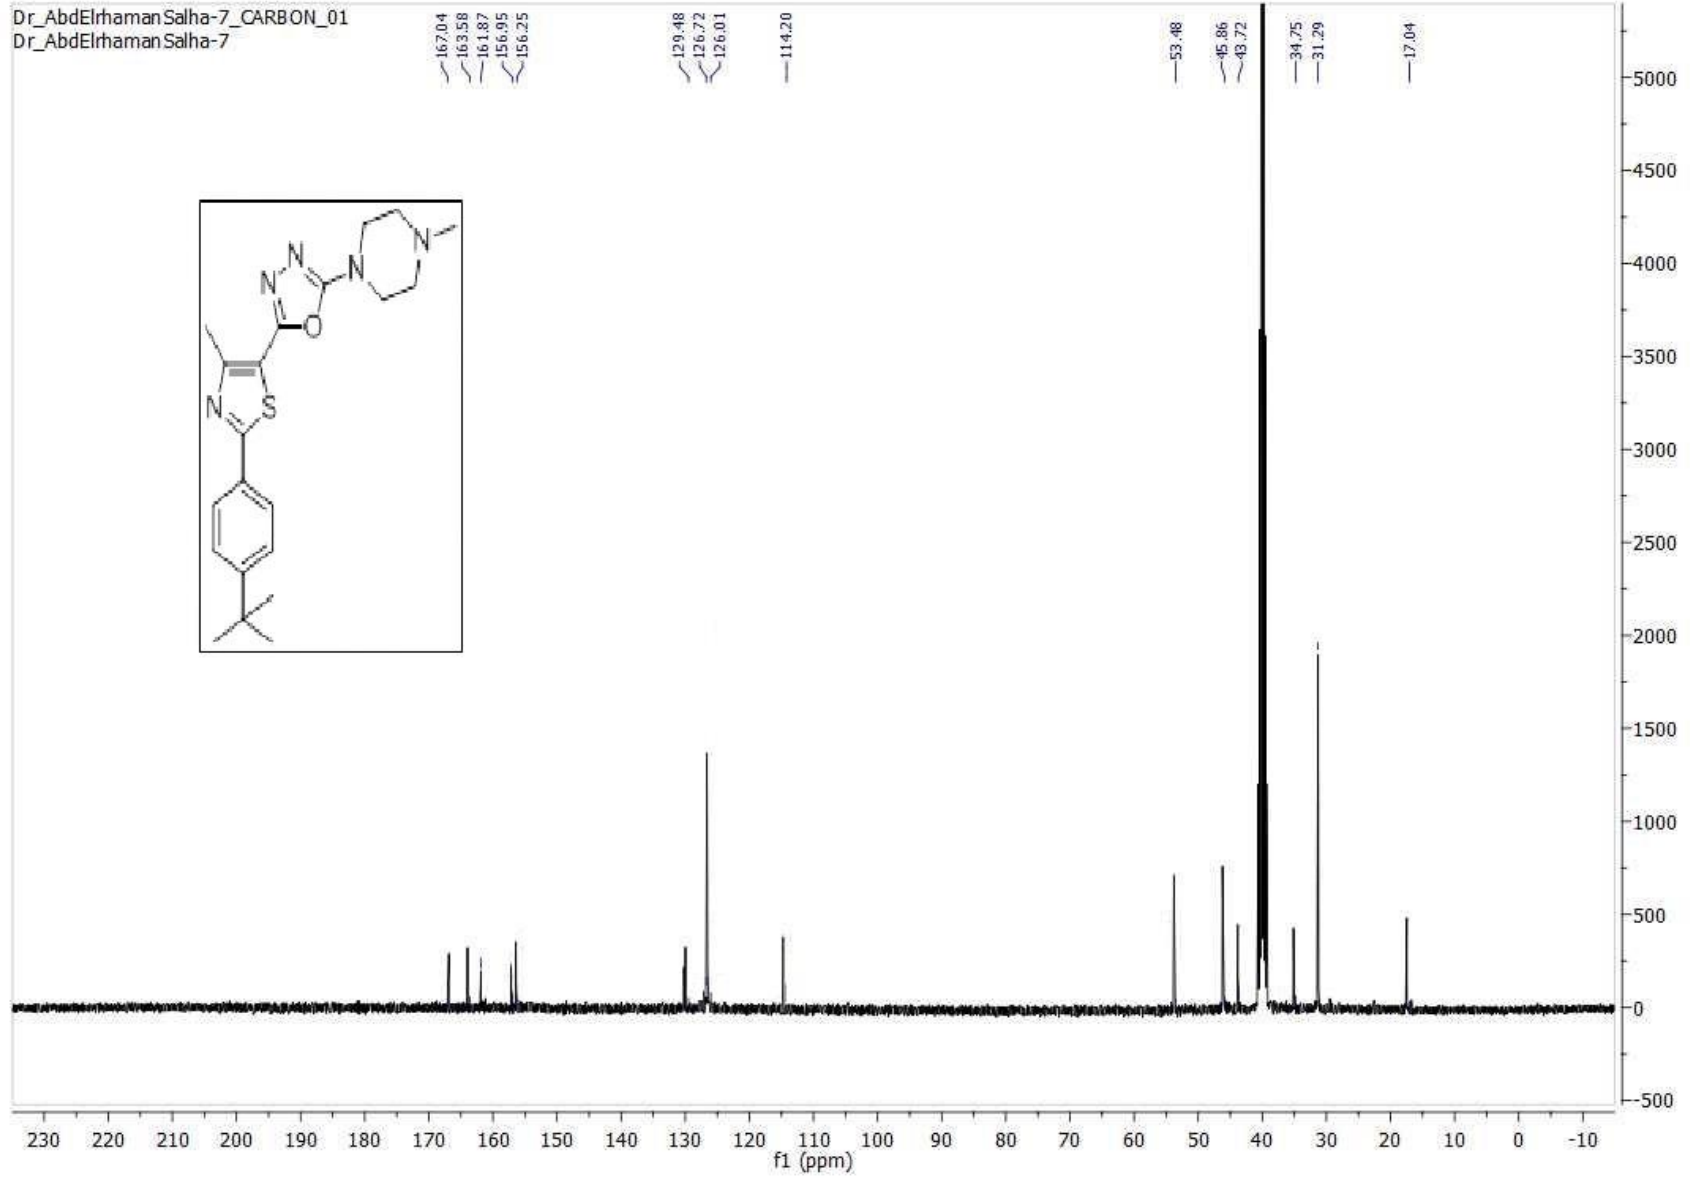

Mohamed Mostafa\_H\_Qt-16

Microanalytical Unit - FOPCU - NMR laboratory  
www.pharma.cu.edu.eg dir-mau.fopcu@pharma.cu.edu.eg

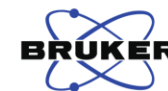

Current Data Parameters  
NAME Mohamed Mostafa\_H\_Qt-16  
EXPNO 10  
PROCNO 1

F2 - Acquisition Parameters  
Date\_ 20171116  
Time 4.44  
INSTRUM spect  
PROBHD 5 mm FAPBO BB/  
PULPROG zg30  
TD 65536  
SOLVENT DMSO  
NS 32  
DS 2  
SWH 8012.820 Hz  
FIDRES 0.122266 Hz  
AQ 4.0894465 sec  
RG 64.21  
DW 62.400 usec  
DE 6.50 usec  
TE 298.1 K  
D1 1.00000000 sec  
TDO 1

----- CHANNEL f1 -----  
SFO1 400.1924713 MHz  
NUC1 1H  
P1 15.00 usec  
PLW1 10.39999962 W

F2 - Processing parameters  
SI 65536  
SF 400.1900000 MHz  
WDW EM  
SSB 0  
LB 0.30 Hz  
GB 0  
PC 1.00

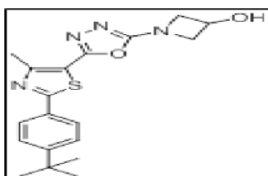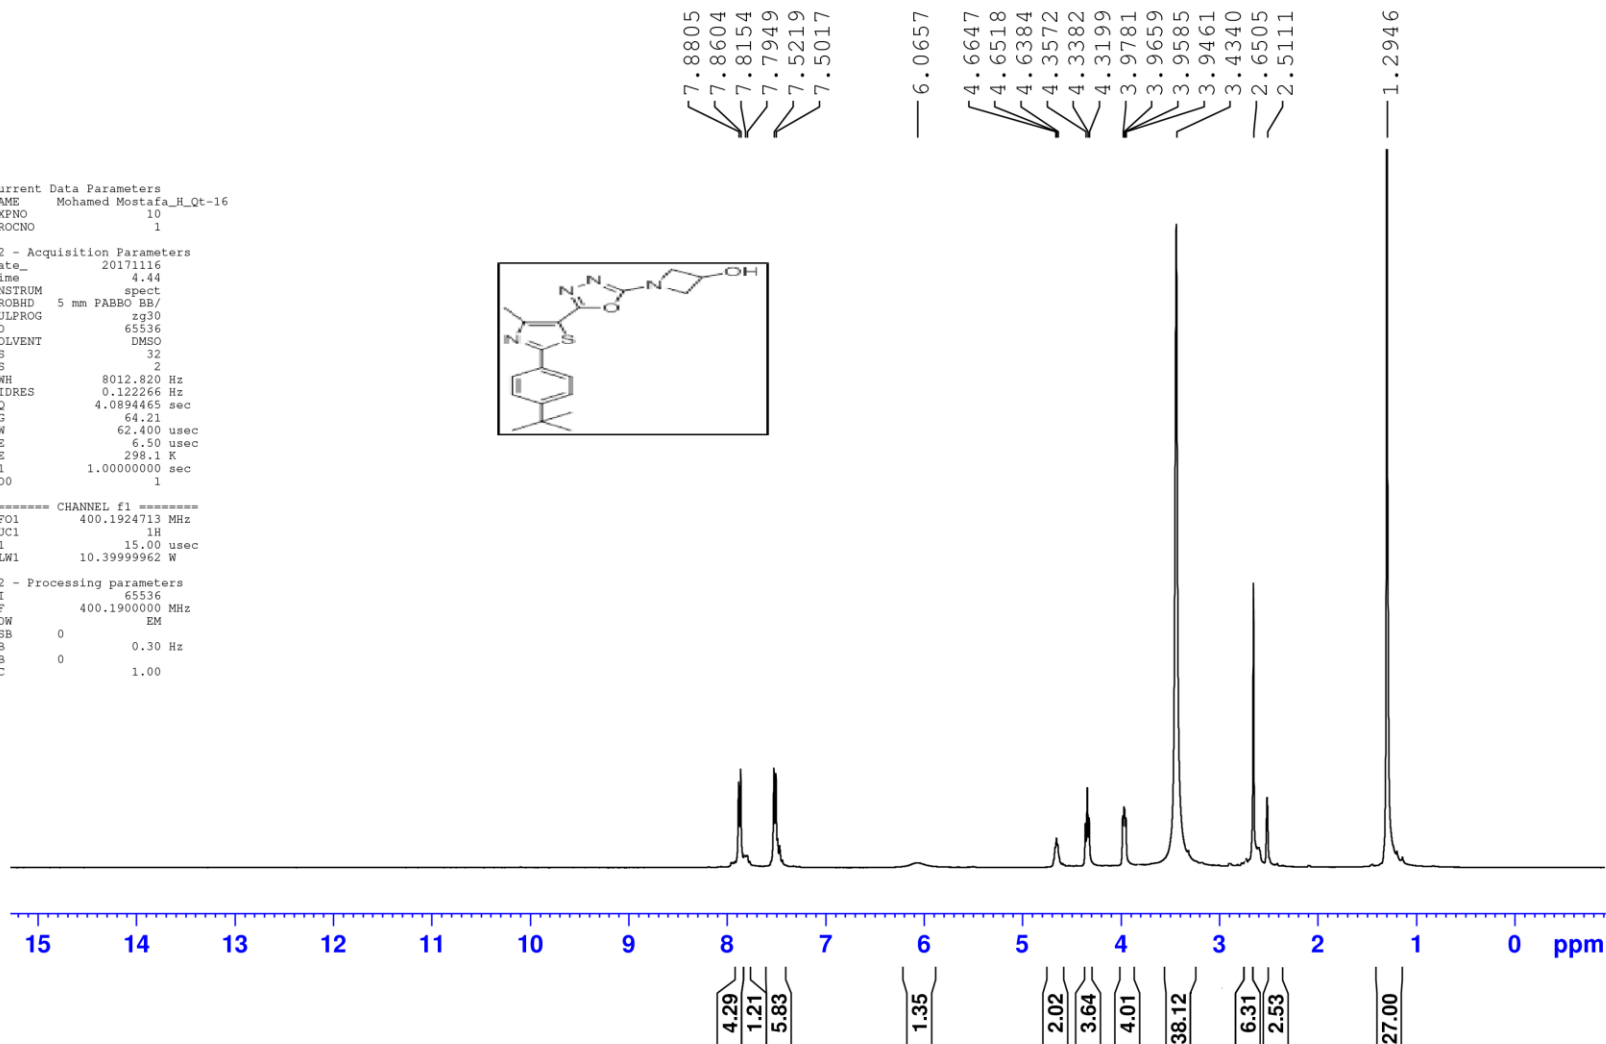

Mohamed Mostafa\_C\_Qt-16

Microanalytical Unit - FOPCU - NMR laboratory  
www.pharma.cu.edu.eg dir-mau.fopcu@pharma.cu.edu.eg

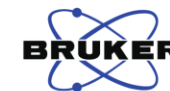

166.98  
164.76  
154.49  
154.45  
154.42  
129.95  
126.63  
126.42  
114.61  
62.36  
62.18  
40.56  
40.35  
40.15  
39.94  
39.73  
39.52  
39.31  
35.14  
31.33  
31.29  
17.42

Current Data Parameters  
NAME Mohamed Mostafa\_C\_Qt-16  
EXPNO 10  
PROCNO 1

F2 - Acquisition Parameters  
Date\_ 20171116  
Time 5.54  
INSTRUM spect  
PROBHD 5 mm PABBO BB/  
PULPROG zgpg30  
TD 65536  
SOLVENT DMSO  
NS 1200  
DS 4  
SWH 24038.461 Hz  
FIDRES 0.366798 Hz  
AQ 1.3631488 sec  
RG 202.37  
DW 20.800 usec  
DE 6.50 usec  
TE 299.4 K  
D1 2.00000000 sec  
D11 0.03000000 sec  
TD0 1

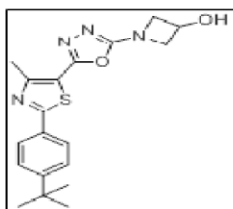

==== CHANNEL f1 =====  
SFO1 100.6379178 MHz  
NUC1 13C  
P1 10.00 usec  
PLW1 45.00000000 W  
==== CHANNEL f2 =====  
SFO2 400.1916008 MHz  
NUC2 1H  
CPDPRG[2] waltz16

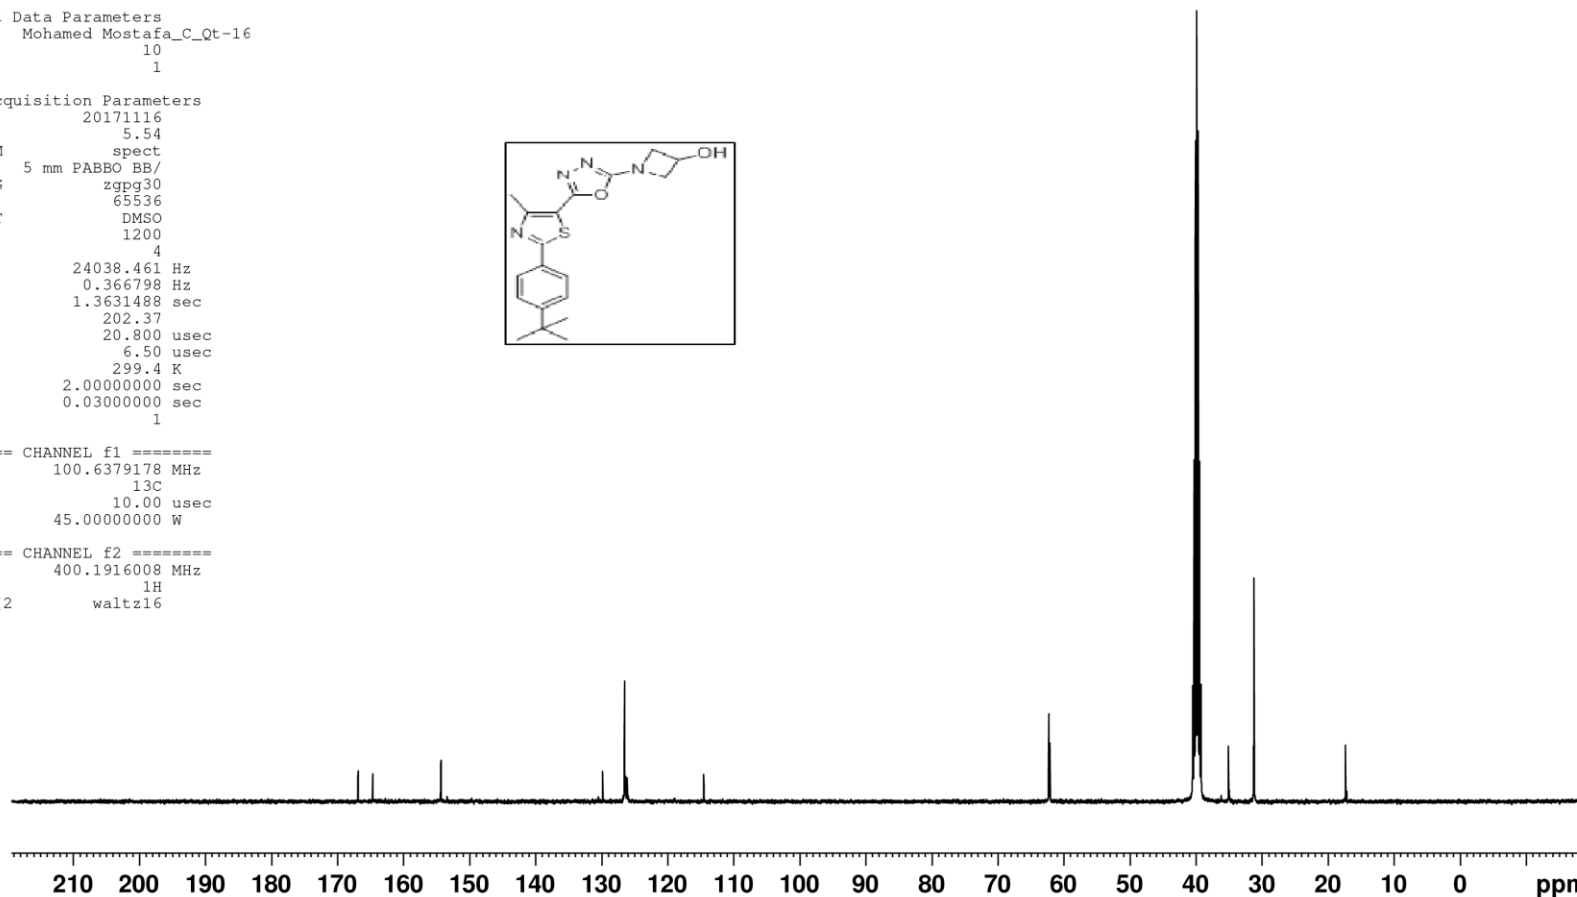



Mohamed Moustafa\_H\_Qt29  
Mohamed Moustafa\_H\_Qt29

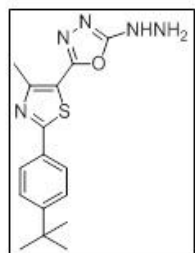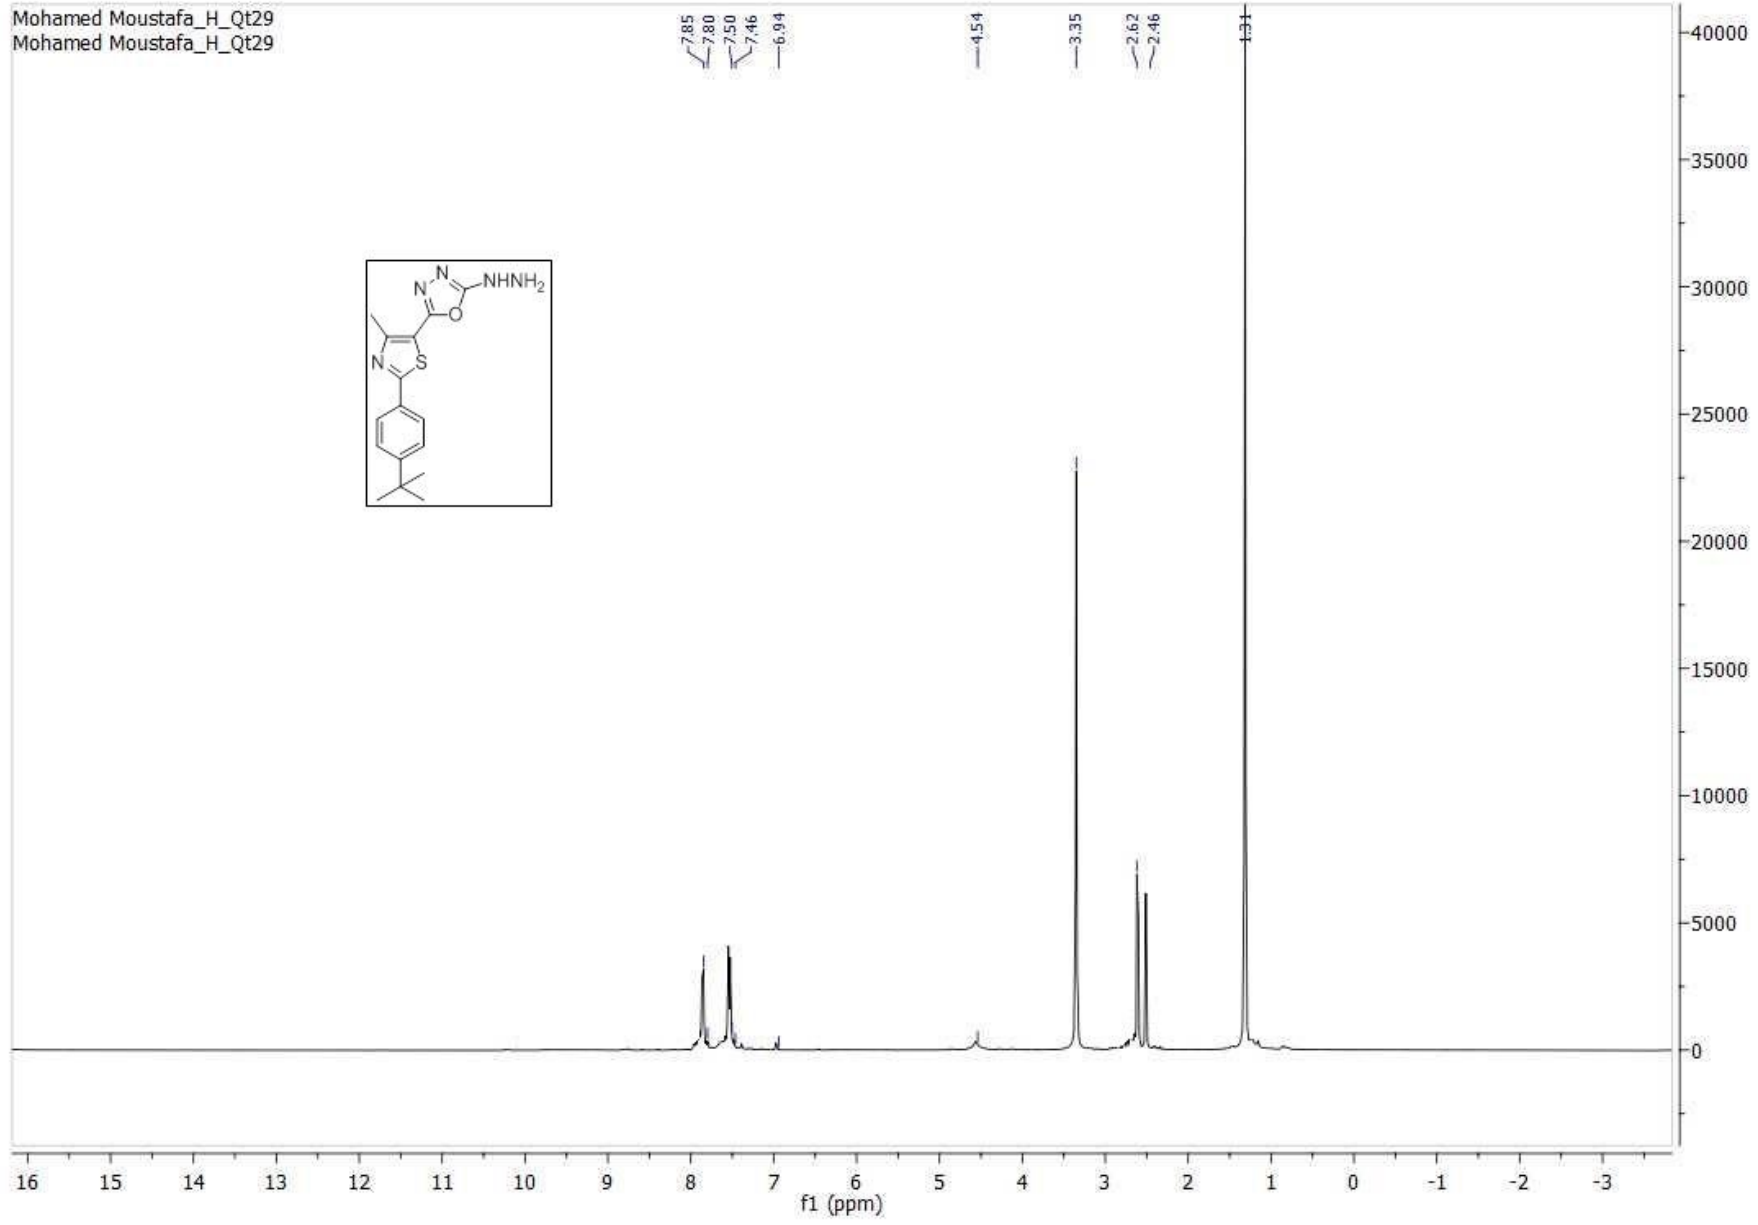

Mohamed Moustafa\_C\_Qt29  
Mohamed Moustafa\_C\_Qt29

166.39  
163.24  
155.71  
155.25  
154.18  
130.32  
126.60  
126.53  
124.68

40.62  
40.41  
40.20  
39.99  
39.78  
39.57  
39.37  
35.14  
31.34  
17.58

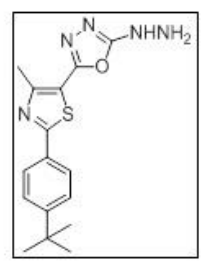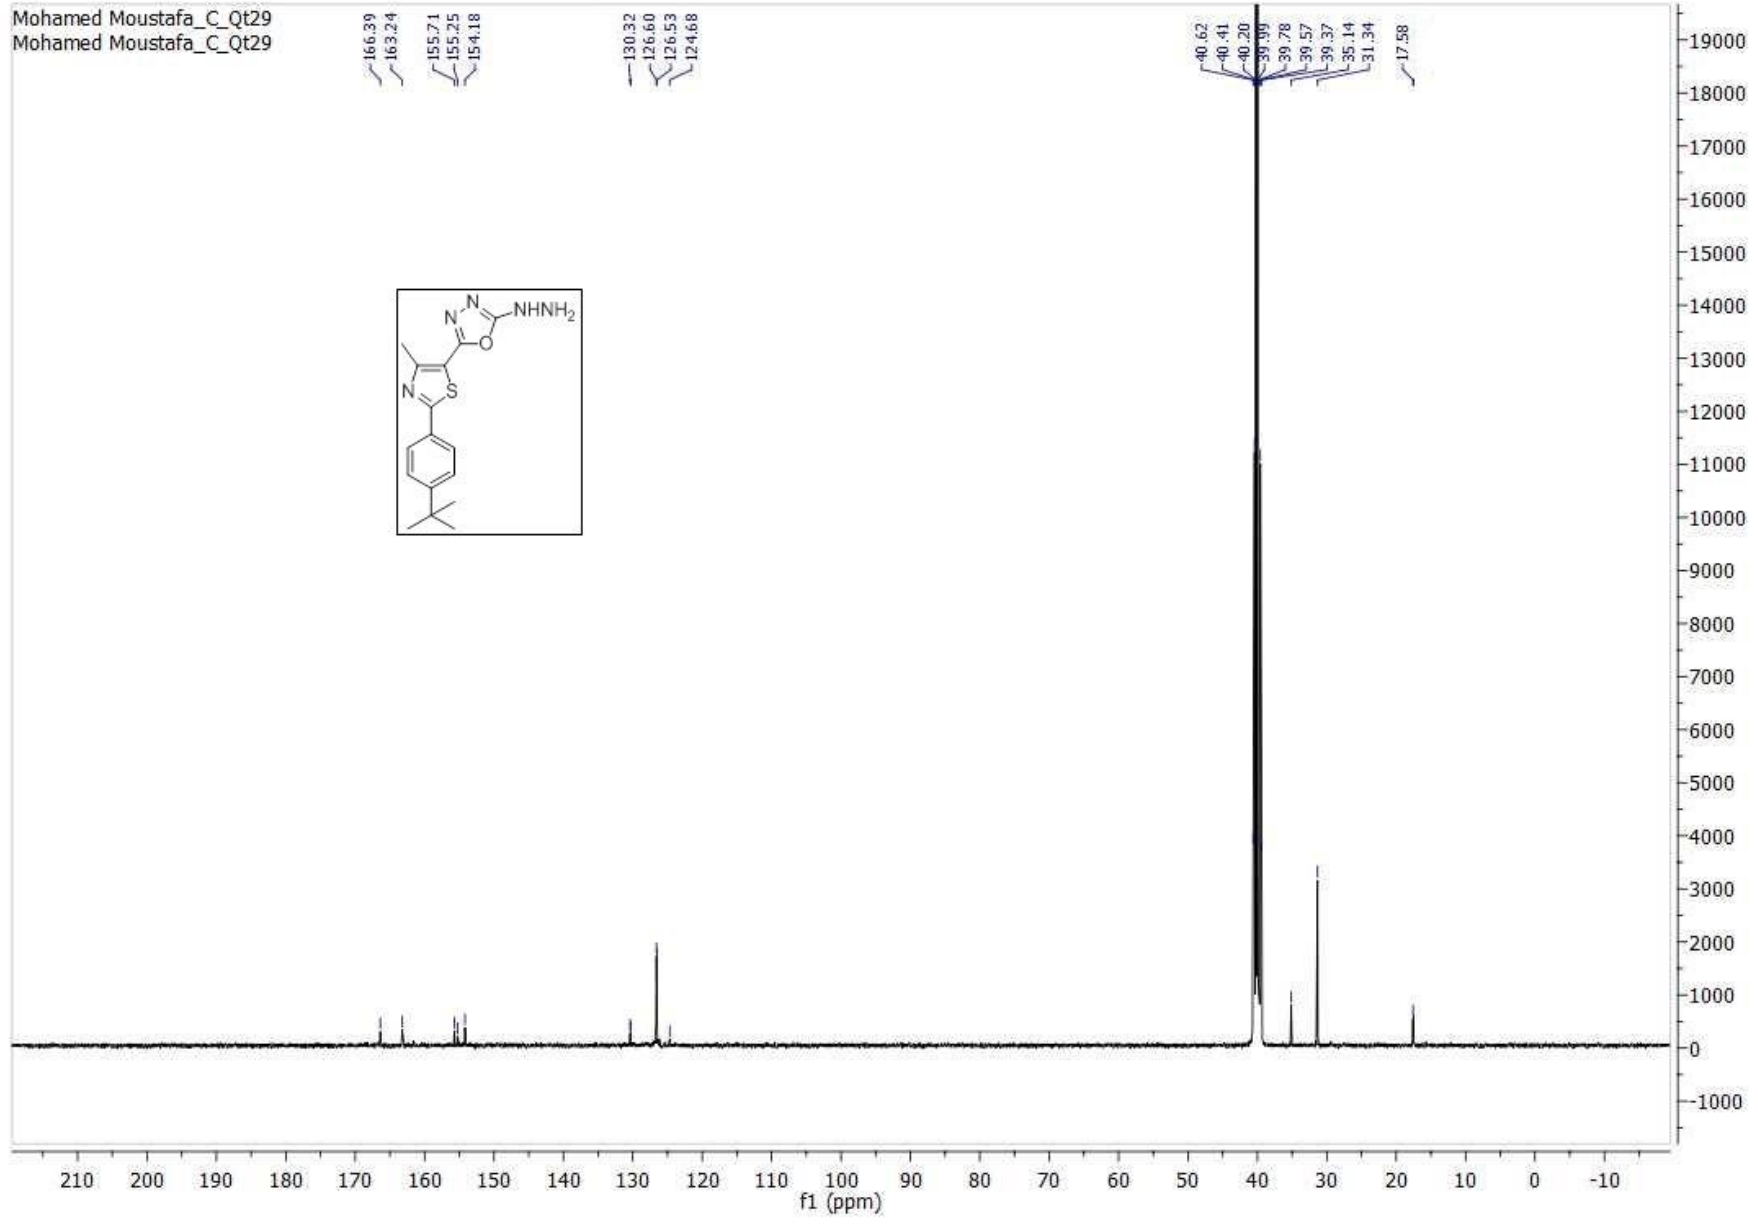

Dr\_AbdelrahmanSaleh-14\_PROTON\_01  
Dr\_AbdelrahmanSaleh-14

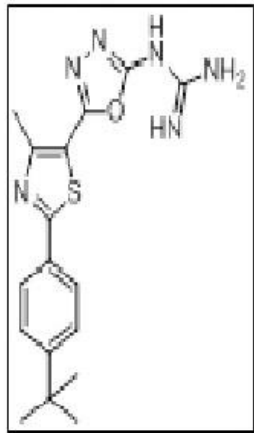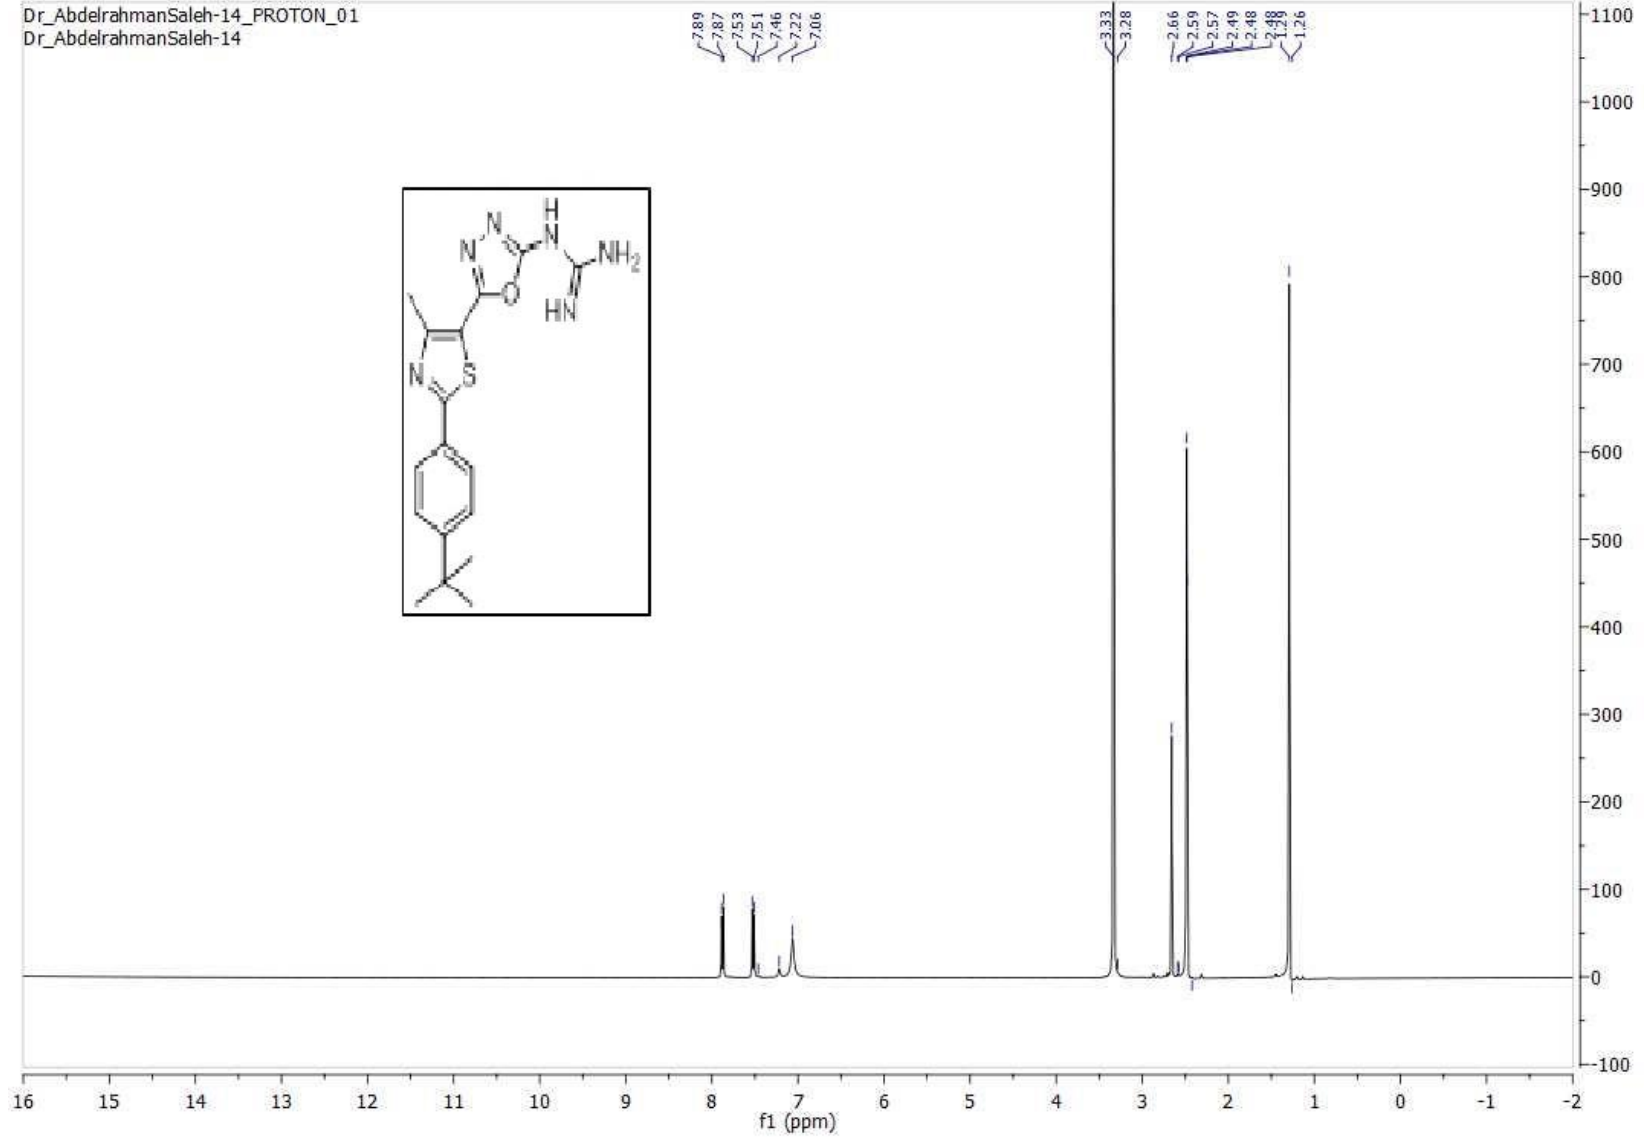

Dr\_AbdelrahmanSaleh-14\_CARBON\_01  
Dr\_AbdelrahmanSaleh-14

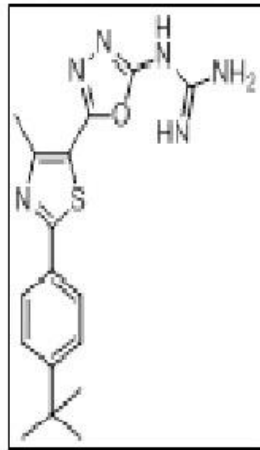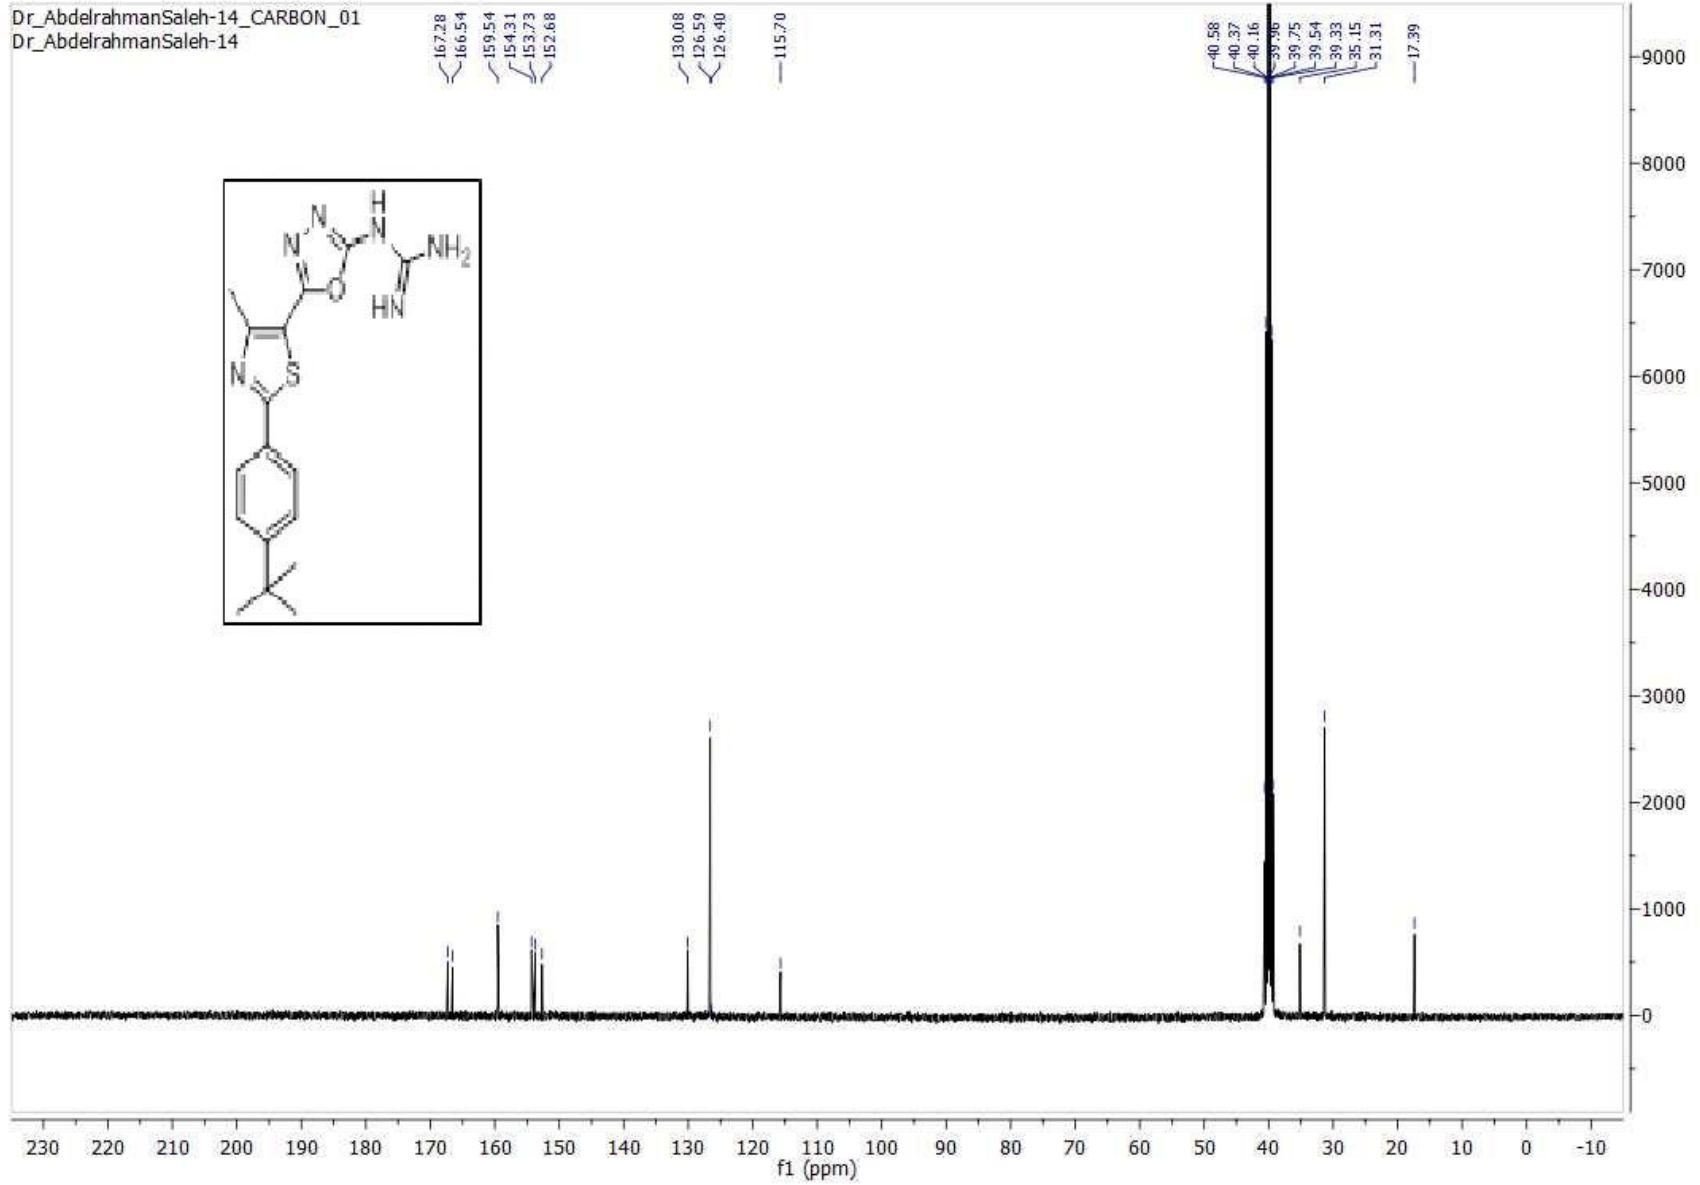

Mohamed Mostafa\_H\_Qt-20

Microanalytical Unit - FOPCU - NMR laboratory  
www.pharma.cu.edu.eg dir-mau.fopcu@pharma.cu.edu.eg

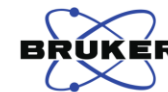

Current Data Parameters  
NAME Mohamed Mostafa\_H\_Qt-20  
EXPNO 10  
PROCNO 1

F2 - Acquisition Parameters  
Date\_ 20171116  
Time 12.14  
INSTRUM spect  
PROBHD 5 mm PABBO BB/  
PULPROG zg30  
TD 65536  
SOLVENT DMSO  
NS 32  
DS 2  
SWH 8012.820 Hz  
FIDRES 0.122266 Hz  
AQ 4.0894465 sec  
RG 84.65  
DW 62.400 usec  
DE 6.50 usec  
TE 298.0 K  
D1 1.00000000 sec  
TDO 1

===== CHANNEL f1 =====  
SF01 400.1924713 MHz  
NUC1 1H  
P1 15.00 usec  
PLW1 10.39999962 W

F2 - Processing parameters  
SI 65536  
SF 400.1900000 MHz  
WDW EM  
SSB 0  
LB 0.30 Hz  
GB 0  
PC 1.00

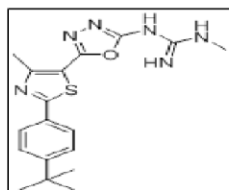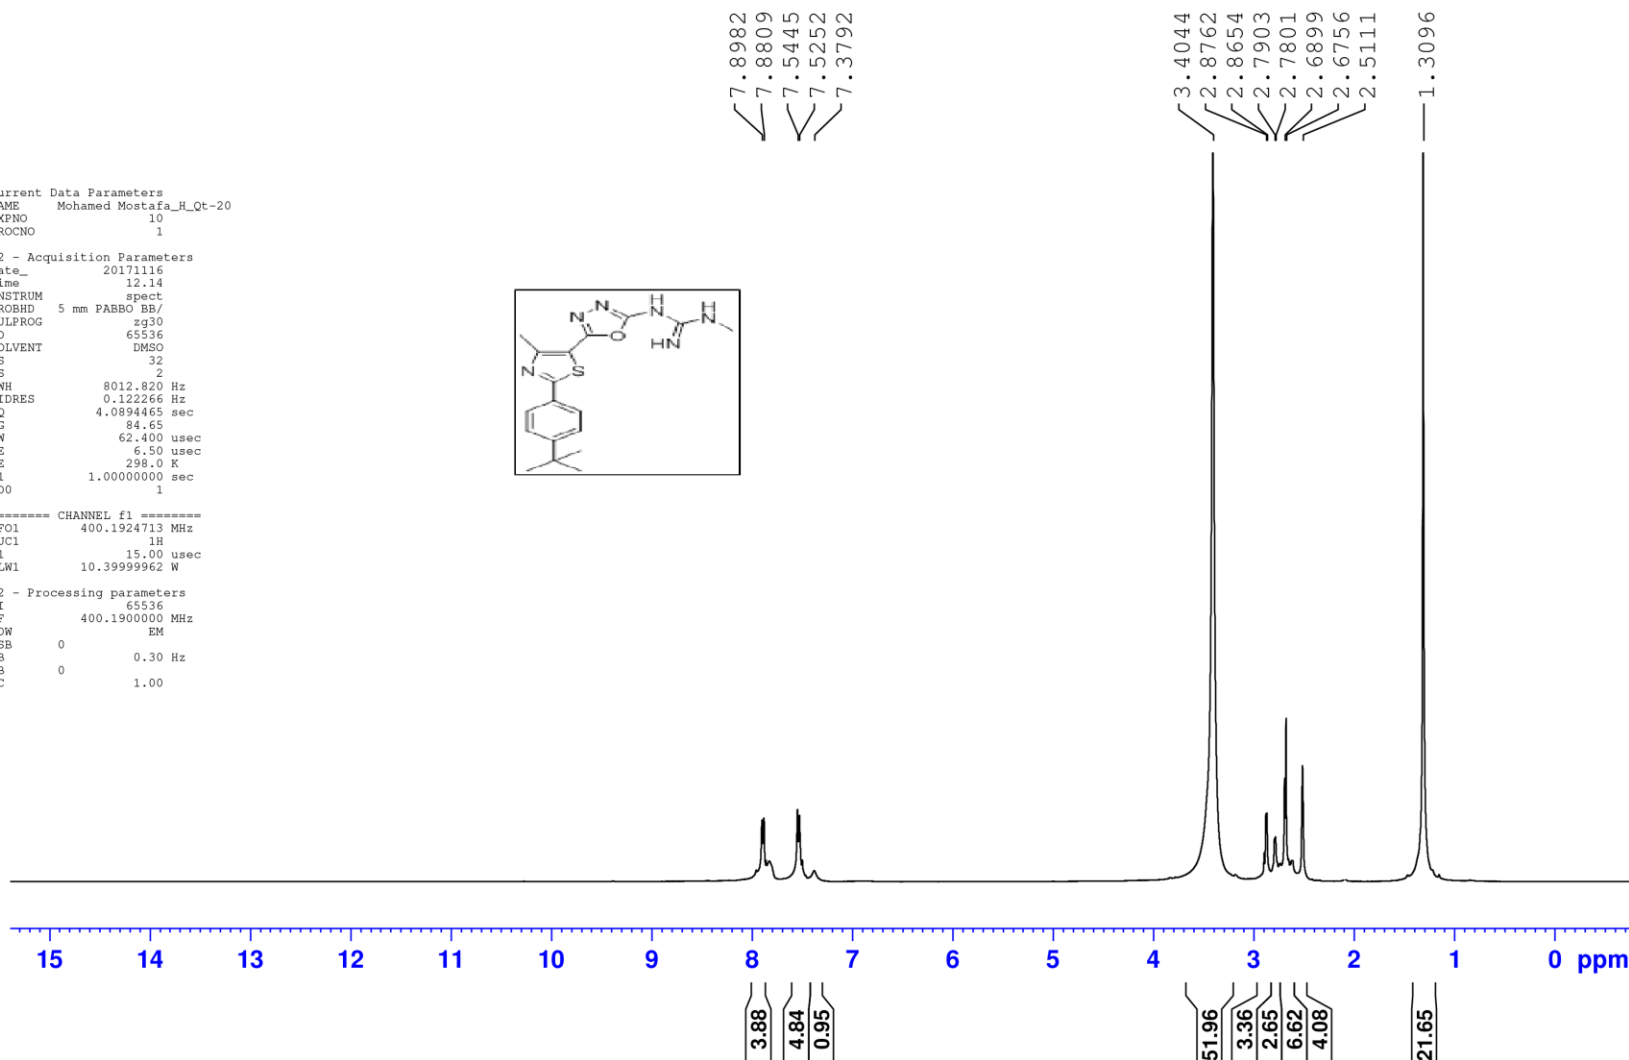

Mohamed Mostafa\_C\_Qt-20

Microanalytical Unit - FOPCU - NMR laboratory  
www.pharma.cu.edu.eg dir-mau.fopcu@pharma.cu.edu.eg

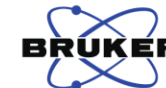

166.58  
164.24  
154.39  
153.85  
153.08  
130.10  
130.03  
126.62  
126.58  
115.01  
40.58  
40.37  
40.16  
39.96  
39.75  
39.54  
39.33  
35.16  
31.31  
29.50  
17.40

Current Data Parameters  
NAME Mohamed Mostafa\_C\_Qt-20  
EXPNO 10  
PROCNO 1

F2 - Acquisition Parameters  
Date\_ 20171116  
Time 13.24  
INSTRUM spect  
PROBHD 5 mm PABBO BB/  
PULPROG zgpg30  
TD 65536  
SOLVENT DMSO  
NS 1200  
DS 4  
SWH 24038.461 Hz  
FIDRES 0.366798 Hz  
AQ 1.3631488 sec  
RG 202.37  
DW 20.800 usec  
DE 6.50 usec  
TE 298.1 K  
D1 2.00000000 sec  
D11 0.03000000 sec  
TD0 1

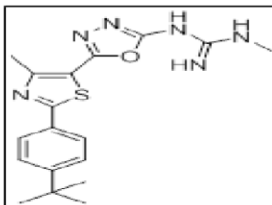

==== CHANNEL f1 =====  
SFO1 100.6379178 MHz  
NUC1 13C  
P1 10.00 usec  
PLW1 45.00000000 W  
==== CHANNEL f2 =====  
SFO2 400.1916008 MHz  
NUC2 1H  
CPDPRG[2 waltz16

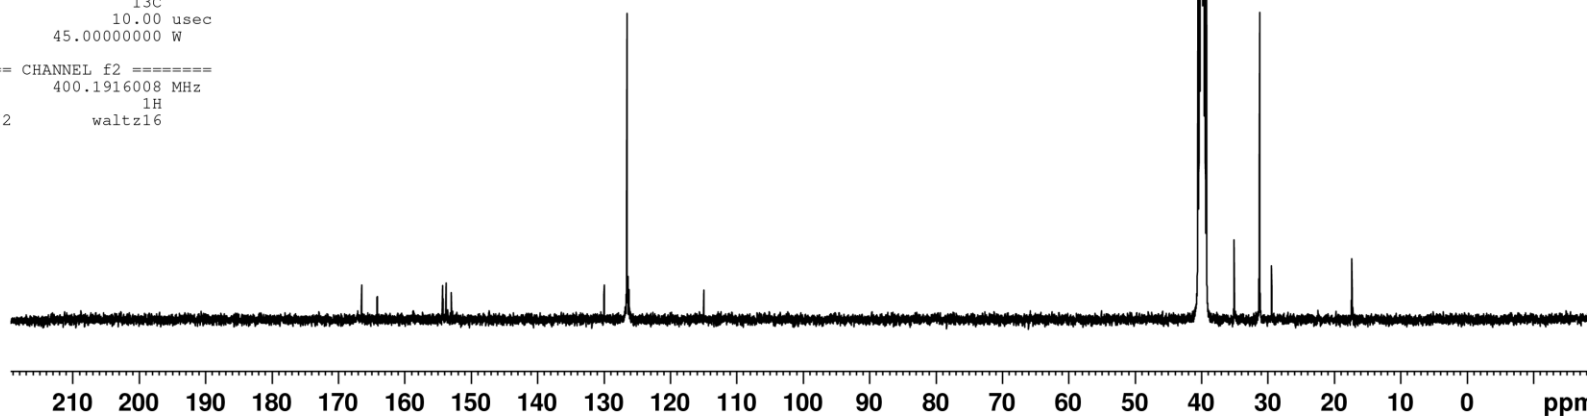

Dr\_AbdelrahmanSaleh-13\_PROTON\_01  
Dr\_AbdelrahmanSaleh-13

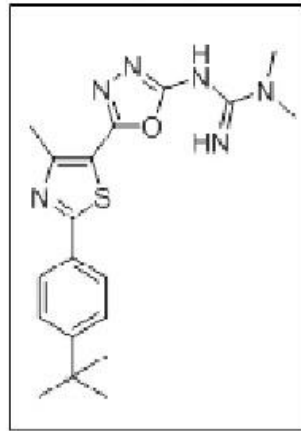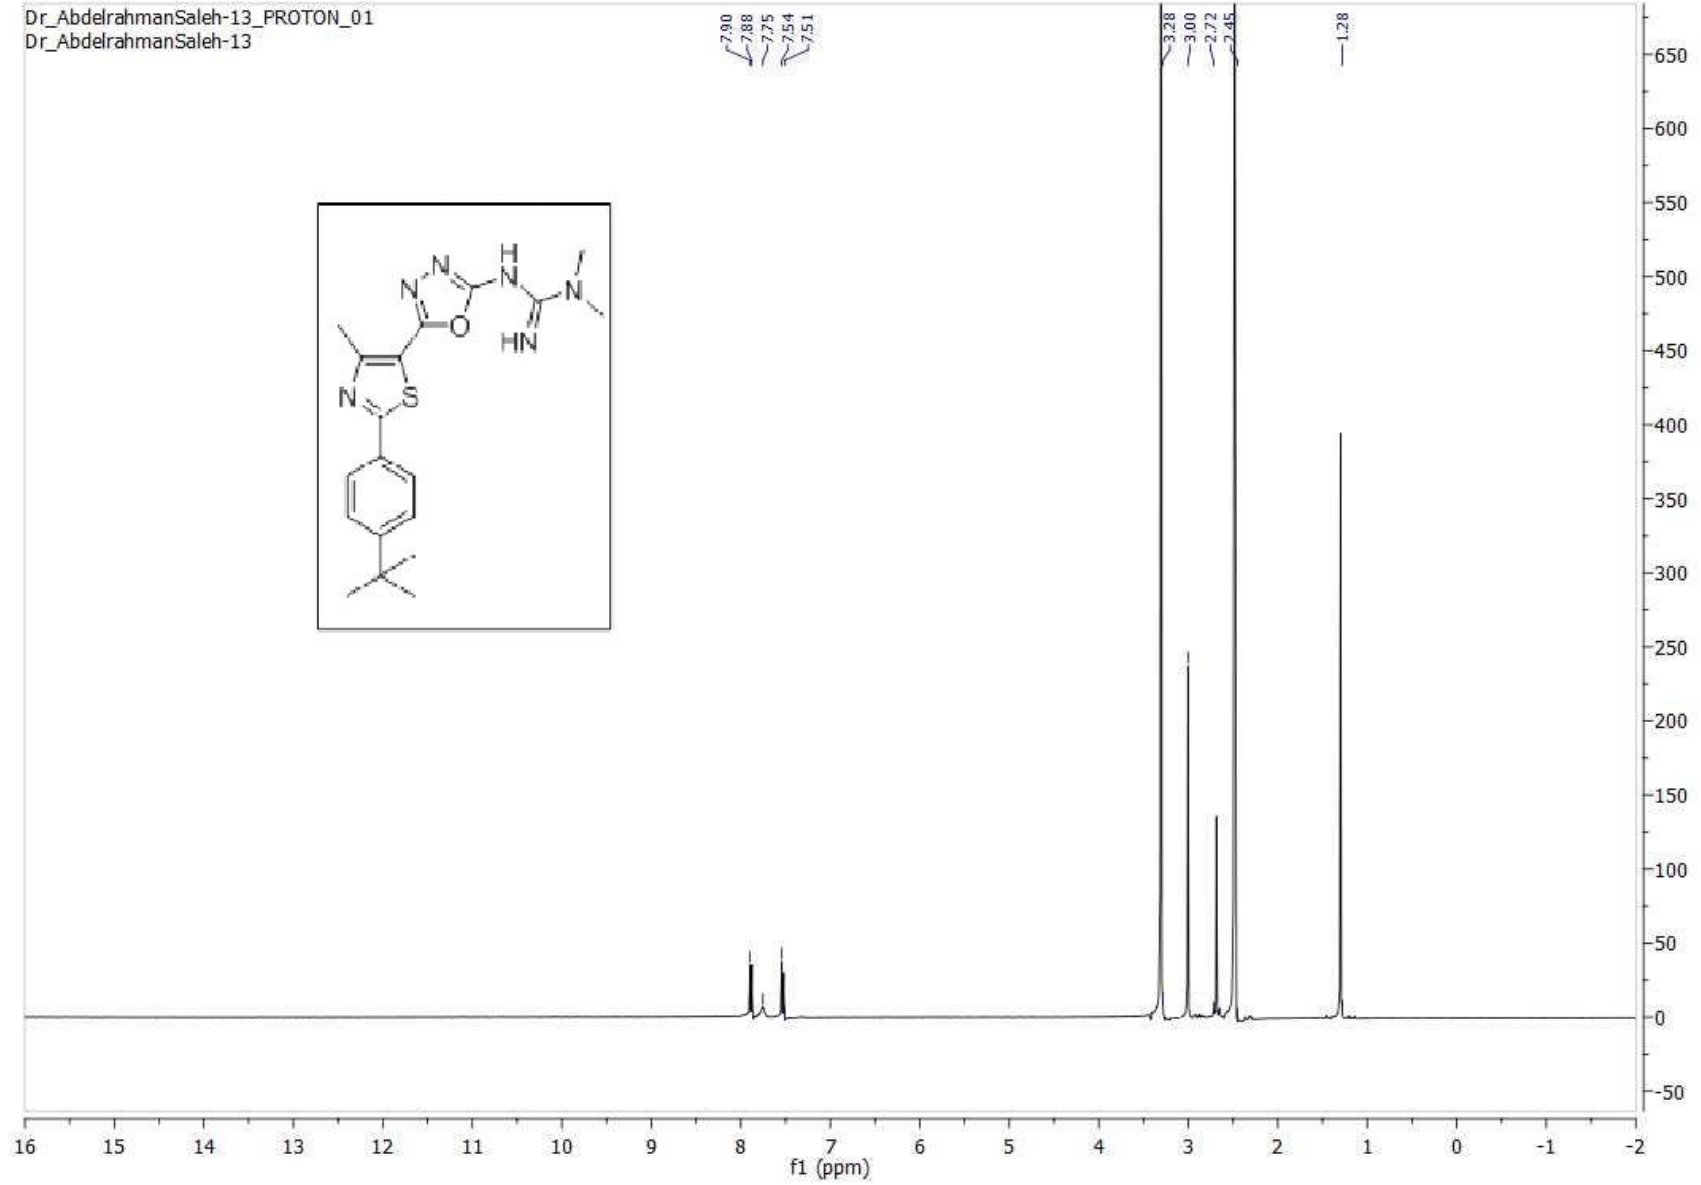

Dr\_AbdelrahmanSaleh-13\_CARBON\_01  
Dr\_AbdelrahmanSaleh-13

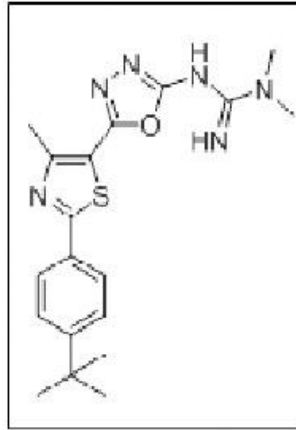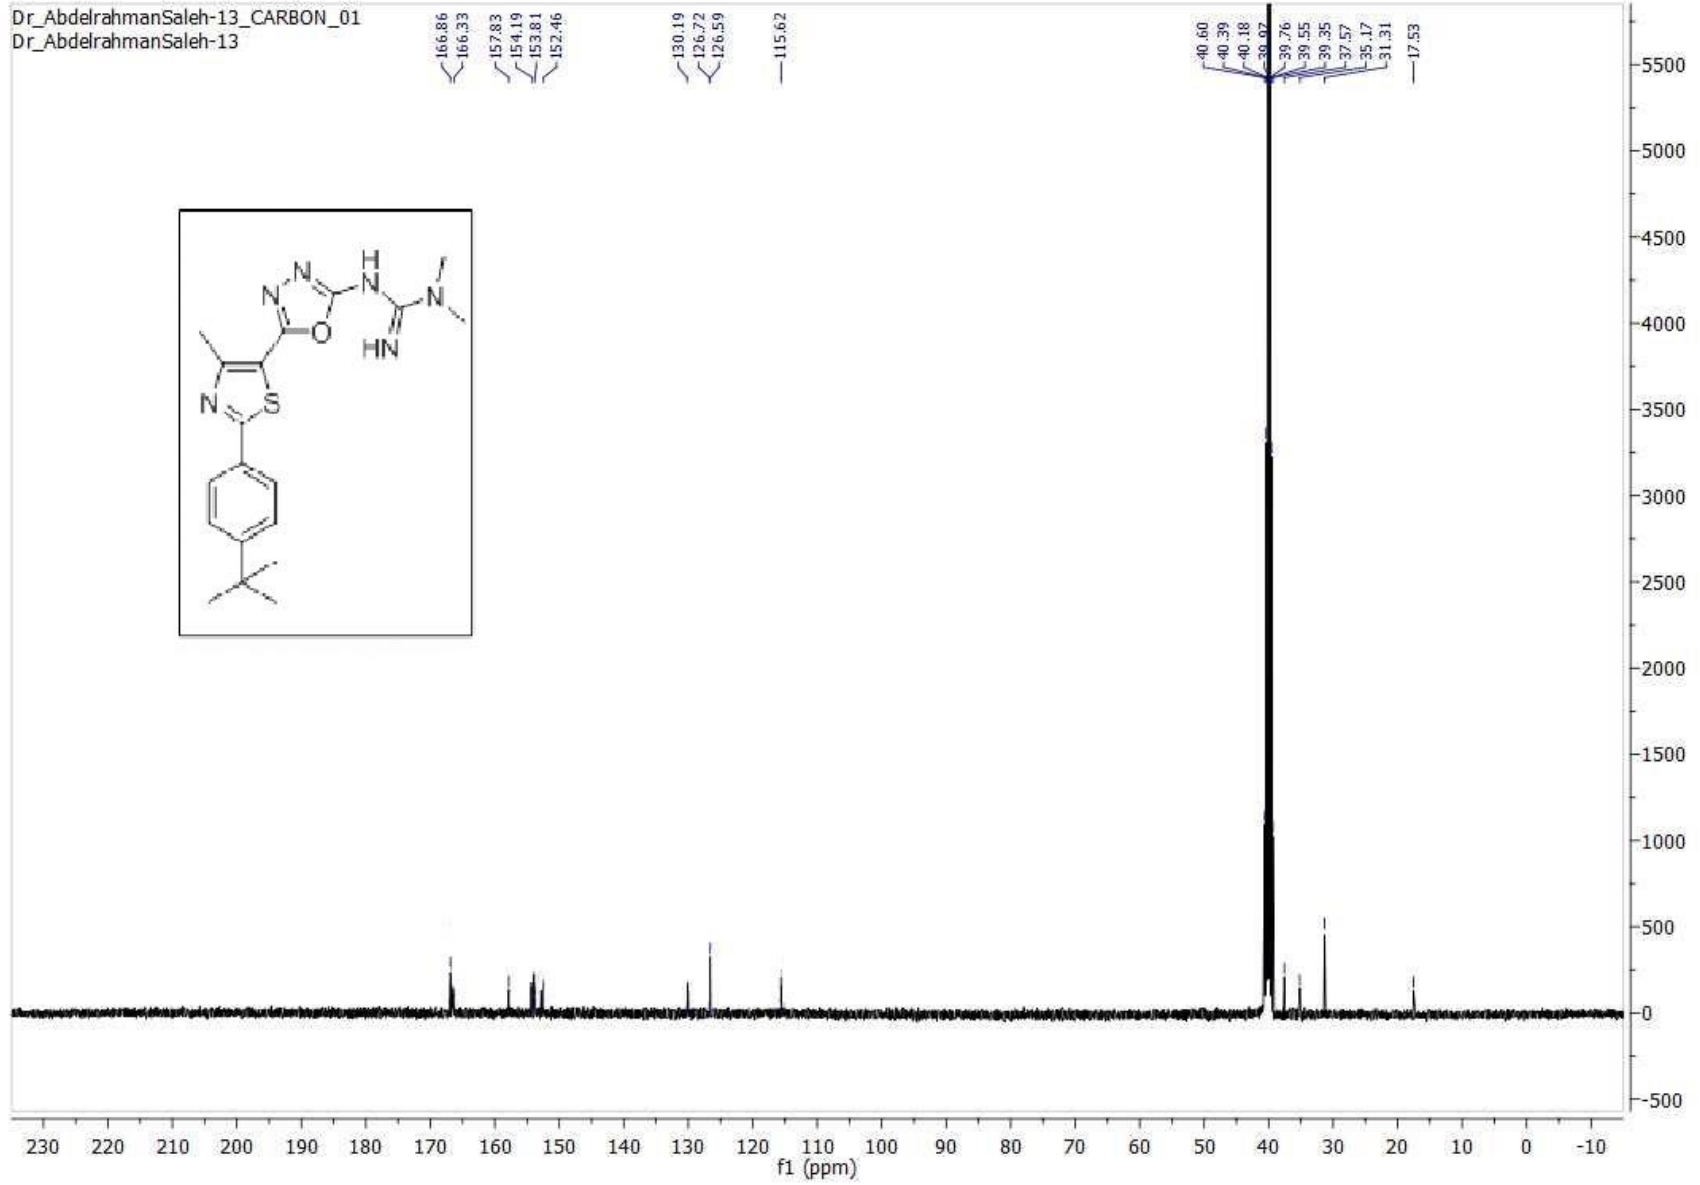



Mohamed Mostafa\_H\_Qt-15

Microanalytical Unit - FOPCU - NMR laboratory  
www.pharma.cu.edu.eg dir-mau.fopcu@pharma.cu.edu.eg

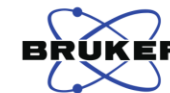

Current Data Parameters  
NAME Mohamed Mostafa\_H\_Qt-15  
EXPNO 10  
PROCNO 1

F2 - Acquisition Parameters  
Date\_ 20171115  
Time 16.12  
INSTRUM spect  
PROBHD 5 mm PABBO BB/  
PULPROG zg30  
TD 65536  
SOLVENT DMSO  
NS 32  
DS 2  
SWH 8012.820 Hz  
FIDRES 0.122266 Hz  
AQ 4.0894465 sec  
RG 91.58  
DW 62.400 usec  
DE 6.50 usec  
TE 298.1 K  
D1 1.0000000 sec  
TDO 1

===== CHANNEL f1 =====  
SFO1 400.1924713 MHz  
NUC1 1H  
P1 15.00 usec  
PLW1 10.39999962 W

F2 - Processing parameters  
SI 65536  
SF 400.1900000 MHz  
WDW EM  
SSB 0  
LB 0.30 Hz  
GB 0  
PC 1.00

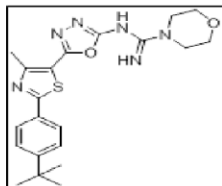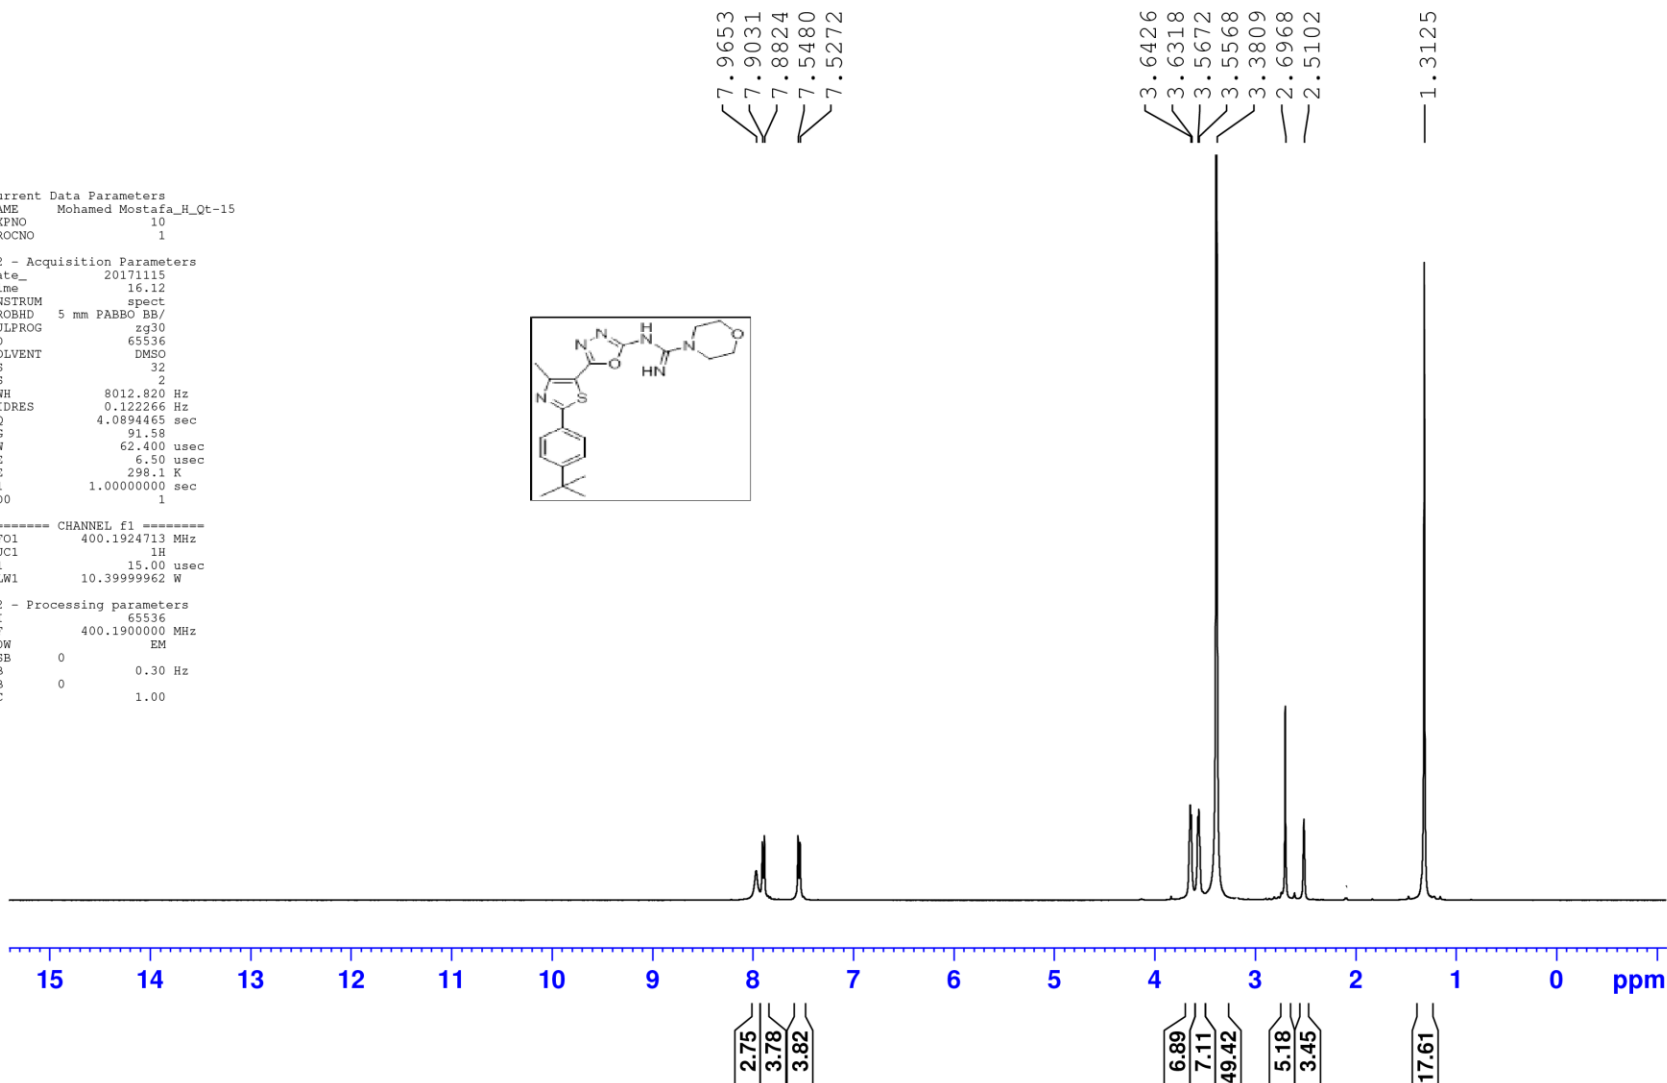

Mohamed Mostafa\_C\_Qt-15

Microanalytical Unit - FOPCU - NMR laboratory  
www.pharma.cu.edu.eg dir-mau.fopcu@pharma.cu.edu.eg

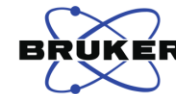

166.90  
166.80  
157.22  
154.39  
154.15  
153.21  
130.07  
126.62  
126.58  
115.48  
66.16  
44.88  
40.58  
40.37  
40.16  
39.96  
39.75  
39.54  
39.33  
35.16  
31.31  
17.52

Current Data Parameters  
NAME Mohamed Mostafa\_C\_Qt-15  
EXPNO 10  
PROCNO 1

F2 - Acquisition Parameters

Date\_ 20171115  
Time 17.22  
INSTRUM spect  
PROBHD 5 mm PABBO BB/  
PULPROG zgpg30  
TD 65536  
SOLVENT DMSO  
NS 1200  
DS 4  
SWH 24038.461 Hz  
FIDRES 0.366798 Hz  
AQ 1.3631488 sec  
RG 202.37  
DW 20.800 usec  
DE 6.50 usec  
TE 298.1 K  
D1 2.00000000 sec  
D11 0.03000000 sec  
TD0 1

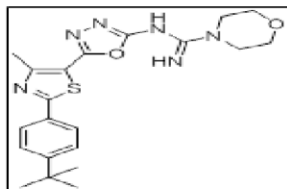

==== CHANNEL f1 =====  
SFO1 100.6379178 MHz  
NUC1 13C  
P1 10.00 usec  
PLW1 45.00000000 W  
  
==== CHANNEL f2 =====  
SFO2 400.1916008 MHz  
NUC2 1H  
CPDPRG[2] waltz16

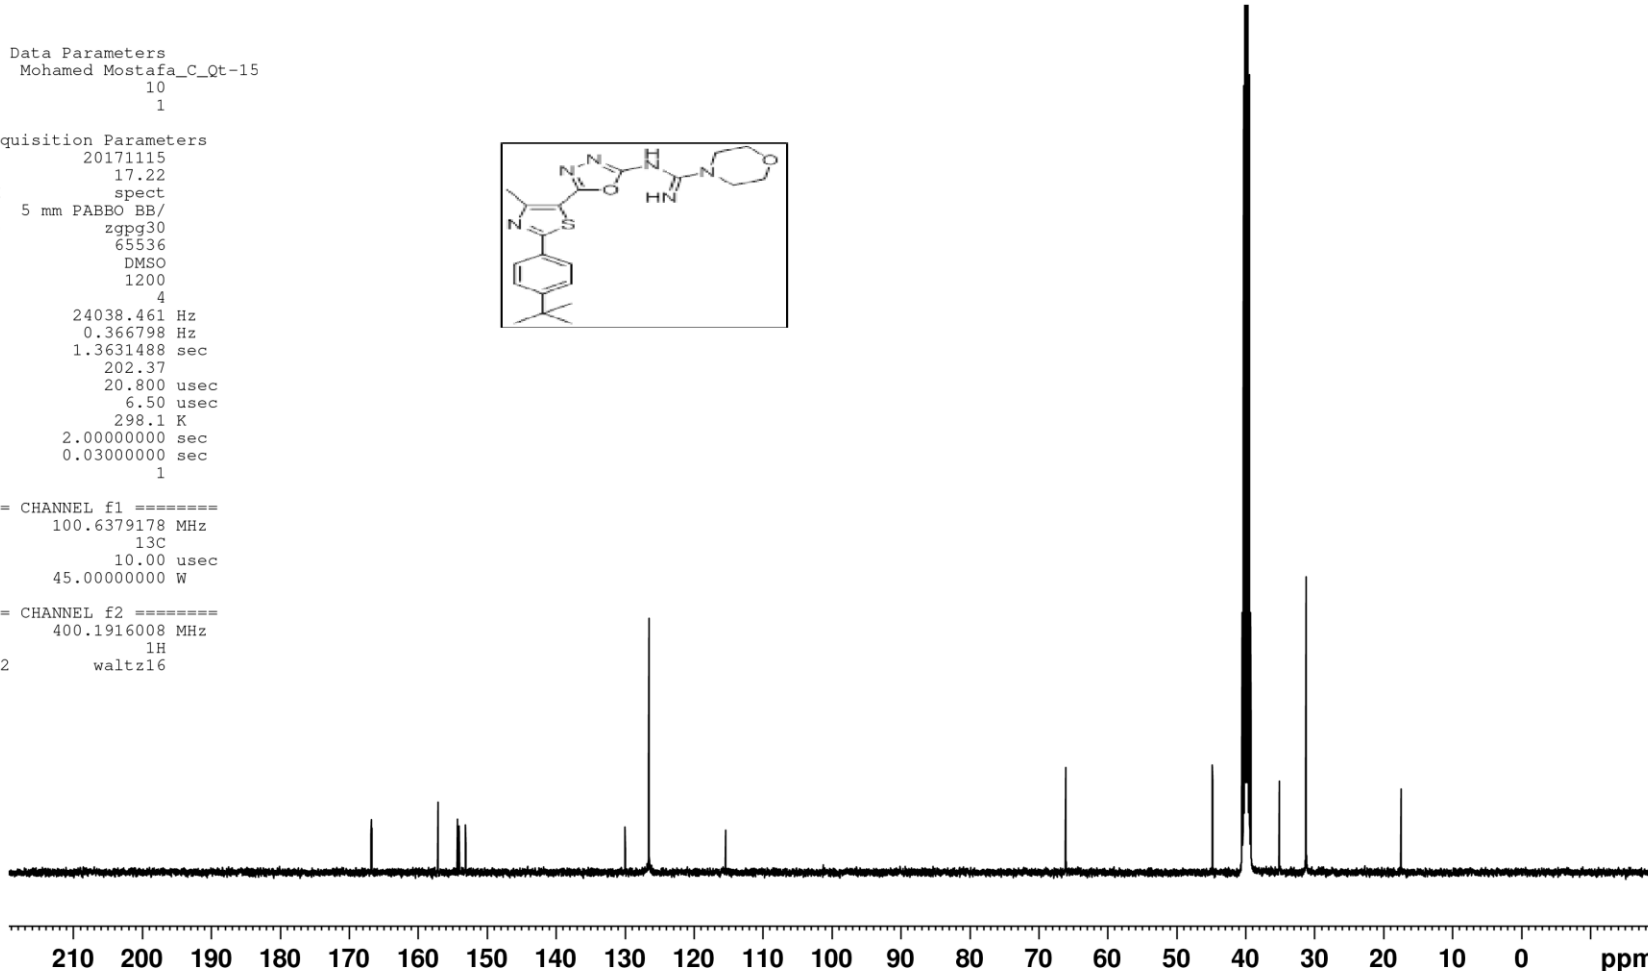

Mohamed Moustafa\_H\_Qt28  
Mohamed Moustafa\_H\_Qt28

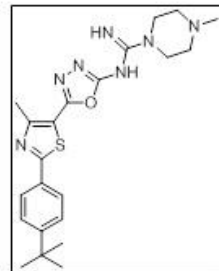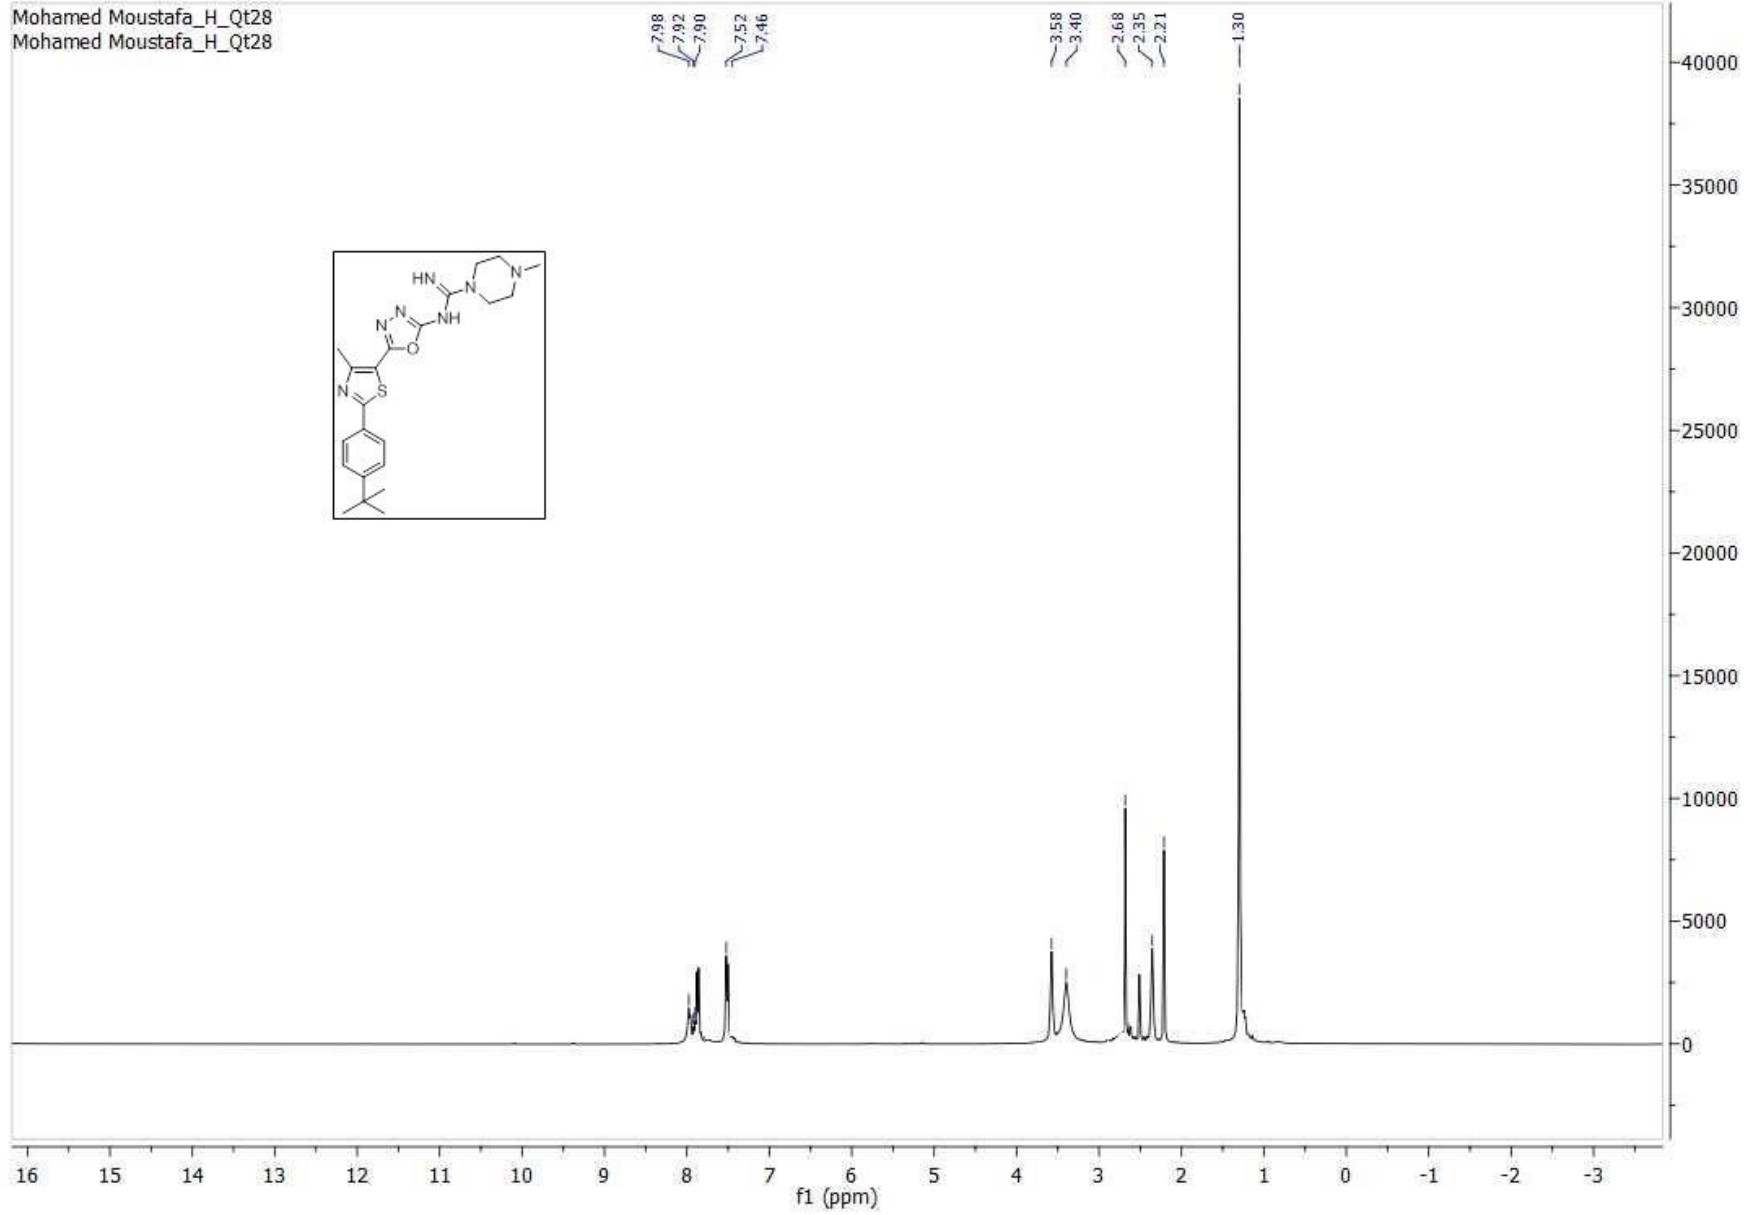

Mohamed Moustafa\_C\_Qt28  
Mohamed Moustafa\_C\_Qt28

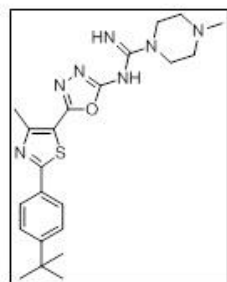

166.90  
166.69  
156.98  
154.31  
154.04  
153.08

130.09  
126.59  
126.56  
115.53

54.55  
45.96  
44.37  
40.61  
40.41  
40.20  
39.99  
39.78  
39.57  
35.13  
31.30  
31.29

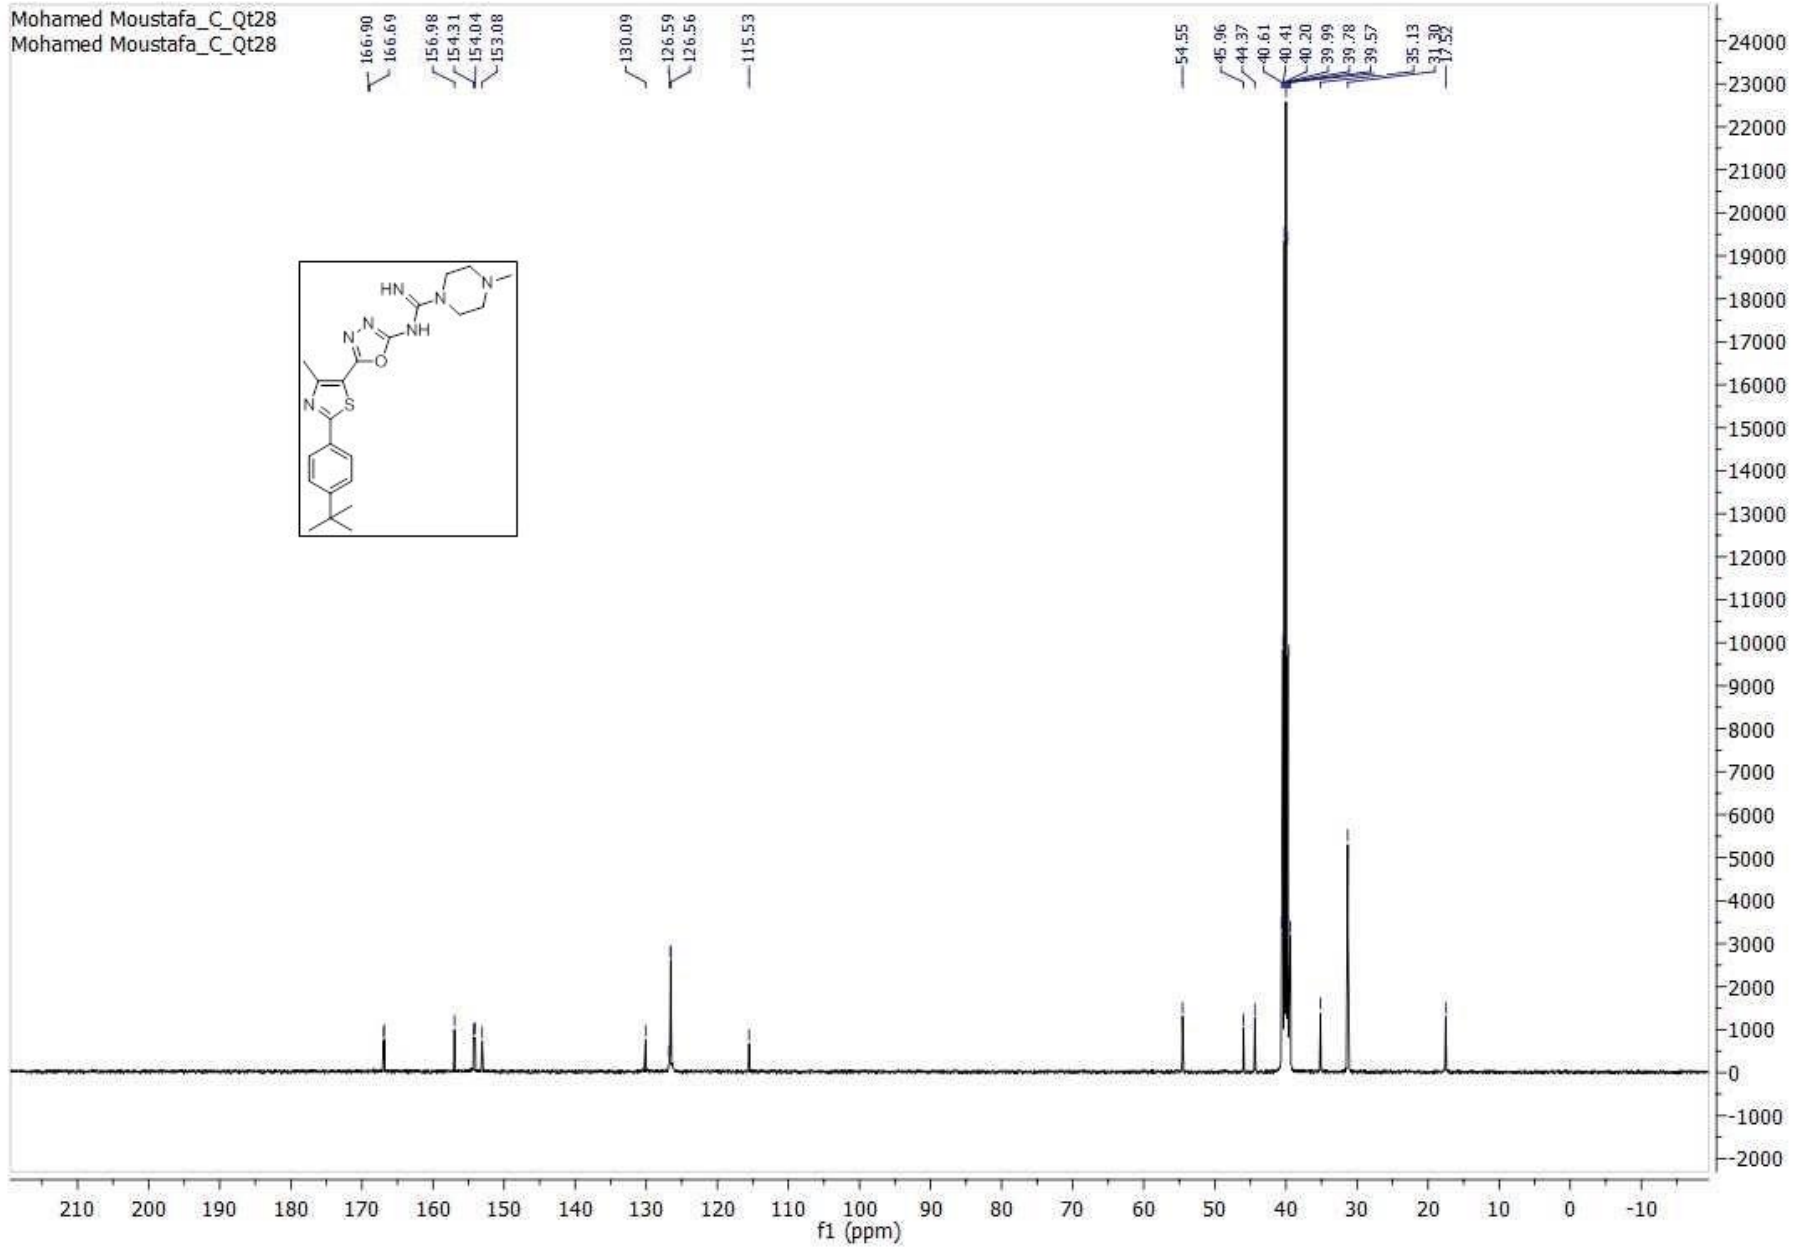

Mohamed Mostafa\_H\_Qt-17

Microanalytical Unit - FOPCU - NMR laboratory  
www.pharma.cu.edu.eg dir-mau.fopcu@pharma.cu.edu.eg

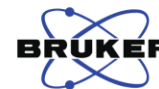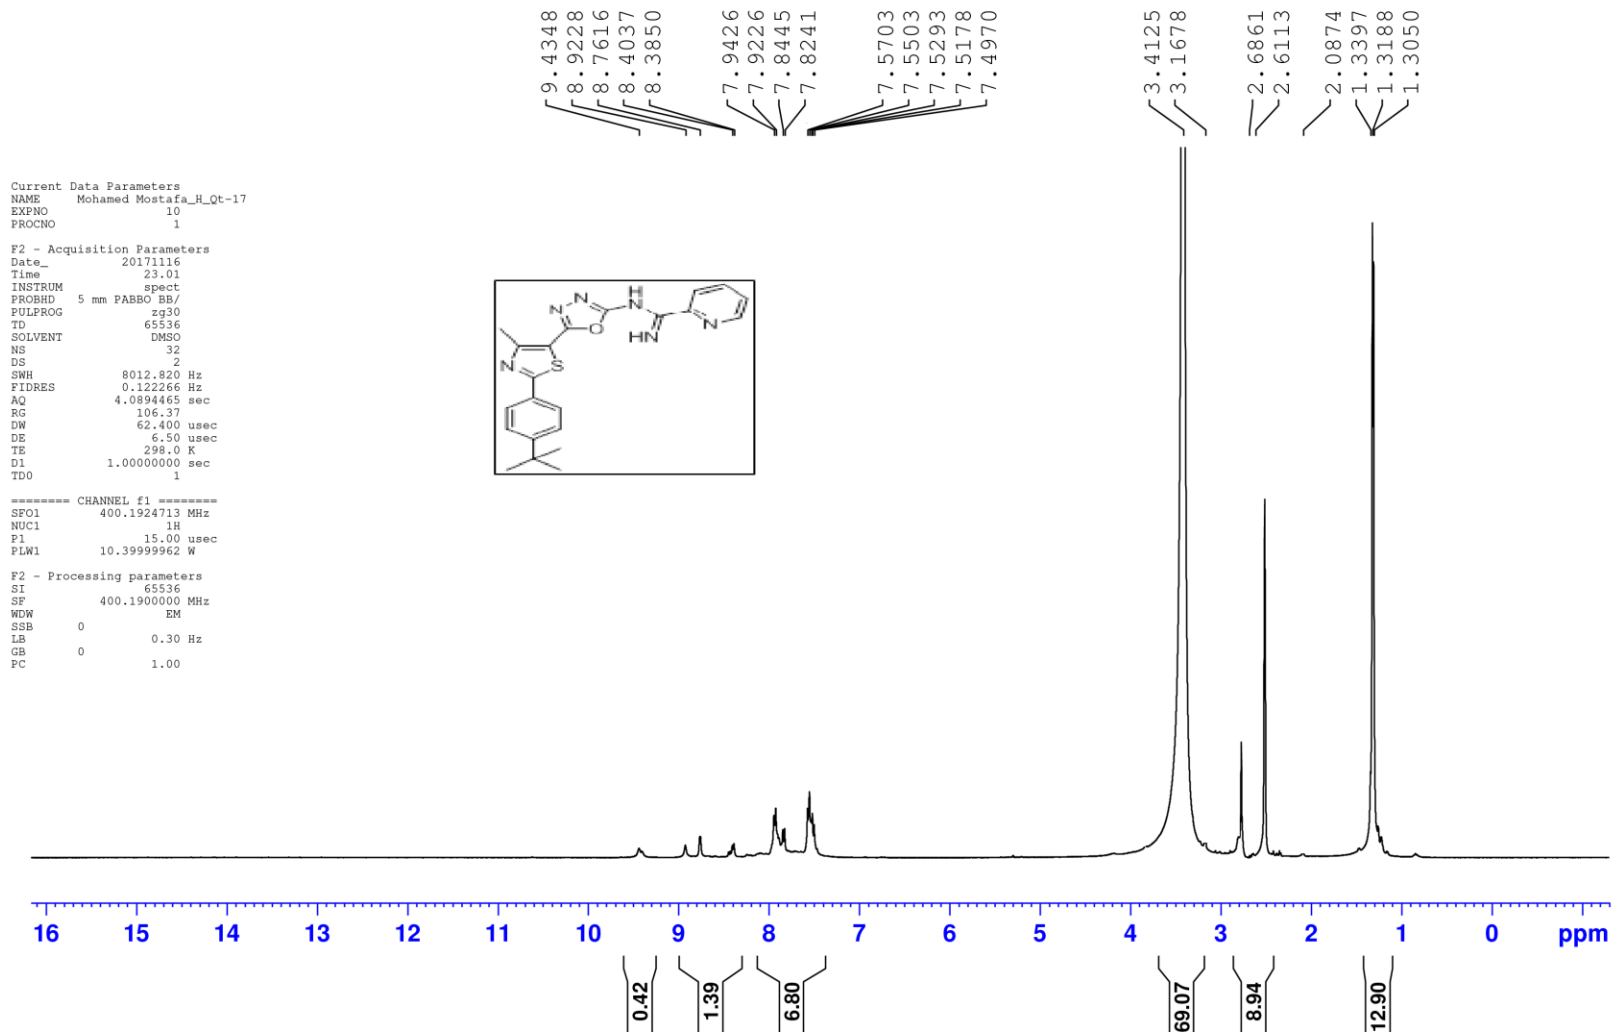

Mohamed Mostafa\_C\_MAS-85

Microanalytical Unit - FOPCU - NMR laboratory  
www.pharma.cu.edu.eg dir-mau.fopcu@pharma.cu.edu.eg

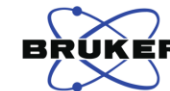

167.27  
166.95  
162.82  
158.48  
158.09  
154.22  
153.91  
149.00  
138.01  
131.72  
130.50  
126.56  
126.48  
122.69  
111.43

40.58  
40.38  
40.17  
39.75  
39.54  
39.33  
35.15  
31.34  
18.70

Current Data Parameters  
NAME Mohamed Mostafa\_C\_MAS-8  
EXPNO 10  
PROCNO 1

F2 - Acquisition Parameters  
Date\_ 20171115  
Time 18.37  
INSTRUM spect  
PROBHD 5 mm PABBO BB/  
PULPROG zgpg30  
TD 65536  
SOLVENT DMSO  
NS 1200  
DS 4  
SWH 24038.461 Hz  
FIDRES 0.366798 Hz  
AQ 1.3631488 sec  
RG 202.37  
DW 20.800 usec  
DE 6.50 usec  
TE 298.0 K  
D1 2.00000000 sec  
D11 0.03000000 sec  
TD0 1

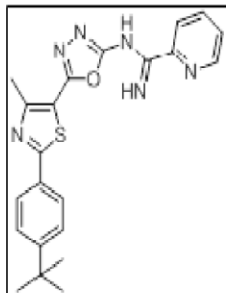

==== CHANNEL f1 =====  
SFO1 100.6379178 MHz  
NUC1 13C  
P1 10.00 usec  
PLW1 45.00000000 W

==== CHANNEL f2 =====  
SFO2 400.1916008 MHz  
NUC2 1H  
CPDPRG[2] waltz16

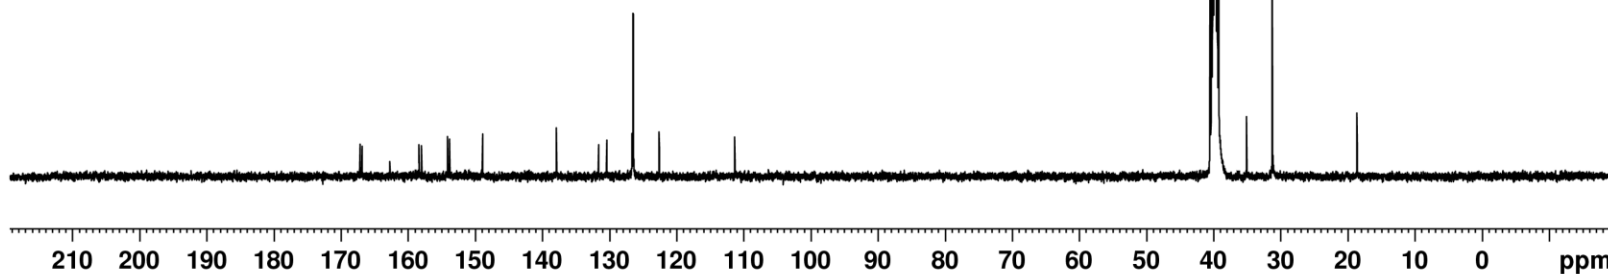

Mohamed Mostafa\_H\_Qt-18

Microanalytical Unit - FOPCU - NMR laboratory  
www.pharma.cu.edu.eg dir-mau.fopcu@pharma.cu.edu.eg

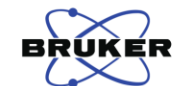

Current Data Parameters  
NAME Mohamed Mostafa\_H\_Qt-18  
EXPNO 10  
PROCNO 1

F2 - Acquisition Parameters  
Date\_ 20171117  
Time 1.31  
INSTRUM spect  
PROBHD 5 mm PABBO BB/  
PULPROG zg30  
TD 65536  
SOLVENT DMSO  
NS 32  
DS 2  
SWH 8012.820 Hz  
FIDRES 0.122266 Hz  
AQ 4.0894465 sec  
RG 64.21  
DW 62.400 usec  
DE 6.50 usec  
TE 298.0 K  
D1 1.00000000 sec  
TDO 1

===== CHANNEL f1 =====  
SFO1 400.1924713 MHz  
NUC1 1H  
P1 15.00 usec  
PLW1 10.39999962 W

F2 - Processing parameters  
SI 65536  
SF 400.1900000 MHz  
WDW EM  
SSB 0  
LB 0.30 Hz  
GB 0  
PC 1.00

9.7803  
9.2423  
9.0280  
8.7565  
8.7472  
8.4601  
8.4432  
7.9509  
7.8808  
7.8605  
7.8277  
7.8067  
7.5698  
7.5582  
7.5523  
7.5129  
7.4934

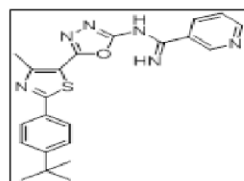

3.4358  
2.7281  
2.7199  
2.5137  
2.5097  
2.5059  
1.2852  
1.2025

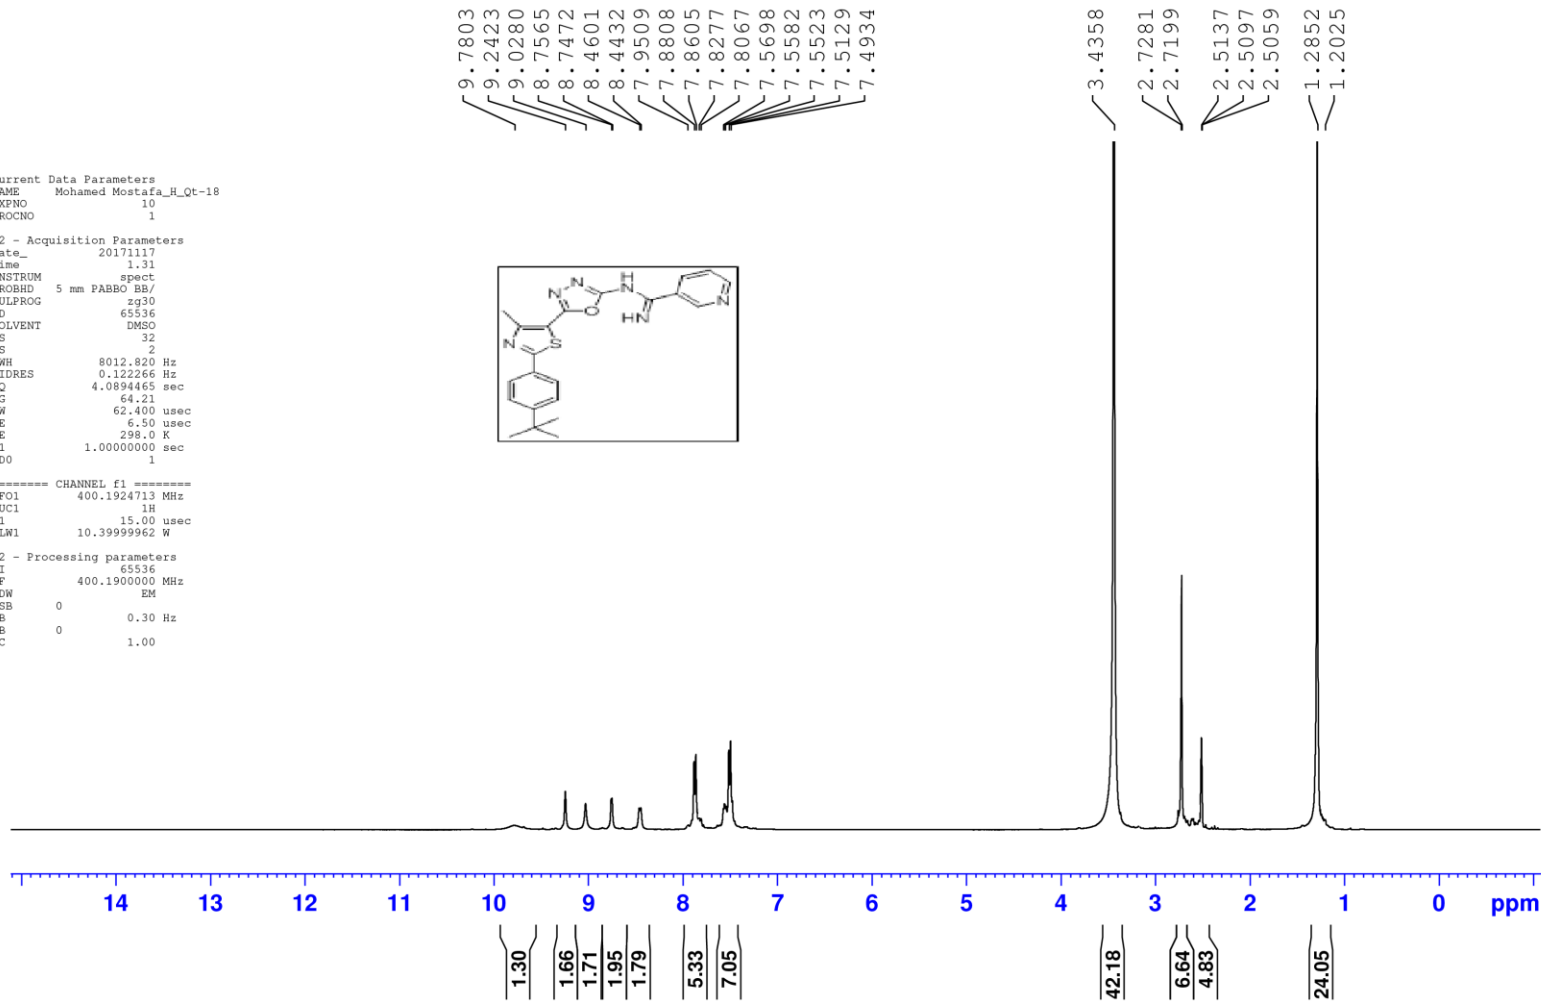

Mohamed Mostafa\_C\_Qt-18

Microanalytical Unit - FOPCU - NMR laboratory  
www.pharma.cu.edu.eg dir-mau.fopcu@pharma.cu.edu.eg

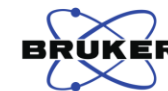

167.67  
166.41  
160.51  
155.43  
155.10  
154.53  
152.85  
149.22  
135.92  
130.64  
129.66  
126.57  
126.43  
123.95  
114.84

40.56  
40.36  
40.15  
39.94  
39.73  
39.52  
39.31  
35.14  
31.34  
17.63

Current Data Parameters  
NAME Mohamed Mostafa\_C\_Qt-18  
EXPNO 10  
PROCNO 1

F2 - Acquisition Parameters  
Date\_ 20171117  
Time 2.40  
INSTRUM spect  
PROBHD 5 mm PABBO BB/  
PULPROG zgpg30  
TD 65536  
SOLVENT DMSO  
NS 1200  
DS 4  
SWH 24038.461 Hz  
FIDRES 0.366798 Hz  
AQ 1.3631488 sec  
RG 202.37  
DW 20.800 usec  
DE 6.50 usec  
TE 298.0 K  
D1 2.00000000 sec  
D11 0.03000000 sec  
TD0 1

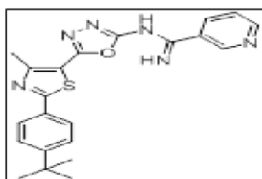

==== CHANNEL f1 =====  
SFO1 100.6379178 MHz  
NUC1 13C  
P1 10.00 usec  
PLW1 45.00000000 W

==== CHANNEL f2 =====  
SFO2 400.1916008 MHz  
NUC2 1H  
CPDPRG[2] waltz16

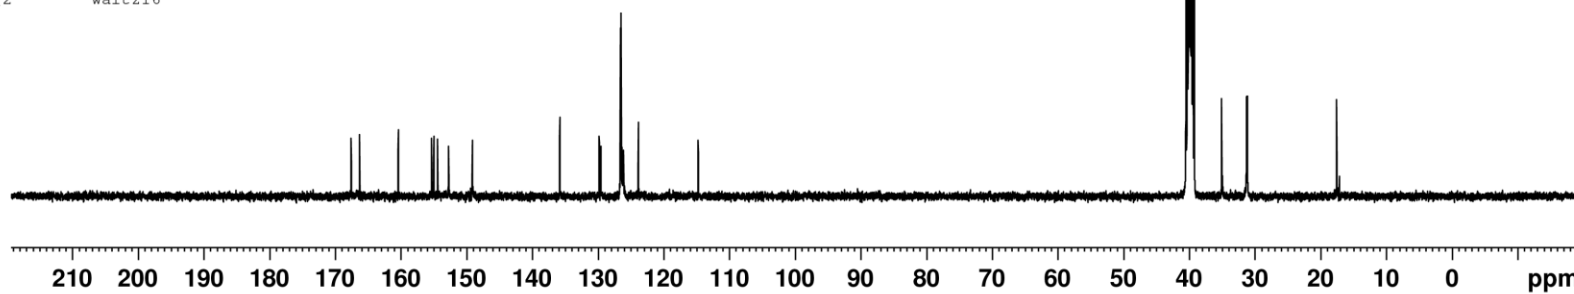



Mohamed Mostafa\_H\_Qt-19

Microanalytical Unit - FOPCU - NMR laboratory  
www.pharma.cu.edu.eg dir-mau.fopcu@pharma.cu.edu.eg

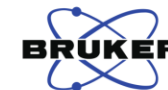

Current Data Parameters  
NAME Mohamed Mostafa\_H\_Qt-19  
EXPNO 10  
PROCNO 1

F2 - Acquisition Parameters  
Date\_ 20171117  
Time 0.16  
INSTRUM spect  
PROBHD 5 mm PABBO BB/  
PULPROG zg30  
TD 65536  
SOLVENT DMSO  
NS 32  
DS 2  
SWH 8012.820 Hz  
FIDRES 0.122266 Hz  
AQ 4.0894465 sec  
RG 72.66  
DW 62.400 usec  
DE 6.50 usec  
TE 298.0 K  
D1 1.00000000 sec  
TDO 1

----- CHANNEL f1 -----  
SFO1 400.1924713 MHz  
NUC1 1H  
P1 15.00 usec  
PLW1 10.39999962 W

F2 - Processing parameters  
SI 65536  
SF 400.1900000 MHz  
WDW EM  
SSB 0  
LB 0.30 Hz  
GB 0  
PC 1.00

9.8311  
9.0599  
8.7750  
8.7655  
7.8979  
7.8785  
7.8351  
7.8144  
7.6388  
7.6183  
7.5275  
7.5082  
7.4816  
7.3521  
7.3316  
3.4268  
2.7311  
2.5415  
2.5099  
1.2945  
1.2102

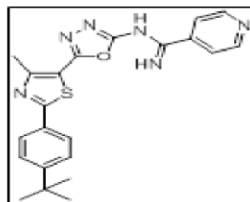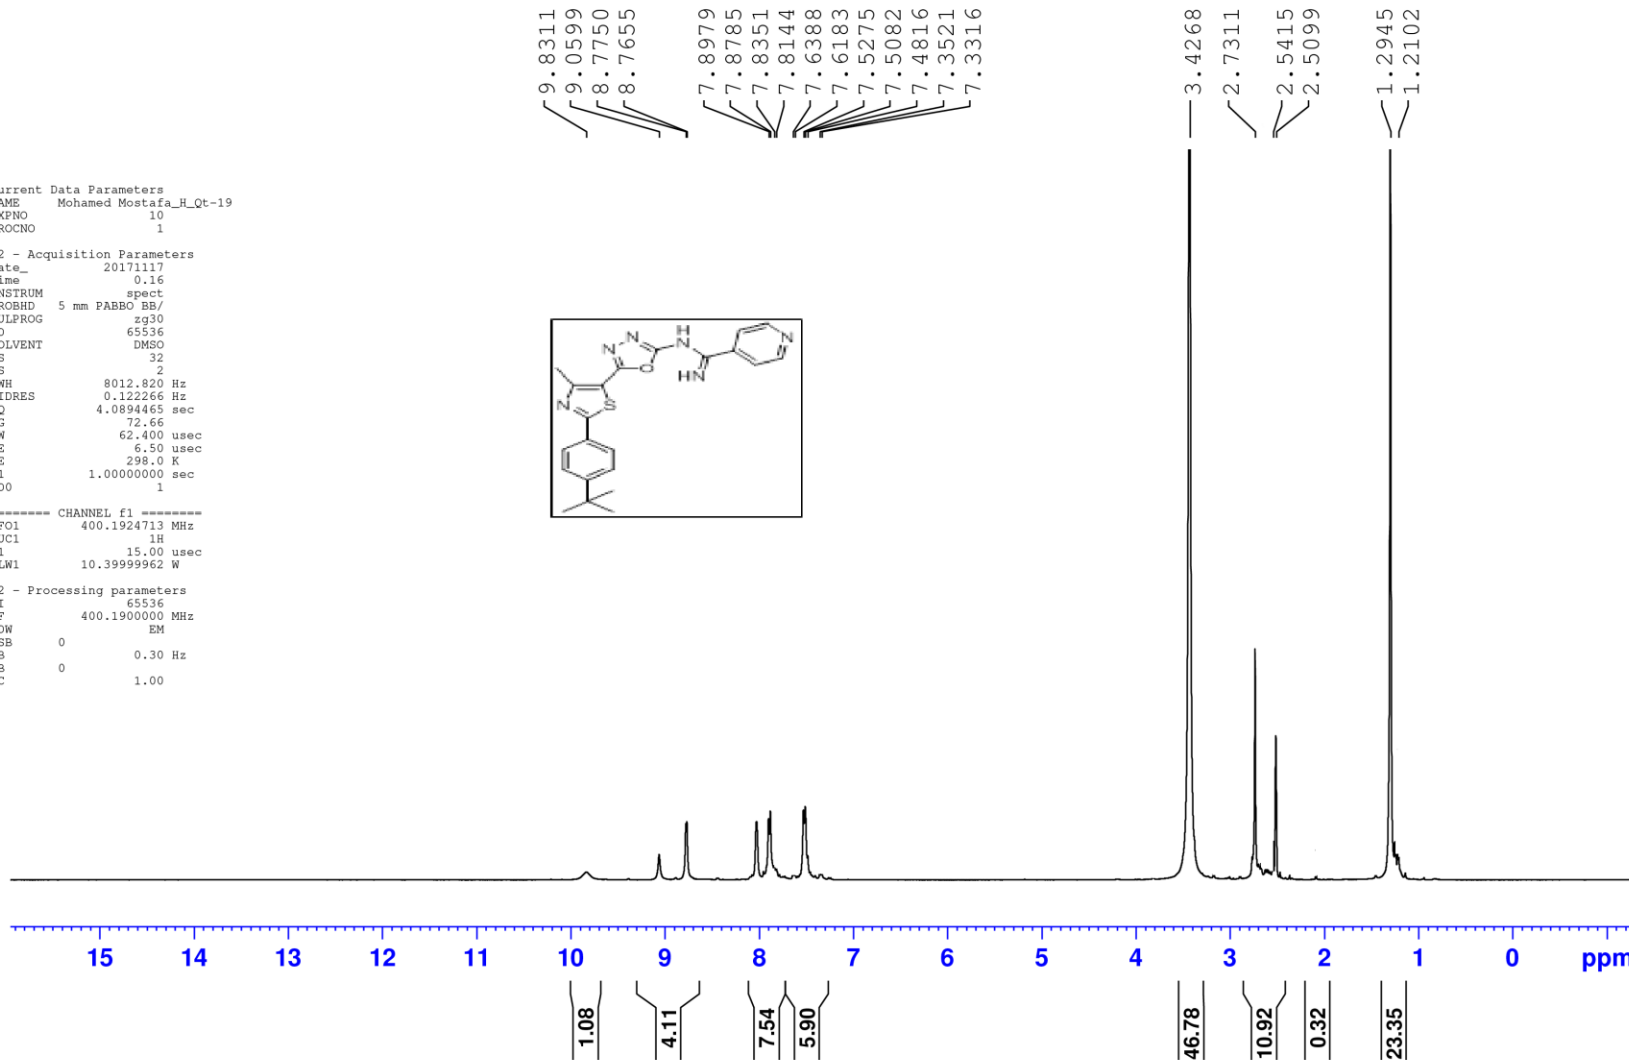

Mohamed Mostafa\_C\_Qt-19

Microanalytical Unit - FOPCU - NMR laboratory  
www.pharma.cu.edu.eg dir-mau.fopcu@pharma.cu.edu.eg

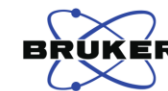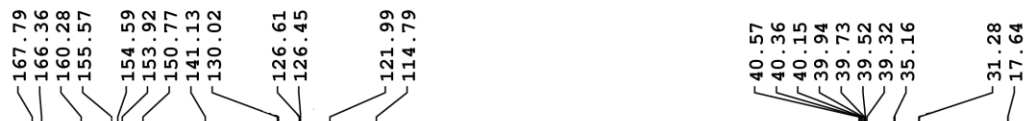

Current Data Parameters  
NAME Mohamed Mostafa\_C\_Qt-19  
EXPNO 10  
PROCNO 1

F2 - Acquisition Parameters  
Date\_ 20171117  
Time 1.26  
INSTRUM spect  
PROBHD 5 mm PABBO BB/  
PULPROG zgpg30  
TD 65536  
SOLVENT DMSO  
NS 1200  
DS 4  
SWH 24038.461 Hz  
FIDRES 0.366798 Hz  
AQ 1.3631488 sec  
RG 202.37  
DW 20.800 usec  
DE 6.50 usec  
TE 298.0 K  
D1 2.0000000 sec  
D11 0.0300000 sec  
TD0 1

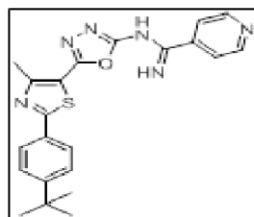

==== CHANNEL f1 =====  
SFO1 100.6379178 MHz  
NUC1 13C  
P1 10.00 usec  
PLW1 45.0000000 W  
  
==== CHANNEL f2 =====  
SFO2 400.1916008 MHz  
NUC2 1H  
CPDPRG[2] waltz16

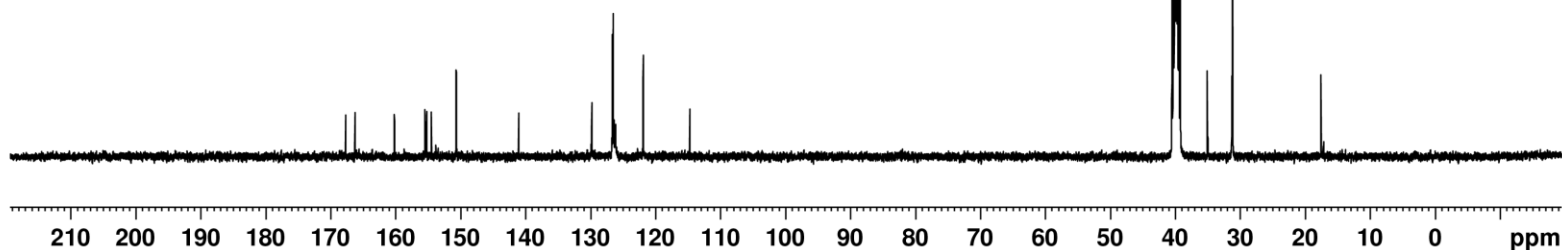

Dr\_AbdElrhman Salha-12\_PROTON\_01  
Dr\_AbdElrhman Salha-12

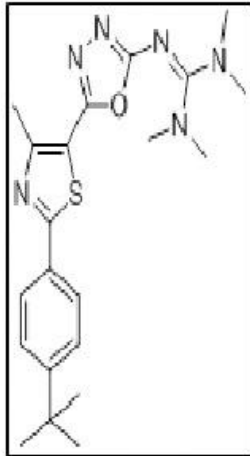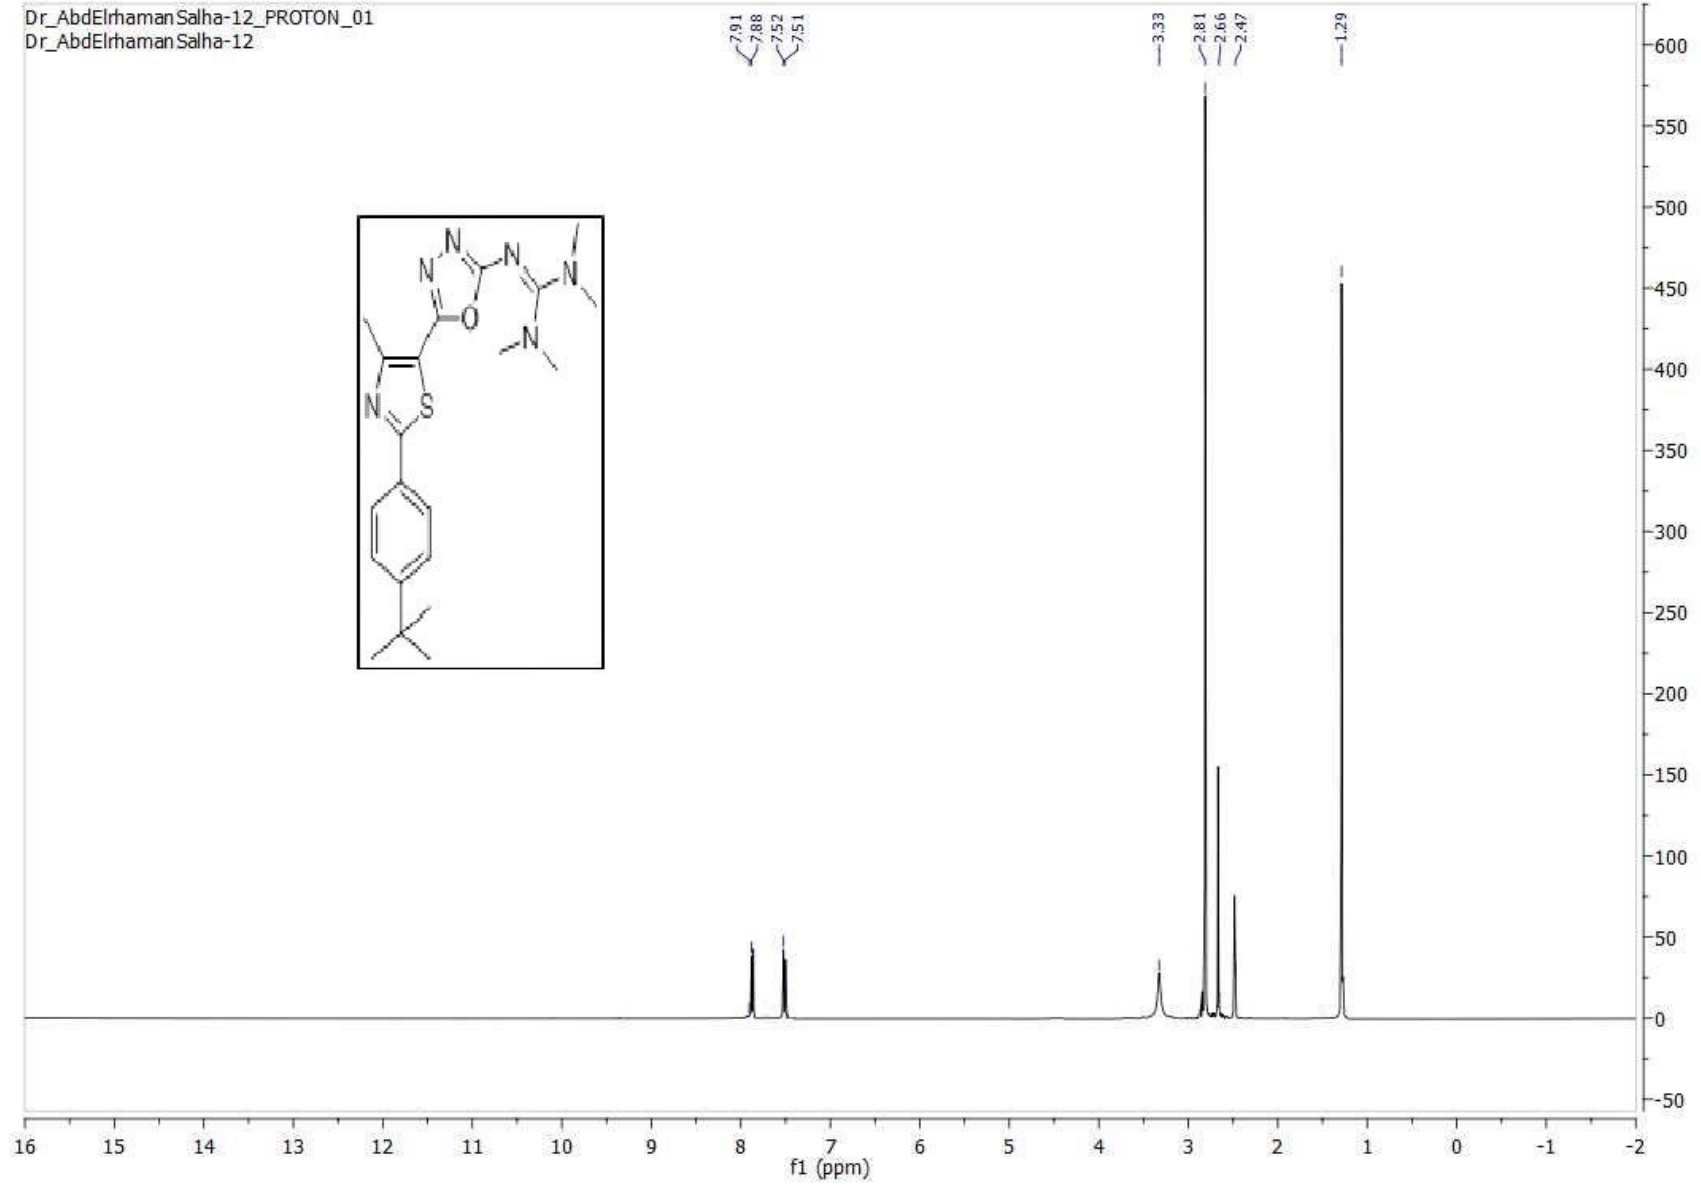

Dr\_AbdElrhman Salha-12\_CARBON\_01  
Dr\_AbdElrhman Salha-12

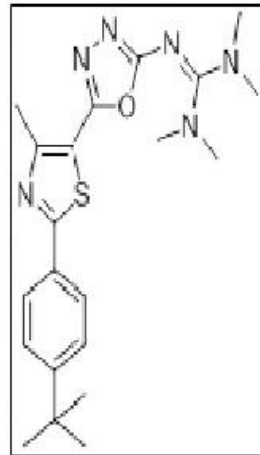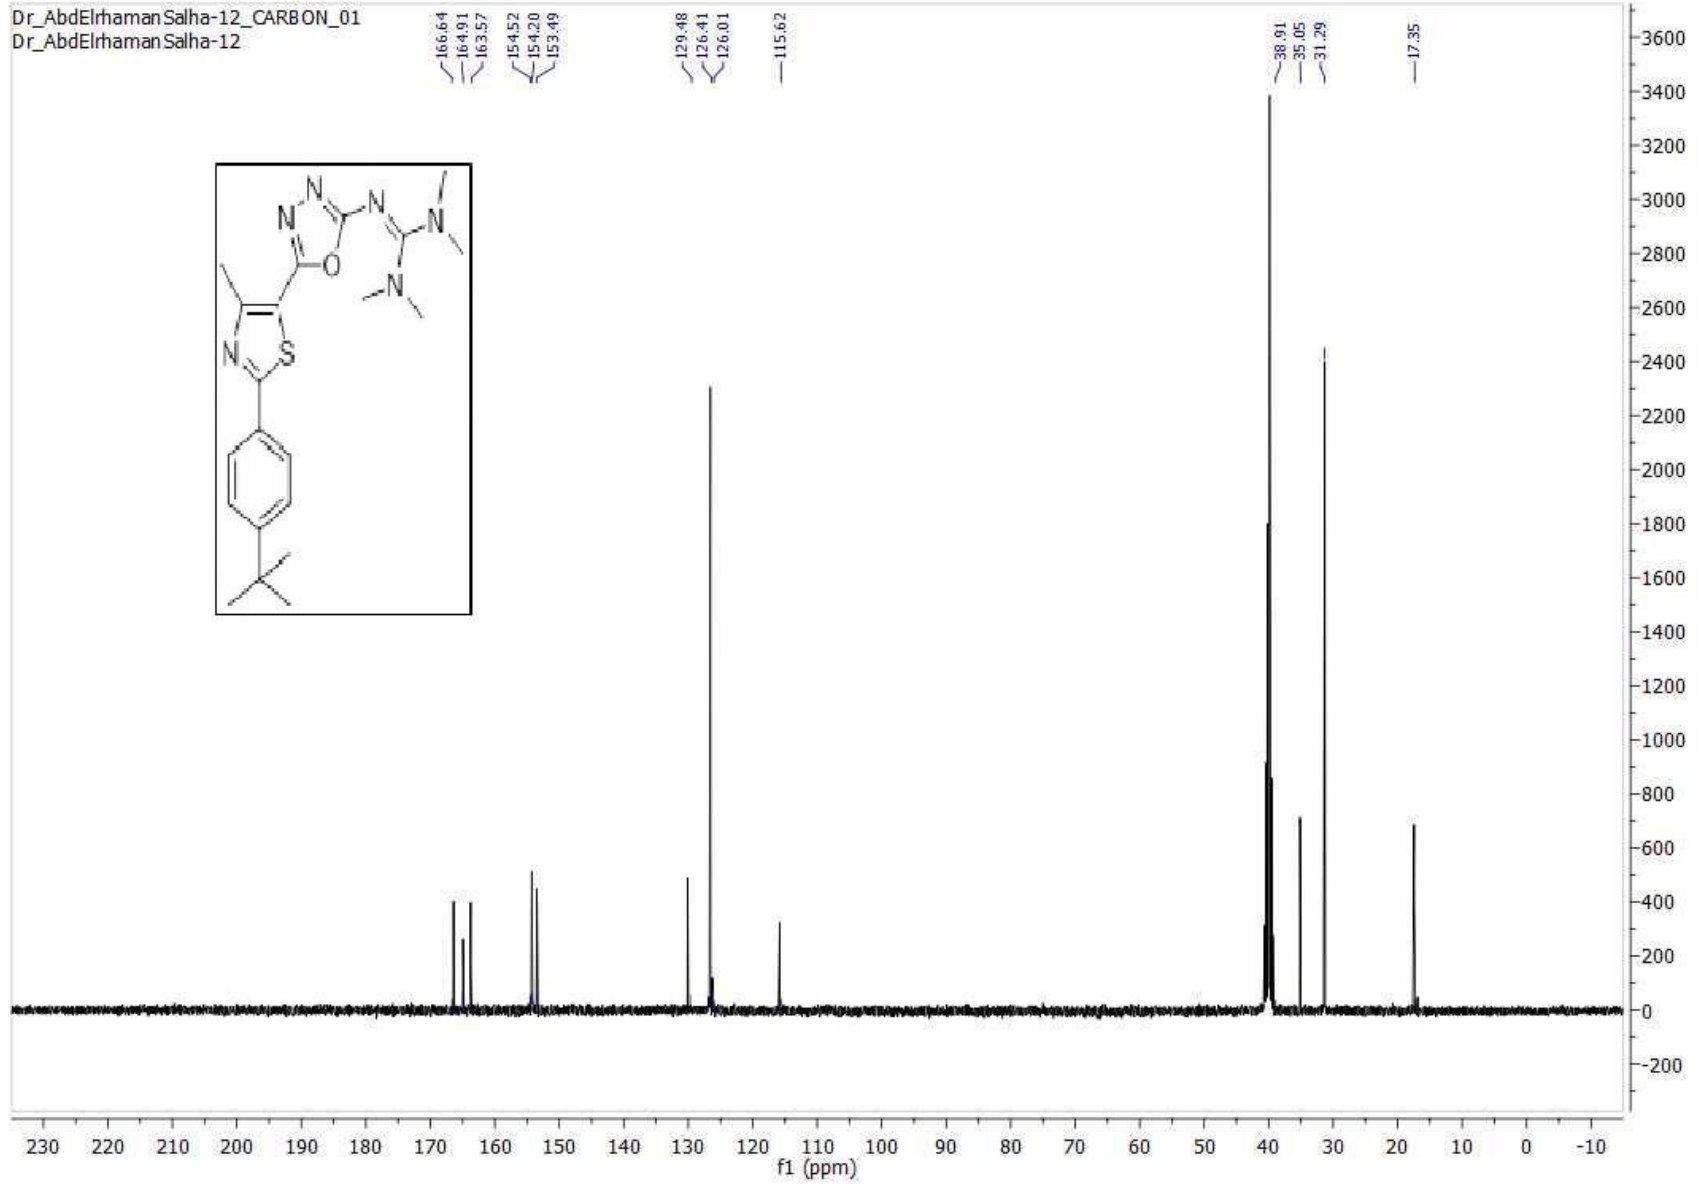

**References:**

- [1] H. Mohammad, K. Kyei-Baffour, W. Younis, D.C. Davis, H. Eldesouky, M.N. Seleem, M.J. Dai, Investigation of aryl isonitrile compounds with potent, broad-spectrum antifungal activity, *Bioorgan Med Chem*, 25 (2017) 2926-2931.
- [2] A. Kotb, N.S. Abutaleb, M.A. Seleem, M. Hagra, H. Mohammad, A. Bayoumi, A. Ghiaty, M.N. Seleem, A.S. Mayhoub, Phenylthiazoles with tert-Butyl side chain: Metabolically stable with anti-biofilm activity, *European journal of medicinal chemistry*, 151 (2018) 110-120.
